# Supplementary material for: Risk Factors for Lateral Neck Lymph Node Metastasis in Papillary Thyroid Ultra-Micro- Carcinoma: Implications for Active Surveillance
Source: Research Square preprint supplement (doi:10.21203/rs.3.rs-6344218/v1), 2025-04-25
Supplement: Supplementary file 1 [file 3b521243acf15c6ff2a21a50.xlsx]

## Sheet: Sheet1
lateralmets	ID	logigendercoding	gender	agecoding	age	opdate	opname	CCND	LND	Main site	locationcoding	location	Histology	subtype	Size	bilateralitycoding	logimulticoding	multicoding	multiplicity	margin	capsule	Psammomatous calcification	thyroiditis	centralcoding	posi CND	total CND	lateralcoding	posi LND	total LND	stage
0	1	1	0	1	55	20090922	0	1	0	0	0	2	0	0	0.08	0	1	0	0	1	0	0	0	1	1	11	0	0	0
0	2	1	0	0	27	20090904	0	1	0	1	0	1	0	0	0.1	0	1	0	0	1	0	1	0	0	0	7	0	0	0
0	3	1	0	1	66	20091023	0	1	0	0	0	1	0	0	0.1	0	1	0	0	1	0	0	1	0	0	1	0	0	0
0	4	1	0	1	59	20091102	1	1	0	1	1	0	0	0	0.1	0	1	0	0	0	0	0	0	0	0	2	0	0	0
0	5	1	0	0	29	20091110	1	1	0	1	0	2	0	0	0.1	0	1	0	0	0	0	0	1	1	1	13	0	0	0
0	6	1	0	0	47	20091116	1	0	0	1	1	0	0	0	0.1	0	1	0	0	1	0	0	0	0	0	0	0	0	0
0	7	1	0	0	46	20091217	0	1	0	0	0	1	0	0	0.1	0	1	0	0	1	0	0	1	0	0	8	0	0	0
0	8	0	1	0	36	20090226	1	1	0	0	0	1	0	0	0.2	0	1	0	0	1	0	0	0	0	0	1	0	0	6
0	9	0	1	0	25	20090305	0	1	0	0	0	1	0	0	0.2	0	1	0	0	1	0	1	0	1	1	2	0	0	0
1	10	1	0	0	40	20090310	1	1	1	1	1	0	0	0	0.2	0	1	0	0	1	1	0	0	0	0	9	1	7	43
0	11	1	0	0	30	20090324	0	1	0	0	0	2	0	0	0.2	0	1	0	0	1	0	0	0	0	0	2	0	0	0
0	12	1	0	0	37	20090424	0	1	0	1	0	1	0	0	0.2	0	1	0	0	1	0	0	0	0	0	4	0	0	0
0	13	1	0	0	50	20090427	1	1	0	1	1	0	0	0	0.2	1	0	1	2	1	1	0	0	0	0	5	0	0	0
0	14	0	1	0	41	20090427	0	1	0	0	0	1	0	0	0.2	0	1	0	0	0	0	0	0	0	0	1	0	0	0
0	15	1	0	1	62	20090430	1	1	0	0	0	1	0	0	0.2	0	1	0	0	0	0	0	0	0	0	7	0	0	0
0	16	1	0	1	55	20090504	1	1	0	1	0	1	0	0	0.2	1	0	1	2	0	0	0	0	0	0	12	0	0	0
0	17	1	0	0	37	20090511	0	1	0	1	1	0	0	0	0.2	0	1	0	0	0	0	1	0	0	0	1	0	0	0
0	18	1	0	0	49	20090529	1	1	0	0	0	1	0	0	0.2	0	1	0	0	0	0	0	0	0	0	2	0	0	0
0	19	1	0	1	67	20090609	0	1	0	1	0	1	0	0	0.2	0	1	0	0	0	0	0	0	0	0	3	0	0	0
0	20	1	0	0	32	20090611	0	1	0	0	0	1	0	0	0.2	0	1	0	0	1	0	0	0	0	0	5	0	0	0
0	21	1	0	0	36	20090615	0	1	0	1	0	1	0	0	0.2	0	1	0	0	0	0	0	1	0	0	7	0	0	0
0	22	1	0	0	43	20090617	0	1	0	1	0	1	0	0	0.2	0	1	0	0	1	0	0	0	0	0	1	0	0	0
0	23	1	0	0	32	20090619	0	1	0	1	1	0	0	0	0.2	0	1	0	0	1	0	0	0	0	0	3	0	0	0
0	24	1	0	0	35	20090619	1	1	0	1	0	1	0	0	0.2	0	1	0	0	0	0	0	1	0	0	8	0	0	0
0	25	0	1	0	47	20090702	0	1	1	0	0	1	0	0	0.2	0	1	0	0	1	0	0	1	0	0	6	0	0	0
0	26	1	0	0	45	20090710	1	1	0	1	0	2	0	0	0.2	0	1	0	0	0	0	0	0	0	0	5	0	0	0
0	27	1	0	0	45	20090820	0	1	0	0	0	1	0	0	0.2	0	1	0	0	0	0	0	0	0	0	2	0	0	0
0	28	1	0	0	49	20090824	1	1	0	0	0	2	0	0	0.2	0	1	0	0	0	0	0	0	0	0	4	0	0	0
0	29	1	0	0	49	20090902	0	1	0	0	0	1	0	0	0.2	0	1	0	0	1	0	0	0	0	0	2	0	0	0
0	30	1	0	1	65	20090902	1	1	0	1	1	0	0	0	0.2	0	0	1	1	1	0	0	0	1	1	5	0	0	0
0	31	0	1	0	40	20090902	1	1	0	0	1	0	0	0	0.2	0	1	0	0	1	0	1	0	1	1	3	0	0	0
0	32	1	0	0	38	20090902	0	1	0	0	0	2	0	0	0.2	0	1	0	0	1	0	0	0	0	0	1	0	0	0
0	33	1	0	0	41	20090909	1	1	0	0	0	1	0	0	0.2	0	1	0	0	1	0	0	0	0	0	6	0	0	0
0	34	1	0	0	27	20090910	1	1	0	1	0	1	0	0	0.2	0	1	0	0	1	0	0	0	0	0	8	0	0	0
0	35	1	0	1	58	20090910	1	1	0	0	0	2	0	0	0.2	0	1	0	0	1	0	0	0	0	0	0	0	0	0
0	36	1	0	1	58	20090910	1	1	0	0	0	2	0	0	0.2	0	0	1	1	1	0	1	0	0	0	10	0	0	0
0	37	1	0	0	30	20090911	0	1	0	0	0	1	0	0	0.2	0	1	0	0	1	1	0	0	0	0	6	0	0	0
0	38	1	0	1	55	20090915	0	1	0	1	1	0	0	0	0.2	0	1	0	0	1	0	0	0	0	0	2	0	0	0
0	39	1	0	0	50	20091012	0	1	0	0	1	0	0	0	0.2	0	1	0	0	1	1	0	0	0	0	1	0	0	0
0	40	1	0	1	69	20091016	1	1	0	1	0	1	0	0	0.2	0	1	0	0	1	0	0	0	0	0	5	0	0	0
0	41	0	1	1	66	20091021	0	1	0	1	1	0	0	0	0.2	0	1	0	0	1	0	0	0	0	0	2	0	0	0
0	42	1	0	0	41	20091023	0	1	0	0	1	0	0	0	0.2	0	1	0	0	1	0	0	0	0	0	1	0	0	0
0	43	1	0	0	33	20091125	0	1	0	1	0	1	0	0	0.2	0	1	0	0	1	0	0	1	0	0	7	0	0	0
0	44	1	0	0	48	20091208	1	1	0	1	0	1	0	0	0.2	0	1	0	0	1	0	0	1	0	0	13	0	0	0
0	45	1	0	0	41	20091208	1	1	0	1	0	1	0	0	0.2	0	1	0	0	1	0	0	0	0	0	5	0	0	0
0	46	1	0	0	30	20091209	0	1	0	1	0	1	0	0	0.2	0	1	0	0	1	0	0	1	0	0	3	0	0	0
0	47	1	0	0	45	20091210	1	1	0	0	0	2	0	0	0.2	0	1	0	0	1	0	0	1	0	0	10	0	0	0
0	48	1	0	1	57	20091210	1	1	0	0	1	0	0	0	0.2	0	1	0	0	0	0	0	0	0	0	6	0	0	0
0	49	1	0	0	39	20091228	0	1	0	1	0	2	0	0	0.2	0	1	0	0	1	0	0	0	0	0	1	0	0	0
0	50	1	0	0	34	20091230	0	1	0	1	1	0	0	0	0.2	0	1	0	0	0	0	0	0	0	0	3	0	0	0
0	51	1	0	1	56	20090410	0	1	0	1	0	1	0	0	0.25	0	1	0	0	1	0	0	1	0	0	5	0	0	0
0	52	1	0	0	42	20090514	1	1	0	0	0	1	0	0	0.25	0	0	1	1	1	0	0	0	0	0	2	0	0	0
0	53	1	0	1	57	20090313	1	1	0	1	1	0	0	0	0.3	0	1	0	0	1	1	1	0	0	0	1	0	0	0
0	54	0	1	1	66	20090318	1	1	0	0	0	1	0	0	0.3	0	1	0	0	0	1	0	0	1	1	1	0	0	0
0	55	1	0	0	47	20090320	1	1	0	1	0	2	0	0	0.3	0	1	0	0	0	0	1	0	0	0	8	0	0	0
1	56	1	0	0	52	20090323	1	1	1	0	1	0	0	0	0.3	0	1	0	0	1	0	0	0	0	0	6	1	8	42
0	57	1	0	1	58	20090330	0	1	0	0	0	1	0	0	0.3	0	1	0	0	0	0	0	0	0	0	7	0	0	0
0	58	1	0	0	32	20090402	1	1	0	0	1	0	0	0	0.3	0	1	0	0	1	0	0	0	0	0	7	0	0	0
0	59	1	0	1	65	20090407	0	1	0	0	0	1	0	0	0.3	0	1	0	0	0	0	0	0	1	1	2	0	0	0
0	60	1	0	0	54	20090413	1	1	0	0	1	0	0	1	0.3	0	1	0	0	0	0	0	0	0	0	3	0	0	0
0	61	1	0	0	41	20090416	0	1	0	1	1	0	0	0	0.3	0	0	1	1	1	0	0	1	0	0	10	0	0	2
0	62	1	0	0	46	20090417	1	1	0	1	0	2	0	0	0.3	0	1	0	0	0	0	1	0	0	0	8	0	0	0
0	63	1	0	0	48	20090417	1	1	0	1	0	1	0	0	0.3	0	1	0	0	0	0	1	0	1	1	2	0	0	0
0	64	1	0	0	50	20090421	1	1	0	1	1	0	0	0	0.3	0	1	0	0	1	1	0	0	0	0	1	0	0	0
0	65	1	0	1	59	20090422	1	1	0	1	1	0	0	0	0.3	0	1	0	0	0	0	0	0	0	0	2	0	0	0
0	66	1	0	0	46	20090422	0	1	0	0	1	0	0	0	0.3	0	1	0	0	1	0	0	1	0	0	9	0	0	0
0	67	1	0	0	32	20090427	1	1	0	0	0	1	0	0	0.3	0	1	0	0	0	0	0	0	0	0	10	0	0	0
0	68	1	0	0	42	20090504	0	1	0	1	0	1	0	0	0.3	0	1	0	0	1	0	1	0	0	0	10	0	0	0
0	69	1	0	0	42	20090504	1	1	0	0	0	1	0	0	0.3	0	1	0	0	0	0	1	0	1	1	3	0	0	0
0	70	1	0	0	51	20090506	0	1	0	1	0	1	0	0	0.3	0	1	0	0	0	0	0	1	0	0	3	0	0	0
0	71	1	0	1	60	20090511	1	1	0	0	0	2	0	0	0.3	0	1	0	0	1	1	0	0	0	0	0	0	0	0
0	72	0	1	0	48	20090513	1	1	0	0	0	1	0	0	0.3	0	1	0	0	1	0	0	0	0	0	0	0	0	0
0	73	1	0	0	33	20090513	1	1	0	1	0	1	0	0	0.3	0	1	0	0	1	0	0	1	0	0	2	0	0	0
0	74	1	0	0	43	20090519	1	1	0	1	0	1	0	0	0.3	0	1	0	0	1	0	1	0	0	0	4	0	0	0
0	75	1	0	1	58	20090521	1	1	0	0	0	2	0	0	0.3	0	0	1	1	1	0	0	0	0	0	6	0	0	0
0	76	1	0	0	52	20090525	1	1	0	1	0	1	0	0	0.3	0	1	0	0	0	0	0	0	0	0	1	0	0	0
0	77	1	0	0	35	20090601	0	1	0	0	1	0	0	0	0.3	0	1	0	0	0	0	1	0	0	0	1	0	0	0
0	78	1	0	1	74	20090603	1	1	0	0	0	1	0	1	0.3	0	1	0	0	0	0	0	1	0	0	2	0	0	0
0	79	0	1	1	57	20090605	1	1	0	0	0	1	0	0	0.3	0	1	0	0	1	0	0	1	0	0	17	0	0	0
0	80	1	0	0	39	20090609	1	1	0	0	0	1	0	0	0.3	0	1	0	0	1	0	0	1	0	0	17	0	0	0
0	81	1	0	0	45	20090611	0	1	0	1	1	0	0	0	0.3	0	1	0	0	0	0	0	1	0	0	8	0	0	0
0	82	1	0	0	45	20090622	1	1	0	1	0	1	0	0	0.3	1	0	1	2	1	0	0	1	0	0	9	0	0	0
0	83	1	0	1	62	20090624	1	1	0	1	1	0	0	0	0.3	0	1	0	0	0	1	0	0	0	0	2	0	0	7
0	84	1	0	0	48	20090626	1	1	0	0	0	1	0	0	0.3	0	1	0	0	1	0	0	1	0	0	4	0	0	0
0	85	1	0	0	39	20090703	0	1	0	0	0	1	0	1	0.3	0	1	0	0	1	0	0	0	0	0	4	0	0	0
0	86	0	1	1	69	20090709	1	1	0	1	0	1	0	0	0.3	1	1	1	2	1	1	0	0	0	0	5	0	0	0
0	87	1	0	1	57	20090716	1	1	0	0	0	1	0	0	0.3	0	1	0	0	0	0	0	0	0	0	1	0	0	0
0	88	1	0	0	43	20090717	0	0	0	1	0	1	0	0	0.3	0	1	0	0	1	0	0	0	0	0	0	0	0	0
0	89	1	0	0	42	20090727	1	1	0	1	1	0	0	1	0.3	0	1	0	0	0	0	0	0	0	0	2	0	0	0
0	90	1	0	0	29	20090727	0	1	0	0	0	1	0	0	0.3	0	1	0	0	0	0	1	0	0	0	2	0	0	0
0	91	1	0	1	65	20090817	0	1	0	0	0	1	0	0	0.3	0	1	0	0	0	0	0	1	0	0	3	0	0	0
0	92	1	0	0	42	20090819	1	1	0	0	0	1	0	1	0.3	1	0	1	2	0	0	0	1	0	0	6	0	0	0
0	93	1	0	0	53	20090827	1	1	0	0	0	1	0	0	0.3	0	1	0	0	0	0	0	0	0	0	3	0	0	0
0	94	0	1	1	62	20090901	0	1	0	0	0	1	0	0	0.3	0	1	0	0	1	0	0	0	0	0	1	0	0	0
0	95	1	0	1	63	20090903	1	1	0	1	0	1	0	0	0.3	0	1	0	0	1	0	0	0	0	0	4	0	0	0
0	96	1	0	0	41	20090904	1	1	0	1	0	1	0	0	0.3	1	0	1	2	0	0	0	0	0	0	4	0	0	0
0	97	1	0	1	59	20090908	1	1	0	1	0	2	0	4	0.3	0	1	0	0	0	0	0	0	0	0	5	0	0	2
0	98	0	1	1	56	20090910	1	1	0	2	0	1	0	0	0.3	1	1	1	2	1	1	0	0	1	2	7	0	0	0
0	99	0	1	1	56	20090915	1	1	0	0	1	0	0	0	0.3	1	1	1	2	1	0	1	0	1	2	4	0	0	0
0	100	1	0	0	45	20090916	0	1	0	0	0	1	0	0	0.3	0	1	0	0	1	0	0	1	0	0	8	0	0	0
0	101	1	0	0	38	20090921	1	1	0	0	0	1	0	0	0.3	0	0	1	1	1	0	0	0	0	0	4	0	0	0
0	102	1	0	0	48	20090922	1	1	0	0	1	0	0	0	0.3	0	1	0	0	1	0	1	0	0	0	11	0	0	0
0	103	1	0	0	35	20090929	0	1	0	1	0	2	0	0	0.3	0	1	0	0	1	0	0	0	0	0	3	0	0	0
0	104	1	0	1	56	20090929	0	1	0	0	0	1	0	0	0.3	0	1	0	0	1	1	0	1	0	0	6	0	0	0
0	105	1	0	0	36	20090930	1	1	0	1	0	2	0	0	0.3	1	0	1	2	1	0	0	0	0	0	6	0	0	0
0	106	1	0	0	38	20091023	1	1	0	1	1	0	0	0	0.3	1	0	1	2	1	0	0	1	0	0	7	0	0	0
0	107	0	1	0	30	20091110	0	1	0	0	0	1	0	0	0.3	0	1	0	0	0	0	0	0	0	0	4	0	0	0
0	108	1	0	0	34	20091116	1	1	0	0	0	1	0	0	0.3	1	0	1	2	1	1	1	0	0	0	2	0	0	0
0	109	0	1	0	44	20091119	0	1	0	0	0	2	0	0	0.3	0	1	0	0	1	0	0	0	0	0	5	0	0	0
0	110	0	1	1	55	20091127	0	1	0	0	1	0	0	0	0.3	0	1	0	0	1	0	0	0	0	0	0	0	0	0
0	111	1	0	0	45	20091202	0	1	0	0	0	1	0	0	0.3	0	1	0	0	1	0	0	1	0	0	1	0	0	0
0	112	1	0	0	36	20091202	1	1	0	0	0	1	0	0	0.3	1	0	1	2	1	1	0	0	0	0	8	0	0	4
0	113	1	0	0	39	20091202	1	1	0	0	0	1	0	1	0.3	0	1	0	0	0	0	0	0	0	0	3	0	0	0
0	114	1	0	0	28	20091204	1	1	0	1	0	1	0	0	0.3	0	1	0	0	1	0	0	1	0	0	4	0	0	0
0	115	1	0	0	54	20091207	1	1	0	0	0	1	0	0	0.3	0	1	0	0	0	0	0	1	0	0	1	0	0	0
0	116	1	0	0	40	20091209	0	1	0	0	0	2	0	1	0.3	0	1	0	0	0	0	0	1	0	0	4	0	0	0
0	117	1	0	0	47	20091210	1	1	0	0	0	1	0	0	0.3	0	1	0	0	1	1	0	1	0	0	7	0	0	0
0	118	0	1	0	53	20091214	0	1	0	1	1	0	0	0	0.3	0	1	0	0	1	0	0	1	0	0	11	0	0	0
0	119	1	0	0	43	20091221	1	1	0	1	0	1	0	0	0.3	1	0	1	2	1	0	0	1	1	2	12	0	0	0
0	120	1	0	0	51	20091222	1	1	0	0	0	2	0	0	0.3	0	1	0	0	1	1	0	0	1	3	11	0	0	2
0	121	1	0	1	58	20091223	1	1	0	0	1	0	0	0	0.3	1	0	1	2	1	1	1	0	0	0	3	0	0	0
0	122	0	1	1	55	20091223	0	1	0	0	0	1	0	0	0.3	0	1	0	0	1	0	0	0	0	0	5	0	0	0
0	123	1	0	1	59	20091223	1	1	0	0	0	1	0	0	0.3	1	0	1	2	1	1	1	0	0	0	4	0	0	0
0	124	1	0	0	52	20091230	1	1	0	0	1	0	0	0	0.3	0	1	0	0	1	0	0	0	1	1	3	0	0	0
0	125	1	0	1	56	20091230	0	1	0	1	0	2	0	0	0.3	0	1	0	0	1	0	0	1	1	1	2	0	0	0
0	126	0	1	1	67	20090601	1	1	0	1	0	2	0	0	0.35	0	1	0	0	1	1	0	0	0	0	5	0	0	0
0	127	1	0	0	50	20090205	1	1	0	0	0	2	0	0	0.4	0	1	0	0	0	0	0	1	0	0	6	0	0	0
0	128	1	0	1	60	20090226	1	1	0	0	0	1	0	0	0.4	0	1	0	0	1	1	1	1	1	1	5	0	0	0
0	129	0	1	1	62	20090316	1	1	0	1	0	2	0	0	0.4	0	1	0	0	1	0	1	0	0	0	1	0	0	0
0	130	1	0	1	66	20090325	1	1	0	1	0	1	0	0	0.4	0	0	1	1	1	0	0	0	0	0	4	0	0	0
0	131	1	0	0	54	20090326	1	1	0	1	0	2	0	0	0.4	1	0	1	2	1	1	0	1	0	0	10	0	0	0
0	132	1	0	0	50	20090331	1	1	0	1	0	2	0	0	0.4	0	1	0	0	1	0	0	0	0	0	2	0	0	1
0	133	1	0	0	29	20090409	0	1	0	0	0	1	0	0	0.4	0	1	0	0	1	0	0	0	0	0	11	0	0	0
0	134	1	0	0	48	20090409	0	1	0	1	0	1	0	0	0.4	0	1	0	0	1	0	0	0	0	0	9	0	0	0
0	135	1	0	0	31	20090409	1	1	0	0	0	1	0	0	0.4	0	1	0	0	1	1	0	1	0	0	10	0	0	1
0	136	1	0	0	29	20090413	0	1	0	0	0	1	0	0	0.4	0	1	0	0	0	0	0	0	0	0	4	0	0	0
1	137	1	0	0	48	20090413	1	1	1	1	1	0	0	0	0.4	0	0	1	1	0	0	1	0	0	0	1	1	8	36
0	138	1	0	0	33	20090414	0	1	0	0	0	1	0	0	0.4	0	1	0	0	0	0	1	0	1	1	3	0	0	0
0	139	1	0	0	37	20090416	0	1	0	1	0	1	0	0	0.4	0	1	0	0	1	1	0	0	0	0	4	0	0	0
0	140	1	0	0	28	20090421	0	1	0	0	0	2	0	2	0.4	0	1	0	0	1	0	1	0	1	2	9	0	0	0
0	141	1	0	0	40	20090422	1	1	0	1	0	1	0	0	0.4	0	1	0	0	1	1	0	0	0	0	4	0	0	4
0	142	1	0	0	54	20090422	1	1	0	1	0	1	0	0	0.4	0	1	0	0	0	0	1	0	0	0	7	0	0	0
0	143	1	0	1	63	20090423	1	1	0	0	0	1	0	1	0.4	1	0	1	2	1	0	1	0	0	0	6	0	0	0
0	144	1	0	0	30	20090424	1	1	0	0	1	0	0	0	0.4	0	1	0	0	0	0	1	0	0	0	1	0	0	8
0	145	1	0	0	48	20090424	1	1	0	0	0	1	0	0	0.4	1	0	1	2	1	1	1	1	1	4	10	0	0	0
0	146	1	0	0	44	20090427	1	1	0	0	0	1	0	0	0.4	0	1	0	0	1	0	0	0	0	0	6	0	0	0
0	147	1	0	0	46	20090429	1	1	0	0	1	0	0	0	0.4	0	0	1	1	1	0	0	1	0	0	16	0	0	0
0	148	1	0	0	50	20090504	1	1	0	1	0	2	0	0	0.4	0	1	0	0	1	0	1	0	0	0	1	0	0	0
0	149	1	0	0	23	20090507	0	1	0	0	0	1	0	0	0.4	0	1	0	0	0	1	0	0	1	1	9	0	0	0
0	150	1	0	0	49	20090511	1	1	0	1	0	1	0	0	0.4	1	0	1	2	1	1	0	0	0	0	0	0	0	0
0	151	1	0	0	42	20090511	0	1	0	0	1	0	0	0	0.4	0	1	0	0	1	1	0	0	0	0	2	0	0	0
0	152	1	0	0	39	20090511	0	1	0	0	0	1	0	0	0.4	0	1	0	0	1	1	0	0	0	0	3	0	0	0
0	153	1	0	0	54	20090512	0	1	0	0	0	2	0	0	0.4	0	1	0	0	0	0	0	1	0	0	5	0	0	0
0	154	1	0	1	57	20090525	1	1	0	0	1	0	0	0	0.4	0	0	1	1	1	0	0	0	0	0	6	0	0	0
0	155	1	0	0	54	20090525	1	1	0	1	1	0	0	0	0.4	0	1	0	0	0	0	0	0	1	1	5	0	0	0
0	156	0	1	1	61	20090528	1	1	0	1	0	2	0	0	0.4	0	1	0	0	0	0	0	0	0	0	0	0	0	0
0	157	1	0	0	51	20090601	1	1	0	0	1	0	0	0	0.4	0	1	0	0	1	1	0	1	1	1	23	0	0	0
0	158	1	0	0	42	20090601	1	1	0	0	1	0	0	0	0.4	0	1	0	0	0	1	0	0	1	1	8	0	0	0
0	159	1	0	0	45	20090602	0	1	0	1	0	2	0	1	0.4	0	1	0	0	0	0	1	1	0	0	6	0	0	0
0	160	1	0	0	44	20090602	1	1	0	0	1	0	0	0	0.4	1	0	1	2	1	0	0	0	0	0	7	0	0	0
0	161	1	0	0	30	20090605	1	1	0	0	0	1	0	0	0.4	0	1	0	0	1	0	1	1	1	6	8	0	0	0
0	162	1	0	0	45	20090608	1	1	0	1	0	2	0	0	0.4	0	1	0	0	1	0	0	0	0	0	10	0	0	0
0	163	0	1	0	37	20090608	1	1	1	1	0	1	0	0	0.4	0	1	0	0	1	0	0	0	0	0	12	0	0	73
0	164	1	0	0	51	20090609	1	1	0	0	0	1	0	0	0.4	0	0	1	1	1	0	0	1	0	0	5	0	0	0
0	165	1	0	1	62	20090610	1	1	0	0	0	1	0	0	0.4	0	1	0	0	1	0	0	0	1	6	12	0	0	0
0	166	1	0	0	39	20090611	0	1	0	0	0	2	0	0	0.4	0	1	0	0	1	0	0	1	1	1	9	0	0	0
0	167	1	0	0	50	20090612	0	1	0	0	0	1	0	0	0.4	0	1	0	0	1	0	0	0	0	0	0	0	0	0
0	168	1	0	0	38	20090615	1	1	0	1	1	0	0	0	0.4	0	0	1	1	1	1	0	0	0	0	11	0	0	0
0	169	0	1	1	55	20090617	1	1	0	0	1	0	0	0	0.4	1	1	1	2	1	1	0	1	0	0	13	0	0	0
0	170	1	0	0	41	20090619	1	1	0	1	0	1	0	0	0.4	0	0	1	1	1	1	1	0	0	0	2	0	0	0
0	171	1	0	0	40	20090623	0	1	0	1	0	1	0	0	0.4	0	1	0	0	0	0	0	0	0	0	6	0	0	0
0	172	1	0	0	47	20090624	0	1	0	1	0	2	0	0	0.4	0	1	0	0	1	0	0	1	0	0	6	0	0	0
0	173	1	0	0	42	20090626	0	1	0	1	0	2	0	0	0.4	0	1	0	0	1	0	0	0	1	1	9	0	0	0
0	174	1	0	0	52	20090626	1	1	0	1	0	1	0	0	0.4	0	1	0	0	1	0	0	1	0	0	0/8	0	0	0
0	175	1	0	0	47	20090630	0	1	0	1	0	1	0	0	0.4	0	1	0	0	1	0	0	1	0	0	0	0	0	0
1	176	1	0	0	48	20090630	1	1	1	1	1	0	0	0	0.4	1	0	1	2	1	1	0	1	1	1	3	1	8	59
0	177	1	0	0	35	20090701	0	1	0	0	0	2	0	0	0.4	0	0	1	1	1	0	1	0	0	0	1	0	0	0
0	178	0	1	0	45	20090702	0	1	0	0	0	1	0	0	0.4	0	1	0	0	1	0	0	0	1	1	4	0	0	0
0	179	0	1	0	46	20090707	1	1	0	0	0	1	0	1	0.4	1	1	1	2	1	1	0	0	0	0	2	0	0	0
0	180	0	1	0	27	20090713	0	1	0	0	1	0	0	0	0.4	0	1	0	0	0	0	0	0	1	2	4	0	0	0
0	181	1	0	0	52	20090717	0	1	0	1	0	2	0	0	0.4	0	1	0	0	1	0	0	0	0	0	3	0	0	0
0	182	1	0	0	54	20090717	1	1	0	1	0	2	0	0	0.4	0	1	0	0	0	0	0	0	0	0	2	0	0	0
0	183	1	0	1	64	20090723	1	1	0	0	1	0	0	0	0.4	0	1	0	0	0	1	1	0	0	0	8	0	0	0
0	184	0	1	1	66	20090729	1	1	0	0	1	0	0	0	0.4	0	1	0	0	0	0	0	0	0	0	3	0	0	0
0	185	1	0	0	50	20090730	1	1	0	1	1	0	0	0	0.4	0	1	0	0	1	1	0	1	0	0	6	0	0	0
0	186	0	1	0	51	20090819	1	1	0	2	0	1	0	0	0.4	0	1	0	0	1	1	0	0	0	0	6	0	0	0
0	187	1	0	0	39	20090831	0	1	0	1	1	0	0	0	0.4	0	1	0	0	1	1	0	1	0	0	3	0	0	0
0	188	1	0	0	36	20090831	1	1	0	0	0	2	0	0	0.4	0	1	0	0	1	1	0	1	0	0	3	0	0	0
0	189	1	0	0	43	20090901	1	1	0	0	0	1	0	0	0.4	0	1	0	0	1	0	1	0	1	3	8	0	0	0
0	190	1	0	1	70	20090901	1	1	0	0	0	2	0	0	0.4	1	0	1	2	1	0	0	1	0	0	8	0	0	0
0	191	1	0	1	59	20090902	1	1	0	0	0	1	0	0	0.4	0	1	0	0	1	1	0	0	0	0	10	0	0	0
0	192	1	0	0	44	20090903	1	1	0	0	0	1	0	0	0.4	1	0	1	2	1	0	0	1	1	3	11	0	0	0
0	193	0	1	0	49	20090903	0	1	0	0	0	2	0	0	0.4	0	1	0	0	1	0	0	0	0	0	4	0	0	0
0	194	1	0	0	27	20090908	0	1	0	0	0	2	0	0	0.4	0	1	0	0	0	0	0	1	0	0	4	0	0	0
0	195	0	1	0	51	20090908	1	1	0	0	0	1	0	0	0.4	0	1	0	0	1	1	0	0	0	0	1	0	0	0
0	196	1	0	0	32	20090908	0	1	0	1	0	1	0	0	0.4	0	1	0	0	1	0	0	1	1	1	3	0	0	0
0	197	0	1	0	48	20090909	1	1	0	1	1	0	0	0	0.4	0	1	0	0	0	0	0	0	0	0	6	0	0	0
0	198	1	0	0	39	20090911	0	1	0	0	1	0	0	0	0.4	0	1	0	0	1	0	0	0	0	0	3	0	0	3
0	199	0	1	0	46	20090922	0	1	0	1	0	1	0	0	0.4	0	1	0	0	1	0	0	0	0	0	3	0	0	0
0	200	1	0	0	44	20090922	1	1	0	0	0	1	0	0	0.4	0	1	0	0	1	0	0	1	0	0	14	0	0	0
0	201	1	0	0	54	20090925	0	1	0	0	0	2	0	0	0.4	0	1	0	0	1	1	0	1	0	0	5	0	0	0
0	202	1	0	0	50	20090928	0	1	0	1	0	2	0	0	0.4	0	0	1	1	1	1	0	1	0	0	6	0	0	0
0	203	1	0	0	25	20090929	0	1	0	1	0	1	0	0	0.4	0	1	0	0	1	0	0	1	0	0	0	0	0	0
0	204	1	0	1	59	20090929	1	1	0	0	0	1	0	0	0.4	1	0	1	2	0	0	0	0	0	0	1	0	0	0
0	205	1	0	0	50	20090929	0	1	0	1	0	2	0	0	0.4	0	0	1	1	1	1	0	1	0	0	2	0	0	0
0	206	1	0	0	52	20090930	1	1	0	1	0	1	0	0	0.4	0	1	0	0	1	0	0	1	0	0	4	0	0	3
0	207	1	0	0	49	20091005	0	1	0	1	0	1	0	0	0.4	0	1	0	0	1	0	1	0	0	0	4	0	0	0
0	208	1	0	1	55	20091006	1	1	0	1	0	2	0	0	0.4	1	0	1	2	1	0	0	1	1	1	4	0	0	4
0	209	0	1	0	39	20091008	0	1	0	0	0	2	0	0	0.4	0	1	0	0	1	0	1	0	0	0	3	0	0	0
0	210	1	0	1	64	20091013	0	1	0	0	0	1	0	0	0.4	0	1	0	0	0	0	0	0	0	0	0	0	0	8
1	211	1	0	0	34	20091015	1	1	0	0	1	0	0	0	0.4	0	1	0	0	1	1	1	1	0	0	31	1	2	3
0	212	1	0	1	60	20091019	1	1	0	0	0	1	0	0	0.4	0	0	1	1	1	0	0	0	1	1	4	0	0	0
0	213	1	0	0	27	20091019	1	1	0	1	0	1	0	0	0.4	0	0	1	1	1	1	1	0	1	2	5	0	0	0
0	214	0	1	0	34	20091026	0	1	0	1	0	1	0	0	0.4	0	1	0	0	1	1	0	0	1	3	4	0	0	0
0	215	1	0	1	61	20091102	1	1	0	0	0	2	0	0	0.4	0	0	1	1	1	0	0	1	0	0	4	0	0	0
0	216	1	0	1	64	20091111	1	1	0	0	0	2	0	0	0.4	1	0	1	2	1	0	0	0	0	0	2	0	0	0
0	217	0	1	0	53	20091112	0	1	0	1	1	0	0	0	0.4	0	1	0	0	1	0	1	0	1	1	2	0	0	0
0	218	1	0	0	37	20091113	1	1	0	0	0	1	0	0	0.4	0	1	0	0	0	0	0	1	0	0	14	0	0	9
0	219	0	1	0	35	20091119	1	1	0	0	0	1	0	0	0.4	0	1	0	0	1	0	1	0	1	0.2	2	0	0	0
0	220	1	0	1	61	20091127	1	1	0	0	0	2	0	0	0.4	0	1	0	0	1	1	0	0	0	0	4	0	0	0
0	221	1	0	0	47	20091201	1	1	0	0	0	2	0	1	0.4	1	0	1	2	1	0	0	1	1	2	13	0	0	0
0	222	1	0	1	63	20091203	0	1	0	1	0	1	0	1	0.4	0	1	0	0	0	0	0	1	0	0	3	0	0	0
0	223	1	0	1	69	20091203	0	1	0	1	0	2	0	0	0.4	0	1	0	0	0	0	0	0	1	2	4	0	0	0
1	224	0	1	0	49	20091204	1	1	1	0	0	1	0	0	0.4	0	1	0	0	1	1	0	0	1	4	5	1	2	39
0	225	1	0	0	28	20091204	1	1	0	1	0	1	0	0	0.4	0	1	0	0	1	0	1	1	0	0	9	0	0	0
0	226	1	0	0	47	20091209	1	1	0	1	0	1	0	0	0.4	1	0	1	2	1	0	0	1	0	0	4	0	0	0
0	227	1	0	0	41	20091210	1	1	0	1	1	0	0	0	0.4	0	0	1	1	1	1	1	1	0	0	1	0	0	0
0	228	1	0	0	41	20091211	0	1	0	0	0	2	0	1	0.4	0	1	0	0	1	0	0	0	0	0	0	0	0	0
0	229	1	0	0	30	20091215	0	1	0	1	0	1	0	0	0.4	0	1	0	0	1	0	0	0	1	1	5	0	0	0
0	230	1	0	0	51	20091215	1	1	0	1	0	1	0	0	0.4	0	1	0	0	1	1	0	0	0	0	3	0	0	0
0	231	0	1	1	71	20091216	1	1	0	0	1	0	0	0	0.4	1	1	1	2	1	0	1	0	1	2	2	0	0	2
0	232	0	1	0	41	20091222	0	1	0	0	0	2	0	0	0.4	0	1	0	0	1	0	1	0	0	0	6	0	0	0
0	233	0	1	1	56	20091222	1	1	0	1	0	1	0	0	0.4	0	1	1	1	1	0	0	0	0	0	3	0	0	0
0	234	1	0	0	54	20091222	0	1	0	0	0	1	0	0	0.4	0	1	0	0	1	0	0	1	0	0	5	0	0	0
0	235	1	0	0	34	20091223	1	1	0	1	0	1	0	0	0.4	0	1	0	0	1	0	1	1	0	0	4	0	0	0
0	236	1	0	1	59	20091224	1	1	0	1	0	1	0	0	0.4	1	0	1	2	1	1	0	0	0	0	6	0	0	0
0	237	1	0	0	38	20091228	1	1	0	0	1	0	0	0	0.4	0	1	0	0	1	1	0	0	1	1	4	0	0	0
0	238	0	1	0	35	20090212	1	1	0	1	1	0	0	0	0.5	0	1	0	0	1	0	0	0	0	0	3	0	0	0
0	239	1	0	0	41	20090226	0	1	0	0	0	1	0	0	0.5	0	1	0	0	1	0	1	0	0	0	3	0	0	0
0	240	1	0	0	32	20090305	1	1	0	0	0	1	0	1	0.5	1	0	1	2	1	1	0	1	1	5	18	0	0	0
0	241	1	0	1	55	20090310	1	1	0	0	0	1	0	0	0.5	0	1	0	0	1	0	0	0	0	0	6	0	0	0
0	242	1	0	1	57	20090311	1	1	0	1	0	1	0	0	0.5	0	1	0	0	0	0	0	0	0	0	2	0	0	0
0	243	1	0	0	41	20090317	1	1	0	1	0	1	0	0	0.5	0	1	0	0	0	0	0	1	0	0	5	0	0	0
0	244	1	0	0	50	20090318	1	1	0	1	0	1	0	0	0.5	0	1	0	0	0	0	0	0	0	0	5	0	0	0
0	245	1	0	1	59	20090323	1	1	0	0	1	0	0	0	0.5	0	0	1	1	1	0	0	1	0	0	7	0	0	0
0	246	1	0	0	44	20090326	1	1	0	1	1	0	0	0	0.5	0	1	0	0	1	1	0	1	0	0	8	0	0	0
0	247	0	1	0	44	20090326	1	1	0	1	1	0	0	0	0.5	0	1	0	0	0	1	1	0	1	2	6	0	0	0
0	248	1	0	0	27	20090326	0	1	0	0	0	1	0	0	0.5	0	1	0	0	1	1	0	0	1	1	2	0	0	0
0	249	1	0	0	49	20090327	0	1	0	1	0	1	0	0	0.5	0	1	0	0	1	0	0	1	0	0	3	0	0	0
0	250	1	0	0	45	20090407	1	1	0	0	0	2	0	0	0.5	0	1	0	0	1	0	1	0	1	1	5	0	0	0
0	251	1	0	0	53	20090409	0	1	0	0	0	1	0	0	0.5	0	1	0	0	1	0	0	0	0	0	5	0	0	0
0	252	1	0	0	49	20090410	1	1	0	1	0	1	0	0	0.5	0	1	0	0	0	0	0	0	0	0	1	0	0	0
0	253	1	0	0	37	20090410	0	1	0	1	0	1	0	0	0.5	0	1	0	0	1	1	1	0	0	0	1	0	0	1
1	254	1	0	0	26	20090413	1	1	1	0	0	1	0	0	0.5	0	1	0	0	1	0	0	1	0	0	4	1	1	28
0	255	1	0	0	51	20090413	1	1	0	0	0	1	0	0	0.5	0	1	0	0	0	0	1	0	0	0	4	0	0	0
0	256	1	0	1	60	20090414	1	1	0	0	0	1	0	0	0.5	0	1	0	0	0	1	0	1	0	0	11	0	0	8
0	257	1	0	0	44	20090414	1	1	0	0	0	1	0	0	0.5	0	0	1	1	0	1	0	0	1	3	10	0	0	0
0	258	1	0	0	38	20090414	0	1	0	1	0	1	0	0	0.5	0	1	0	0	0	0	0	0	0	0	1	0	0	0
0	259	0	1	0	40	20090415	1	1	0	1	0	2	0	0	0.5	0	1	1	1	1	1	1	0	0	0	9	0	0	0
0	260	0	1	0	42	20090416	1	1	0	1	0	2	0	0	0.5	0	1	0	0	1	0	1	0	0	0	5	0	0	0
0	261	0	1	1	62	20090417	1	1	0	0	1	0	0	0	0.5	1	1	1	2	0	1	0	0	0	0	3	0	0	0
1	262	1	0	1	66	20090420	1	1	0	0	1	0	0	6	0.5	1	0	1	2	1	1	1	1	1	1	4	1	1	1
0	263	1	0	0	50	20090421	1	1	0	0	0	2	0	0	0.5	1	0	1	2	1	1	0	0	0	0	3	0	0	0
0	264	1	0	0	40	20090421	0	1	0	0	1	0	0	0	0.5	0	1	0	0	0	0	1	0	0	0	7	0	0	0
0	265	1	0	0	48	20090421	0	1	0	0	0	1	0	0	0.5	0	1	0	0	0	0	0	1	0	0	15	0	0	0
0	266	1	0	0	38	20090423	0	1	0	1	0	2	0	0	0.5	0	1	0	0	1	1	0	1	0	0	13	0	0	0
0	267	1	0	0	53	20090423	1	1	0	0	0	1	0	0	0.5	0	1	0	0	0	0	0	0	0	0	9	0	0	0
0	268	1	0	0	42	20090424	1	1	0	1	0	2	0	0	0.5	1	0	1	2	0	1	1	1	1	10	15	0	0	0
0	269	1	0	0	50	20090424	1	1	0	0	1	0	0	0	0.5	1	0	1	2	1	1	0	1	0	0	9	0	0	0
0	270	1	0	0	34	20090427	0	1	0	1	1	0	0	0	0.5	0	1	0	0	0	0	0	0	0	0	3	0	0	0
0	271	0	1	0	54	20090428	0	1	0	0	0	2	0	0	0.5	0	1	0	0	1	1	0	0	1	1	5	0	0	0
0	272	1	0	0	43	20090428	1	1	0	0	0	1	0	0	0.5	0	0	1	1	0	0	0	0	1	1	2	0	0	0
0	273	1	0	0	42	20090428	1	1	0	0	0	1	0	0	0.5	1	0	1	2	1	0	1	0	0	0	14	0	0	0
0	274	1	0	1	65	20090506	0	1	0	1	0	1	0	1	0.5	0	1	0	0	0	0	0	0	0	0	2	0	0	0
0	275	1	0	0	39	20090507	0	1	0	0	1	0	0	0	0.5	0	1	0	0	1	0	0	0	0	0	2	0	0	0
0	276	1	0	0	36	20090507	1	1	0	1	1	0	0	0	0.5	0	0	1	1	0	0	0	0	0	0	7	0	0	0
0	277	1	0	0	29	20090507	0	1	0	0	1	0	0	0	0.5	0	1	0	0	1	0	0	0	0	0	2	0	0	0
0	278	1	0	0	42	20090508	0	1	0	0	0	1	0	0	0.5	0	0	1	1	1	1	0	1	0	0	3	0	0	0
0	279	1	0	1	57	20090511	1	1	0	0	0	2	0	0	0.5	0	1	0	0	0	0	0	0	1	1	6	0	0	0
1	280	0	1	0	39	20090511	1	1	1	0	1	0	0	0	0.5	1	1	1	2	1	1	1	0	1	3	7	1	3	41
1	281	0	1	0	54	20090513	1	1	1	0	0	1	0	0	0.5	0	1	0	0	0	0	0	0	1	2	6	1	1	36
0	282	1	0	1	60	20090514	1	1	0	1	0	1	0	0	0.5	1	0	1	2	1	1	0	0	1	5	7	0	0	0
0	283	1	0	0	39	20090518	1	1	0	0	0	1	0	0	0.5	0	1	0	0	0	0	1	0	1	1	2	0	0	0
0	284	1	0	0	45	20090521	0	0	0	0	0	1	0	0	0.5	0	1	0	0	1	0	0	1	0	0	7	0	0	0
0	285	1	0	1	57	20090527	1	1	0	1	1	0	0	0	0.5	1	0	1	2	0	0	0	1	0	0	1	0	0	0
0	286	1	0	1	66	20090528	1	1	0	0	1	0	0	0	0.5	1	0	1	2	0	0	0	1	0	0	5	0	0	0
0	287	0	1	1	55	20090529	1	1	0	1	0	1	0	0	0.5	1	1	1	2	0	0	0	1	0	0	11	0	0	0
0	288	1	0	0	27	20090529	1	1	0	0	0	2	0	2	0.5	0	1	0	0	1	1	0	1	0	0	11	0	0	0
0	289	1	0	0	45	20090529	1	1	0	0	0	2	0	0	0.5	1	0	1	2	1	0	1	1	1	1	18	0	0	0
0	290	1	0	0	41	20090603	1	1	0	0	0	2	0	0	0.5	0	1	0	0	0	0	0	0	0	0	2	0	0	0
0	291	1	0	1	56	20090603	1	1	0	2	0	1	0	0	0.5	0	1	0	0	1	0	0	0	0	0	5	0	0	0
0	292	1	0	0	49	20090605	1	1	0	0	0	2	0	0	0.5	0	1	0	0	1	1	0	0	0	0	1	0	0	0
0	293	1	0	0	36	20090605	1	1	0	1	0	1	0	0	0.5	1	0	1	2	1	1	0	0	0	0	4	0	0	0
0	294	1	0	0	46	20090605	1	1	0	1	0	1	0	0	0.5	1	0	1	2	1	0	0	1	0	0	4	0	0	0
0	295	1	0	0	46	20090608	1	1	0	0	0	1	0	0	0.5	0	1	0	0	1	0	0	0	1	1	5	0	0	0
0	296	1	0	1	60	20090609	1	1	0	2	0	1	0	0	0.5	0	1	0	0	1	1	0	0	0	0	3	0	0	0
0	297	1	0	0	52	20090610	0	1	0	0	0	1	0	0	0.5	0	1	0	0	1	1	1	0	0	0	5	0	0	0
0	298	1	0	0	35	20090611	0	1	0	0	0	1	0	0	0.5	0	1	0	0	0	1	0	0	0	0	9	0	0	0
0	299	1	0	0	36	20090618	1	1	0	0	0	2	0	0	0.5	0	0	1	1	1	0	1	0	0	0	9	0	0	0
0	300	1	0	0	37	20090622	0	1	0	0	0	1	0	0	0.5	0	1	0	0	0	0	0	0	0	0	1	0	0	0
0	301	0	1	0	43	20090623	1	1	0	0	0	1	0	0	0.5	1	1	1	2	1	0	0	1	0	0	11	0	0	0
0	302	1	0	1	55	20090623	0	1	0	0	0	1	0	0	0.5	0	0	1	1	0	0	1	1	0	0	13	0	0	0
0	303	1	0	0	43	20090626	0	1	0	0	1	0	0	0	0.5	0	1	0	0	1	1	0	1	0	0	5	0	0	0
0	304	0	1	0	34	20090626	0	1	0	1	0	2	0	0	0.5	0	1	0	0	1	0	0	0	0	0	0/8	0	0	0
0	305	1	0	0	49	20090630	1	1	0	1	0	1	0	0	0.5	1	0	1	2	1	1	0	0	0	0	0	0	0	0
0	306	1	0	1	62	20090701	1	1	0	0	0	2	0	1	0.5	0	1	0	0	1	1	0	0	0	0	3	0	0	0
0	307	0	1	0	49	20090701	1	1	0	0	0	1	0	0	0.5	0	1	0	0	0	0	1	0	1	2	6	0	0	0
0	308	1	0	0	43	20090702	1	1	0	0	1	0	0	0	0.5	1	0	1	2	1	1	0	1	0	0	5	0	0	0
0	309	1	0	0	31	20090706	0	1	0	0	1	0	0	0	0.5	0	1	0	0	0	0	1	0	0	0	2	0	0	0
0	310	1	0	1	56	20090706	1	1	0	1	0	2	0	0	0.5	0	1	0	0	1	1	0	1	0	0	11	0	0	0
0	311	1	0	1	60	20090707	1	1	0	0	0	1	0	0	0.5	0	0	1	1	0	0	1	1	0	0	11	0	0	0
1	312	1	0	0	27	20090708	1	1	1	0	0	1	0	0	0.5	1	0	1	2	0	1	1	1	1	19	31	1	13	78
0	313	0	1	0	35	20090710	0	1	0	1	0	1	0	0	0.5	0	1	0	0	0	0	1	0	1	2	4	0	0	0
1	314	1	0	0	52	20090722	1	1	1	0	0	1	0	0	0.5	0	1	0	0	1	0	0	0	0	0	3	1	1	33
0	315	0	1	0	23	20090722	1	1	0	1	0	1	0	0	0.5	0	1	0	0	1	0	0	0	0	0	13	0	0	0
0	316	1	0	0	45	20090724	1	1	0	1	1	0	0	0	0.5	0	1	0	0	1	0	1	1	0	0	12	0	0	0
0	317	0	1	0	30	20090724	1	1	0	1	1	0	0	0	0.5	0	1	0	0	1	1	1	0	1	3	3	0	0	0
0	318	1	0	1	63	20090728	1	1	0	0	1	0	0	0	0.5	0	1	0	0	0	0	0	0	0	0	4	0	0	0
0	319	1	0	0	38	20090731	1	1	0	0	0	1	0	0	0.5	0	1	0	0	1	0	1	0	0	0	4	0	0	0
0	320	1	0	0	42	20090803	0	1	0	0	0	2	0	1	0.5	0	0	1	1	0	0	0	0	0	0	1	0	0	0
0	321	1	0	0	47	20090803	0	1	0	0	1	0	0	0	0.5	0	1	0	0	1	0	0	0	0	0	12	0	0	0
0	322	1	0	1	55	20090803	0	1	0	1	0	2	0	0	0.5	0	1	0	0	1	0	1	1	0	0	0	0	0	0
0	323	1	0	0	47	20090803	0	1	0	1	0	1	0	0	0.5	0	1	0	0	0	0	0	0	0	0	6	0	0	0
0	324	1	0	0	43	20090817	1	1	0	1	0	1	0	0	0.5	0	1	0	0	1	0	0	0	1	3	7	0	0	0
0	325	1	0	0	44	20090818	1	1	0	0	0	1	0	0	0.5	0	1	0	0	0	0	0	0	0	0	8	0	0	0
0	326	1	0	1	72	20090818	1	1	0	0	0	1	0	0	0.5	0	1	0	0	0	1	0	1	0	0	11	0	0	0
0	327	0	1	0	52	20090820	1	1	0	0	0	1	0	1	0.5	0	1	1	1	1	1	0	0	0	0	6	0	0	0
0	328	1	0	0	38	20090821	0	1	0	0	0	1	0	0	0.5	0	1	0	0	1	1	1	1	0	0	2	0	0	0
0	329	1	0	0	41	20090821	0	1	0	1	1	0	0	0	0.5	0	1	0	0	0	1	0	0	0	0	4	0	0	0
1	330	1	0	0	40	20090831	1	1	1	1	0	2	0	0	0.5	0	1	0	0	1	1	0	1	1	3	3	1	6	35
0	331	1	0	0	51	20090831	1	1	0	1	1	0	0	0	0.5	0	1	0	0	1	1	0	0	0	0	3	0	0	0
0	332	1	0	0	52	20090901	1	1	0	0	0	1	0	0	0.5	1	0	1	2	1	1	0	0	0	0	0	0	0	13
0	333	0	1	0	52	20090903	0	1	0	0	1	0	0	0	0.5	0	1	0	0	1	0	0	0	0	0	3	0	0	0
0	334	1	0	0	41	20090908	0	1	0	0	0	2	0	0	0.5	0	1	0	0	1	0	0	1	0	0	10	0	0	0
0	335	1	0	0	29	20090909	0	1	0	0	0	1	0	0	0.5	0	0	1	1	1	0	1	1	0	0	1	0	0	0
0	336	1	0	0	25	20090910	1	1	0	1	1	0	0	0	0.5	1	0	1	2	1	1	1	0	0	0	1	0	0	0
0	337	1	0	0	38	20090915	0	1	0	0	0	1	0	0	0.5	0	1	0	0	1	0	0	0	0	0	5	0	0	3
1	338	0	1	0	41	20090916	1	1	1	0	0	1	0	0	0.5	0	1	0	0	1	1	1	1	1	2	5	1	2	34
0	339	0	1	1	58	20090922	1	1	0	0	0	2	0	0	0.5	0	1	0	0	0	0	0	0	0	0	0	0	0	0
0	340	1	0	0	47	20090922	0	1	0	0	0	2	0	1	0.5	0	1	0	0	0	0	0	0	0	0	1	0	0	0
0	341	1	0	0	34	20090923	0	1	0	0	1	0	0	0	0.5	0	1	0	0	0	0	1	1	0	0	3	0	0	0
0	342	0	1	0	54	20090929	1	1	0	1	1	0	0	0	0.5	1	1	1	2	1	1	1	0	1	1	1	0	0	6
0	343	1	0	1	55	20091006	1	1	0	0	0	2	0	0	0.5	1	0	1	2	1	1	0	0	0	0	7	0	0	0
0	344	1	0	1	65	20091006	1	1	0	0	1	0	0	0	0.5	1	0	1	2	1	0	0	0	0	0	0	0	0	0
0	345	1	0	0	44	20091006	1	1	0	0	0	2	0	0	0.5	0	1	0	0	1	0	1	0	0	0	4	0	0	0
0	346	1	0	0	46	20091007	1	1	0	0	0	1	0	0	0.5	1	0	1	2	1	1	1	0	0	0	1	0	0	0
0	347	1	0	0	46	20091007	1	1	0	1	0	2	0	0	0.5	0	1	0	0	0	0	0	0	0	0	4	0	0	0
0	348	1	0	1	68	20091008	0	1	0	0	0	1	0	0	0.5	0	1	0	0	1	0	1	0	1	1	15	0	0	0
0	349	1	0	1	62	20091013	1	1	0	0	0	2	0	0	0.5	0	1	0	0	0	0	0	1	0	0	7	0	0	0
0	350	1	0	0	54	20091014	0	1	0	1	1	0	0	0	0.5	0	1	0	0	0	0	0	0	0	0	1	0	0	0
0	351	1	0	0	38	20091014	0	1	0	1	1	0	0	0	0.5	0	1	0	0	1	1	1	1	1	1	3	0	0	0
0	352	1	0	0	45	20091015	0	1	0	0	0	1	0	0	0.5	0	0	1	1	1	0	0	1	0	0	6	0	0	0
0	353	1	0	1	69	20091020	0	1	0	0	0	2	0	0	0.5	0	1	0	0	1	0	0	0	1	1	1	0	0	0
0	354	1	0	0	52	20091020	1	1	0	0	1	0	0	0	0.5	0	0	1	1	1	0	1	1	1	4	11	0	0	3
0	355	1	0	0	40	20091020	1	1	0	0	0	2	0	0	0.5	0	1	0	0	0	1	0	1	1	1	8	0	0	0
0	356	1	0	1	55	20091020	1	1	0	0	1	0	0	0	0.5	0	1	0	0	1	0	0	1	0	0	9	0	0	0
0	357	1	0	0	49	20091022	1	1	0	1	0	1	0	0	0.5	0	0	1	1	1	1	1	0	0	0	1	0	0	0
0	358	0	1	1	69	20091022	1	1	0	1	0	1	0	0	0.5	0	1	0	0	0	0	1	1	0	0	2	0	0	0
0	359	1	0	0	34	20091023	1	1	0	2	0	1	0	0	0.5	1	0	1	2	1	0	1	0	1	4	9	0	0	0
0	360	0	1	1	60	20091026	1	1	0	1	0	1	0	0	0.5	0	1	0	0	1	0	0	0	1	1	1	0	0	0
0	361	1	0	0	44	20091028	0	1	0	0	0	1	0	0	0.5	0	1	0	0	1	1	0	0	0	0	4	0	0	0
0	362	1	0	1	68	20091028	1	1	0	0	0	2	0	0	0.5	0	0	1	1	1	1	0	0	0	0	6	0	0	0
0	363	1	0	0	39	20091028	1	1	0	1	0	2	0	0	0.5	0	1	0	0	1	0	1	1	1	2	19	0	0	0
1	364	0	1	0	50	20091102	1	1	1	0	0	2	0	0	0.5	0	1	0	0	1	0	0	0	1	3	5	1	1	32
0	365	1	0	0	30	20091104	0	1	0	1	0	1	0	0	0.5	0	1	0	0	1	0	0	0	0	0	0	0	0	0
0	366	1	0	0	40	20091104	1	1	0	1	0	1	0	0	0.5	0	0	1	1	1	0	0	1	1	1	4	0	0	0
0	367	1	0	0	32	20091105	0	1	0	0	1	0	0	0	0.5	0	1	0	0	1	0	0	1	1	1	3	0	0	0
0	368	1	0	1	73	20091105	1	1	0	1	1	0	0	0	0.5	0	1	0	0	1	0	0	0	0	0	10	0	0	0
0	369	1	0	1	62	20091111	1	1	0	1	0	1	0	0	0.5	0	1	0	0	1	1	1	0	0	0	5	0	0	0
0	370	1	0	0	50	20091111	1	1	0	1	0	1	0	0	0.5	0	1	0	0	1	0	0	1	0	0	4	0	0	0
0	371	1	0	0	49	20091113	1	1	0	1	1	0	0	0	0.5	1	0	1	2	1	1	0	0	0	0	3	0	0	5
0	372	1	0	0	40	20091113	0	1	0	1	0	2	0	0	0.5	0	1	0	0	1	1	0	0	0	0	4	0	0	0
0	373	0	1	0	54	20091116	1	1	0	0	0	1	0	0	0.5	0	1	1	1	1	0	0	0	0	0	5	0	0	0
0	374	1	0	0	48	20091119	1	1	0	0	0	1	0	0	0.5	0	0	1	1	1	1	1	1	0	0	10	0	0	0
0	375	0	1	0	42	20091123	1	1	0	0	1	0	0	0	0.5	0	1	0	0	1	1	0	1	1	2	10	0	0	0
0	376	1	0	0	32	20091123	1	1	0	0	0	1	0	0	0.5	0	1	0	0	1	1	0	1	1	3	14	0	0	0
0	377	1	0	0	34	20091126	0	1	0	0	0	1	0	0	0.5	0	1	0	0	1	0	0	0	0	0	6	0	0	0
0	378	1	0	0	35	20091126	1	1	0	0	0	1	0	0	0.5	0	1	0	0	1	0	0	0	0	0	1	0	0	0
0	379	0	1	0	35	20091126	0	1	0	1	0	1	0	0	0.5	0	1	0	0	1	0	0	0	1	2	5	0	0	0
0	380	1	0	0	48	20091126	0	0	0	0	0	1	0	0	0.5	0	1	0	0	1	0	0	0	0	0	1	0	0	0
0	381	0	1	1	77	20091130	0	1	0	0	0	1	0	0	0.5	0	1	0	0	0	0	0	0	0	0	1	0	0	0
0	382	1	0	0	41	20091201	1	1	0	0	0	1	0	0	0.5	1	0	1	2	0	0	1	0	0	0	10	0	0	0
0	383	1	0	0	40	20091201	1	1	0	1	0	1	0	0	0.5	0	1	0	0	1	1	0	0	0	0	7	0	0	5
0	384	1	0	0	53	20091204	1	1	0	1	0	1	0	0	0.5	1	0	1	2	1	0	0	0	1	1	1	0	0	0
0	385	1	0	0	48	20091204	1	1	0	0	0	2	0	0	0.5	0	1	0	0	1	1	1	0	0	0	0	0	0	0
0	386	1	0	0	41	20091204	0	1	0	1	1	0	0	0	0.5	0	1	0	0	1	1	0	0	0	0	1	0	0	0
0	387	1	0	0	45	20091207	1	1	0	1	0	2	0	0	0.5	1	0	1	2	1	1	1	1	0	0	7	0	0	0
0	388	1	0	0	50	20091207	1	1	0	0	0	1	0	0	0.5	0	1	0	0	1	1	0	0	0	0	5	0	0	0
0	389	0	1	0	36	20091211	0	1	0	1	0	1	0	0	0.5	0	1	0	0	1	0	1	0	1	1	3	0	0	0
0	390	1	0	0	36	20091214	0	1	0	0	0	1	0	0	0.5	0	1	0	0	1	0	0	1	0	0	6	0	0	0
0	391	1	0	1	57	20091214	1	1	0	2	0	1	0	0	0.5	0	1	0	0	1	1	1	0	1	5	6	0	0	0
0	392	1	0	1	71	20091214	1	1	0	0	0	1	0	0	0.5	0	1	0	0	1	0	0	1	0	0	1	0	0	0
0	393	1	0	0	41	20091215	0	1	0	1	0	1	0	0	0.5	0	1	0	0	0	0	0	0	0	0	1	0	0	4
0	394	0	1	1	55	20091216	1	1	0	0	0	1	0	0	0.5	0	1	1	1	1	0	0	1	0	0	4	0	0	3
0	395	1	0	0	33	20091216	0	1	0	0	1	0	0	0	0.5	0	0	1	1	1	1	0	0	1	4	4	0	0	0
0	396	1	0	0	32	20091217	1	1	0	1	0	1	0	0	0.5	0	1	0	0	1	1	0	1	1	1	5	0	0	0
0	397	1	0	1	67	20091218	0	1	0	0	0	1	0	0	0.5	0	1	0	0	1	0	0	1	0	0	7	0	0	0
0	398	1	0	1	57	20091218	1	1	0	0	0	1	0	0	0.5	0	1	0	0	1	0	0	1	0	0	6	0	0	0
0	399	1	0	0	54	20091221	1	1	0	0	1	0	0	0	0.5	1	0	1	2	1	1	0	1	0	0	8	0	0	0
0	400	1	0	0	43	20091221	0	1	0	0	1	0	0	0	0.5	0	1	0	0	1	0	0	0	0	0	2	0	0	0
0	401	1	0	0	30	20091228	1	1	0	0	0	2	0	0	0.5	1	0	1	2	1	0	1	1	1	2	15	0	0	0
0	402	1	0	0	50	20091228	1	1	0	2	0	1	0	1	0.5	1	0	1	2	1	1	0	1	0	0	4	0	0	0
0	403	1	0	1	55	20091229	1	1	0	1	0	1	0	0	0.5	0	1	0	0	1	0	0	0	0	0	0	0	0	0
0	404	1	0	0	33	20091229	0	1	0	1	0	1	0	0	0.5	0	1	0	0	1	0	0	0	0	0	5	0	0	0
0	405	1	0	0	51	20091230	0	1	0	1	0	1	0	0	0.5	0	1	0	0	1	1	1	0	0	0	3	0	0	0
0	406	1	0	0	54	20100721	0	1	0	1	0	1	0	0	0.015	0	0	1	1	1	0	0	1	0	0	0	0	0	0
0	407	1	0	0	36	20100611	0	1	0	0	0	1	0	0	0.1	0	1	0	0	1	0	0	0	1	1	1	0	0	0
0	408	1	0	0	36	20100825	1	1	0	0	1	0	0	0	0.1	1	0	1	2	0	0	0	0	0	0	6	0	0	0
0	409	1	0	0	37	20100817	0	1	0	1	0	1	0	0	0.1	0	1	0	0	1	0	0	1	0	0	0	0	0	0
0	410	1	0	0	37	20101027	0	1	0	1	1	0	0	0	0.1	0	1	0	0	1	0	0	0	0	0	3	0	0	0
0	411	0	1	0	38	20100429	1	1	0	1	1	0	0	0	0.1	0	1	0	0	1	1	0	0	0	0	1	0	0	0
0	412	1	0	0	39	20100614	0	1	0	1	0	1	0	0	0.1	0	1	0	0	1	0	0	0	1	1	1	0	0	0
0	413	0	1	0	40	20101202	0	1	0	0	0	2	0	0	0.1	0	1	0	0	1	0	0	0	0	0	0	0	0	0
0	414	1	0	0	42	20100908	0	1	0	1	0	2	0	0	0.1	0	1	0	0	1	0	0	1	0	0	2	0	0	0
0	415	1	0	0	48	20100201	0	1	0	0	0	1	0	0	0.1	0	0	1	1	1	0	0	0	0	0	5	0	0	0
0	416	1	0	0	48	20100913	1	1	0	0	1	0	0	0	0.1	0	1	0	0	1	0	0	1	0	0	11	0	0	0
0	417	1	0	0	51	20100603	1	1	0	1	1	0	0	0	0.1	0	1	0	0	1	0	1	0	1	1	5	0	0	0
0	418	1	0	1	63	20100120	0	1	0	1	0	1	0	0	0.1	0	1	0	0	1	0	0	1	0	0	4	0	0	0
0	419	1	0	0	50	20100720	1	1	0	0	1	0	0	0	0.15	0	1	0	0	1	1	0	0	0	0	3	0	0	0
0	420	0	1	0	23	20100125	0	1	0	1	0	1	0	0	0.2	0	1	0	0	1	0	1	0	1	2	3	0	0	0
0	421	1	0	0	28	20100119	1	1	0	0	1	0	0	0	0.2	0	1	0	0	0	0	0	0	0	0	5	0	0	0
0	422	1	0	0	28	20100415	0	1	0	1	0	1	0	0	0.2	0	1	0	0	1	0	0	0	0	0	0	0	0	0
0	423	1	0	0	28	20100803	0	1	0	0	0	1	0	0	0.2	0	1	0	0	0	0	0	1	0	0	2	0	0	0
0	424	0	1	0	32	20100127	0	1	0	1	0	1	0	0	0.2	0	1	0	0	1	0	1	0	0	0	1	0	0	0
0	425	1	0	0	34	20100817	0	1	0	1	1	0	0	0	0.2	0	1	0	0	0	0	0	0	0	0	0	0	0	0
0	426	1	0	0	34	20101125	1	1	0	1	1	0	0	0	0.2	0	1	0	0	1	0	0	1	0	0	10	0	0	0
0	427	1	0	0	34	20101221	1	1	0	0	0	1	0	0	0.2	0	1	0	0	0	0	0	1	0	0	9	0	0	2
0	428	1	0	0	35	20100212	0	1	0	1	0	1	0	0	0.2	0	1	0	0	1	0	0	1	0	0	3	0	0	0
0	429	1	0	0	35	20100423	0	1	0	1	0	1	0	0	0.2	0	1	0	0	1	1	0	0	1	1	1	0	0	0
0	430	1	0	0	36	20100212	0	1	0	0	1	0	0	0	0.2	0	1	0	0	1	0	1	1	0	0	8	0	0	0
0	431	1	0	0	36	20100319	1	1	0	0	0	1	0	0	0.2	0	1	0	0	1	0	0	0	0	0	5	0	0	0
0	432	1	0	0	36	20100909	1	1	0	0	0	2	0	0	0.2	0	1	0	0	1	0	0	1	0	0	2	0	0	0
0	433	0	1	0	36	20100920	0	1	0	0	1	0	0	0	0.2	0	1	1	1	0	0	0	0	0	0	0	0	0	0
0	434	1	0	0	37	20100217	0	1	0	0	0	1	0	0	0.2	0	1	0	0	1	0	0	1	0	0	4	0	0	0
0	435	1	0	0	37	20100413	1	1	0	0	0	2	0	0	0.2	0	1	0	0	1	0	0	0	0	0	3	0	0	0
0	436	0	1	0	38	20100225	0	1	0	0	0	1	0	0	0.2	0	1	1	1	1	0	0	0	0	0	2	0	0	0
0	437	1	0	0	38	20100708	0	1	0	1	1	0	0	0	0.2	0	0	1	1	1	0	0	0	0	0	1	0	0	0
0	438	1	0	0	38	20100915	1	1	0	0	1	0	0	0	0.2	0	1	0	0	0	0	0	1	1	4	11	0	0	0
0	439	0	1	0	38	20101013	0	1	0	0	1	0	0	0	0.2	0	1	0	0	0	0	0	0	0	0	1	0	0	0
0	440	0	1	0	39	20100805	0	1	0	1	0	1	0	0	0.2	0	1	0	0	1	0	0	0	0	0	5	0	0	0
0	441	1	0	0	40	20100217	0	1	0	0	0	2	0	0	0.2	0	1	0	0	1	0	0	0	0	0	0	0	0	0
0	442	1	0	0	40	20100315	0	1	0	1	1	0	0	0	0.2	0	1	0	0	0	0	0	0	0	0	4	0	0	0
0	443	1	0	0	40	20100519	0	1	0	1	0	1	0	0	0.2	0	1	0	0	1	0	0	0	0	0	1	0	0	0
0	444	1	0	0	40	20101027	0	1	0	0	0	1	0	0	0.2	0	1	0	0	0	0	0	0	0	0	8	0	0	0
0	445	1	0	0	41	20100226	0	1	0	0	0	2	0	0	0.2	0	1	0	0	1	0	0	0	0	0	0	0	0	0
0	446	1	0	0	41	20100804	0	1	0	0	0	1	0	0	0.2	0	1	0	0	1	0	0	0	0	0	3	0	0	0
0	447	1	0	0	41	20101207	0	1	0	1	0	1	0	0	0.2	0	1	0	0	1	0	0	1	0	0	3	0	0	2
0	448	1	0	0	42	20100824	0	1	0	0	0	1	0	0	0.2	0	1	0	0	0	0	0	0	0	0	4	0	0	0
0	449	1	0	0	42	20100902	0	1	0	0	1	0	0	0	0.2	0	1	0	0	0	0	0	0	0	0	0	0	0	0
0	450	1	0	0	42	20100908	0	1	0	0	1	0	0	0	0.2	0	1	0	0	1	0	0	0	0	0	3	0	0	0
0	451	1	0	0	43	20100310	0	1	0	0	0	2	0	0	0.2	0	0	1	1	1	0	1	0	0	0	1	0	0	0
0	452	1	0	0	43	20100525	1	1	0	0	0	2	0	0	0.2	0	1	0	0	1	0	0	0	0	0	0	0	0	0
0	453	1	0	0	43	20100622	0	1	0	0	0	1	0	0	0.2	0	1	0	0	1	0	0	0	0	0	1	0	0	0
0	454	0	1	0	44	20100504	0	1	0	1	0	2	0	0	0.2	0	1	0	0	0	0	0	0	1	1	1	0	0	0
0	455	1	0	0	44	20100729	0	1	0	0	0	1	0	0	0.2	0	1	0	0	1	0	0	0	1	1	4	0	0	0
0	456	1	0	0	45	20100104	0	1	0	0	1	0	0	0	0.2	0	1	0	0	1	0	0	1	0	0	7	0	0	0
0	457	1	0	0	45	20100318	0	1	0	0	0	1	0	0	0.2	0	1	0	0	0	0	1	1	0	0	11	0	0	0
0	458	1	0	0	45	20100524	1	1	0	0	0	1	0	0	0.2	0	1	0	0	1	0	0	0	0	0	5	0	0	0
0	459	1	0	0	45	20101012	0	1	0	1	1	0	0	0	0.2	0	1	0	0	0	0	0	0	0	0	0	0	0	0
0	460	1	0	0	46	20100427	0	1	0	1	0	1	0	0	0.2	0	1	0	0	1	0	0	0	0	0	4	0	0	0
0	461	1	0	0	46	20100507	1	1	0	1	0	1	0	0	0.2	0	1	0	0	1	0	0	0	0	0	2	0	0	0
0	462	1	0	0	46	20101012	1	1	0	1	0	2	0	0	0.2	0	1	0	0	1	0	0	1	0	0	9	0	0	0
0	463	0	1	0	47	20100407	1	1	0	1	0	2	0	0	0.2	0	1	0	0	1	0	0	0	0	0	2	0	0	0
0	464	1	0	0	47	20100510	0	1	0	0	0	1	0	0	0.2	0	1	0	0	1	0	0	0	0	0	1	0	0	0
0	465	0	1	0	47	20100706	1	1	0	0	0	1	0	0	0.2	0	1	0	0	0	0	0	0	0	0	1	0	0	0
0	466	1	0	0	48	20100310	1	1	0	2	0	1	0	0	0.2	0	1	0	0	1	1	1	0	0	0	2	0	0	0
0	467	0	1	0	48	20100407	1	1	0	0	0	2	0	0	0.2	0	1	0	0	1	0	1	0	0	0	0	0	0	0
0	468	1	0	0	49	20100122	0	1	0	1	1	0	0	0	0.2	0	0	1	1	1	1	0	0	0	0	1	0	0	0
0	469	1	0	0	49	20100127	0	1	0	1	0	2	0	0	0.2	0	1	0	0	1	0	0	0	0	0	0	0	0	0
0	470	1	0	0	49	20100209	0	1	0	1	0	1	0	0	0.2	0	1	0	0	1	0	0	0	0	0	2	0	0	0
0	471	1	0	0	49	20100210	0	1	0	0	0	2	0	0	0.2	0	1	0	0	1	0	0	0	0	0	0	0	0	0
0	472	1	0	0	49	20101029	0	1	0	0	0	1	0	0	0.2	0	1	0	0	1	0	0	1	1	1	9	0	0	0
0	473	1	0	0	49	20101230	1	1	0	1	0	1	0	0	0.2	0	0	1	1	1	0	0	0	0	0	3	0	0	0
0	474	0	1	0	50	20100111	0	1	0	1	0	1	0	0	0.2	0	1	0	0	1	0	0	0	0	0	3	0	0	0
0	475	1	0	0	50	20100316	1	1	0	1	0	1	0	0	0.2	0	1	0	0	1	0	0	0	0	0	2	0	0	0
0	476	1	0	0	50	20101110	0	1	0	1	0	2	0	0	0.2	0	1	0	0	1	0	0	0	0	0	2	0	0	0
0	477	1	0	0	51	20100302	1	1	0	0	0	1	0	0	0.2	0	0	1	1	1	0	1	1	0	0	7	0	0	0
0	478	1	0	0	51	20100906	0	1	0	0	0	1	0	0	0.2	0	0	1	1	1	0	0	1	0	0	7	0	0	0
0	479	1	0	0	52	20100309	0	1	0	1	0	1	0	0	0.2	0	1	0	0	1	0	0	0	0	0	1	0	0	0
0	480	1	0	0	52	20100312	1	1	0	1	0	1	0	0	0.2	0	1	0	0	0	0	0	1	0	0	9	0	0	0
0	481	1	0	0	52	20100621	0	1	0	1	1	0	0	0	0.2	0	0	1	1	1	0	0	1	0	0	7	0	0	0
0	482	1	0	0	52	20100915	1	1	0	0	1	0	0	0	0.2	0	1	0	0	1	0	0	1	0	0	6	0	0	0
0	483	0	1	0	53	20100525	0	1	0	0	0	2	0	0	0.2	0	1	0	0	1	0	0	0	0	0	0	0	0	0
0	484	1	0	0	53	20100622	0	1	0	1	1	0	0	0	0.2	0	1	0	0	1	0	0	0	0	0	2	0	0	0
0	485	1	0	0	53	20100802	0	1	0	1	1	0	0	0	0.2	0	1	0	0	1	0	0	0	0	0	5	0	0	0
0	486	1	0	0	53	20100810	0	1	0	1	1	0	0	0	0.2	0	1	0	0	1	1	0	1	0	0	10	0	0	0
0	487	1	0	0	53	20100810	1	1	0	1	1	0	0	0	0.2	0	1	0	0	1	1	1	0	0	0	5	0	0	0
0	488	1	0	1	55	20100222	1	1	0	0	0	1	0	0	0.2	0	1	0	0	0	0	0	0	1	1	10	0	0	0
0	489	1	0	1	55	20100806	1	1	0	1	1	0	0	0	0.2	0	1	0	0	1	0	0	0	0	0	8	0	0	0
0	490	0	1	1	56	20100316	0	1	0	0	1	0	0	0	0.2	0	1	0	0	1	0	0	0	0	0	2	0	0	0
0	491	1	0	1	58	20100818	0	1	0	0	0	2	0	0	0.2	0	1	0	0	0	0	0	0	0	0	5	0	0	0
0	492	1	0	1	60	20100924	0	1	0	0	0	1	0	0	0.2	0	1	0	0	1	0	0	0	0	0	3	0	0	0
0	493	1	0	1	61	20100125	1	1	0	0	0	1	0	0	0.2	0	1	0	0	1	0	0	1	0	0	5	0	0	0
0	494	0	1	1	62	20100225	1	1	0	0	1	0	0	0	0.2	0	1	1	1	1	0	0	0	0	0	4	0	0	0
0	495	1	0	1	62	20100723	1	1	0	0	0	1	0	0	0.2	0	1	0	0	1	0	0	0	0	0	0	0	0	0
0	496	1	0	1	62	20100824	1	1	0	0	0	1	0	0	0.2	0	1	0	0	0	1	0	0	0	0	8	0	0	0
0	497	1	0	1	64	20101102	1	1	0	0	1	0	0	0	0.2	0	1	0	0	1	0	1	0	0	0	4	0	0	0
0	498	1	0	1	70	20100405	1	1	0	1	1	0	0	0	0.2	0	1	0	0	0	0	0	0	0	0	2	0	0	0
0	499	0	1	0	44	20100430	1	1	0	0	0	1	0	0	0.25	0	1	0	0	0	0	0	0	0	0	3	0	0	0
0	500	1	0	0	46	20100603	0	1	0	1	0	1	0	0	0.25	0	1	0	0	1	0	0	1	0	0	0	0	0	0
0	501	0	1	0	23	20100201	1	1	0	1	0	2	0	0	0.3	0	1	0	0	1	1	1	0	1	3	4	0	0	0
0	502	1	0	0	24	20100604	0	1	0	1	0	1	0	0	0.3	0	1	0	0	1	1	0	0	0	0	0	0	0	0
0	503	0	1	0	24	20100623	0	1	0	0	0	1	0	0	0.3	0	1	1	1	0	0	0	0	0	0	2	0	0	0
0	504	1	0	0	24	20100902	0	1	0	1	1	0	0	0	0.3	0	1	0	0	0	0	1	0	0	0	2	0	0	0
0	505	1	0	0	28	20100504	0	1	0	0	0	1	0	0	0.3	0	1	0	0	1	1	0	0	0	0	2	0	0	0
0	506	1	0	0	29	20100308	1	1	0	0	0	1	0	0	0.3	0	1	0	0	1	1	0	0	0	0	1	0	0	0
0	507	1	0	0	29	20100916	1	1	0	1	0	2	0	0	0.3	0	1	0	0	1	1	0	0	1	2	5	0	0	0
0	508	1	0	0	30	20100113	0	1	0	1	0	1	0	0	0.3	0	1	0	0	1	0	1	1	1	2	6	0	0	0
0	509	1	0	0	30	20100514	0	1	0	0	0	2	0	0	0.3	0	0	1	1	0	1	1	0	0	0	2	0	0	0
0	510	1	0	0	30	20100609	0	1	0	0	1	0	0	0	0.3	0	1	0	0	1	0	0	0	0	0	2	0	0	0
0	511	1	0	0	30	20101109	1	1	0	0	1	0	0	0	0.3	0	1	0	0	0	0	0	0	0	0	2	0	0	0
0	512	1	0	0	31	20100125	0	1	0	1	1	0	0	0	0.3	0	1	0	0	1	0	0	0	0	0	6	0	0	0
0	513	0	1	0	31	20100224	0	1	0	1	1	0	0	0	0.3	0	1	0	0	1	0	0	0	0	0	1	0	0	0
0	514	1	0	0	31	20100701	0	1	0	0	0	1	0	0	0.3	0	1	0	0	1	0	0	1	0	0	8	0	0	0
0	515	1	0	0	31	20101001	0	1	0	1	1	0	0	0	0.3	0	1	0	0	1	0	0	1	0	0	0	0	0	0
0	516	1	0	0	31	20101213	0	1	0	0	0	2	0	0	0.3	0	1	0	0	1	0	0	1	0	0	13	0	0	0
0	517	1	0	0	32	20100709	0	1	0	1	0	2	0	0	0.3	0	1	0	0	1	0	1	0	0	0	5	0	0	0
0	518	1	0	0	32	20100712	0	1	0	0	0	2	0	0	0.3	0	1	0	0	0	0	0	0	0	0	3	0	0	0
0	519	1	0	0	32	20100811	0	1	0	1	0	1	0	0	0.3	0	1	0	0	0	0	0	1	0	0	6	0	0	0
0	520	1	0	0	32	20100826	0	1	0	0	1	0	0	0	0.3	0	1	0	0	1	0	0	0	0	0	0	0	0	0
0	521	1	0	0	32	20101108	0	1	0	1	0	2	0	0	0.3	0	1	0	0	1	0	1	0	0	0	14	0	0	0
0	522	0	1	0	33	20100113	0	1	0	0	0	1	0	0	0.3	0	1	0	0	1	0	1	0	0	0	1	0	0	0
0	523	1	0	0	33	20100222	1	1	0	0	0	1	0	0	0.3	0	0	1	1	0	0	1	0	1	1	7	0	0	0
0	524	1	0	0	33	20100716	0	1	0	1	0	2	0	0	0.3	0	0	1	1	1	0	1	0	1	1	1	0	0	0
0	525	1	0	0	34	20100204	1	1	0	1	0	1	0	0	0.3	0	1	0	0	1	1	0	0	0	0	0	0	0	0
0	526	1	0	0	34	20101004	0	1	0	0	1	0	0	0	0.3	0	1	0	0	1	1	1	1	0	0	0	0	0	0
0	527	0	1	0	35	20100316	1	1	0	0	0	2	0	0	0.3	0	1	0	0	1	1	0	0	0	0	3	0	0	0
0	528	1	0	0	35	20101008	0	1	0	0	0	1	0	0	0.3	0	1	0	0	1	1	0	1	0	0	3	0	0	0
0	529	1	0	0	35	20101015	0	1	0	1	0	1	0	0	0.3	0	1	0	0	0	0	1	0	1	1	2	0	0	0
0	530	1	0	0	35	20101021	1	1	0	1	1	0	0	0	0.3	0	1	0	0	1	0	0	0	0	0	2	0	0	0
0	531	1	0	0	35	20101103	1	1	0	0	0	1	0	0	0.3	1	0	1	2	1	0	0	0	0	0	6	0	0	0
0	532	1	0	0	35	20101209	0	1	0	0	0	2	0	0	0.3	0	1	0	0	1	1	0	0	0	0	0	0	0	0
0	533	0	1	0	36	20100624	1	1	0	1	0	2	0	0	0.3	0	1	0	0	1	1	1	0	1	2	4	0	0	0
0	534	1	0	0	36	20101116	0	1	0	1	0	2	0	0	0.3	0	1	0	0	1	0	0	0	0	0	0	0	0	0
0	535	1	0	0	37	20100128	1	1	0	0	0	2	0	0	0.3	0	1	0	0	0	0	1	1	0	0	13	0	0	0
0	536	1	0	0	37	20100519	0	1	0	0	0	1	0	0	0.3	0	1	0	0	1	1	1	0	0	0	0	0	0	0
0	537	1	0	0	37	20100708	1	1	0	0	1	0	0	0	0.3	0	1	0	0	0	0	0	0	0	0	1	0	0	0
0	538	1	0	0	37	20100728	0	1	0	0	0	1	0	0	0.3	0	1	0	0	1	1	0	0	0	0	2	0	0	0
0	539	1	0	0	37	20101109	0	1	0	1	0	2	0	0	0.3	0	1	0	0	0	0	0	1	0	0	3	0	0	0
0	540	1	0	0	38	20100824	0	1	0	0	0	2	0	0	0.3	0	1	0	0	1	0	0	0	0	0	0	0	0	0
0	541	1	0	0	38	20101019	0	1	0	1	0	2	0	0	0.3	0	1	0	0	0	0	0	0	0	0	0	0	0	0
0	542	1	0	0	38	20101102	1	1	0	1	0	1	0	0	0.3	1	0	1	2	1	1	0	0	0	0	11	0	0	0
0	543	1	0	0	39	20100210	0	1	0	0	0	1	0	0	0.3	0	1	0	0	1	0	0	0	0	0	0	0	0	0
0	544	1	0	0	39	20100217	0	1	0	1	0	2	0	0	0.3	0	1	0	0	1	0	0	0	0	0	2	0	0	0
0	545	1	0	0	39	20100420	0	1	0	0	0	1	0	0	0.3	0	1	0	0	1	0	0	0	0	0	5	0	0	0
0	546	1	0	0	39	20100426	0	1	0	0	0	2	0	0	0.3	0	1	0	0	1	0	1	0	0	0	5	0	0	0
0	547	1	0	0	39	20100624	0	1	0	1	0	1	0	0	0.3	0	1	0	0	1	1	0	1	0	0	1	0	0	0
0	548	0	1	0	39	20100909	0	1	0	1	0	1	0	0	0.3	0	1	0	0	0	1	0	0	1	1	2	0	0	0
0	549	0	1	0	39	20101029	0	1	0	1	0	1	0	0	0.3	0	1	0	0	1	0	1	0	0	0	4	0	0	0
0	550	0	1	0	39	20101125	0	1	0	0	0	1	0	0	0.3	0	1	0	0	1	0	1	0	1	1	1	0	0	0
0	551	0	1	0	40	20100204	0	1	0	1	0	2	0	0	0.3	0	1	0	0	1	0	0	0	0	0	2	0	0	0
0	552	1	0	0	40	20100316	1	1	0	1	0	2	0	0	0.3	0	0	1	1	1	1	0	0	0	0	2	0	0	0
0	553	1	0	0	40	20100402	1	1	0	0	0	2	0	0	0.3	0	1	0	0	1	0	0	0	0	0	0	0	0	0
0	554	1	0	0	40	20100908	0	1	0	0	0	1	0	0	0.3	0	1	0	0	1	0	0	1	0	0	3	0	0	0
0	555	1	0	0	40	20101012	0	1	0	1	0	1	0	0	0.3	0	1	0	0	0	0	0	0	0	0	0	0	0	0
0	556	1	0	0	40	20101108	0	1	0	1	0	1	0	0	0.3	0	1	0	0	0	0	0	0	0	0	0	0	0	0
0	557	1	0	0	41	20100120	0	1	0	1	0	1	0	0	0.3	0	1	0	0	1	0	0	0	0	0	1	0	0	0
0	558	0	1	0	41	20100319	1	1	0	1	1	0	0	0	0.3	0	1	0	0	1	0	1	0	0	0	5	0	0	0
0	559	1	0	0	41	20100609	0	1	0	0	0	1	0	0	0.3	0	1	0	0	1	0	0	1	0	0	10	0	0	0
0	560	1	0	0	41	20100723	1	1	0	0	0	1	0	0	0.3	1	0	1	2	1	1	0	1	1	1	12	0	0	0
0	561	1	0	0	41	20100927	0	1	0	1	1	0	0	0	0.3	0	1	0	0	1	0	0	0	0	0	1	0	0	0
0	562	1	0	0	41	20101001	0	1	0	1	0	1	0	0	0.3	0	1	0	0	1	1	0	0	0	0	7	0	0	0
0	563	1	0	0	41	20101101	0	1	0	0	0	2	0	0	0.3	0	1	0	0	0	0	0	0	0	0	0	0	0	0
0	564	1	0	0	42	20100202	1	1	0	0	0	1	0	0	0.3	0	1	0	0	1	1	1	0	0	0	4	0	0	0
0	565	1	0	0	42	20100609	1	1	0	0	0	1	0	0	0.3	0	1	0	0	1	0	0	1	1	1	10	0	0	0
0	566	1	0	0	42	20100805	0	1	0	0	0	2	0	0	0.3	0	1	0	0	1	1	0	0	0	0	4	0	0	0
0	567	0	1	0	42	20100907	1	1	0	0	1	0	0	0	0.3	0	1	0	0	1	0	1	0	1	4	4	0	0	0
0	568	1	0	0	42	20101108	1	1	0	0	0	2	0	0	0.3	1	0	1	2	1	0	0	1	0	0	0	0	0	0
0	569	1	0	0	42	20101231	1	1	0	1	0	2	0	1	0.3	0	1	0	0	0	0	0	0	0	0	1	0	0	0
0	570	1	0	0	43	20100412	0	1	0	0	0	2	0	0	0.3	0	1	0	0	1	0	0	0	0	0	5	0	0	0
0	571	1	0	0	43	20100611	0	1	0	0	0	1	0	0	0.3	0	1	0	0	0	0	0	0	0	0	10	0	0	0
0	572	1	0	0	43	20100720	0	1	0	0	1	0	0	0	0.3	0	1	0	0	1	0	0	0	0	0	3	0	0	0
0	573	1	0	0	43	20101108	1	1	0	0	1	0	0	0	0.3	0	1	0	0	1	1	0	1	1	4	8	0	0	0
0	574	1	0	0	43	20101108	1	1	0	2	0	1	0	0	0.3	1	0	1	2	1	0	0	0	0	0	1	0	0	0
0	575	1	0	0	44	20100128	1	1	0	1	0	1	0	0	0.3	0	1	0	0	1	1	0	1	0	0	6	0	0	0
0	576	0	1	0	44	20100208	1	1	0	1	1	0	0	0	0.3	0	1	1	1	1	0	1	0	1	1	7	0	0	0
0	577	0	1	0	44	20100212	1	1	0	0	1	0	0	0	0.3	0	1	0	0	1	0	0	1	0	0	9	0	0	0
0	578	1	0	0	44	20100624	1	1	0	0	1	0	0	0	0.3	0	1	0	0	1	0	0	1	0	0	2	0	0	0
0	579	1	0	0	44	20100726	0	1	0	0	0	1	0	0	0.3	0	1	0	0	1	0	0	0	0	0	4	0	0	0
0	580	1	0	0	45	20100223	1	1	0	1	0	2	0	0	0.3	0	1	0	0	1	0	1	0	0	0	5	0	0	0
0	581	0	1	0	45	20100223	0	1	0	0	0	1	0	0	0.3	0	1	0	0	0	0	1	0	1	6	9	0	0	0
0	582	0	1	0	45	20100312	0	1	0	0	1	0	0	0	0.3	0	1	0	0	1	1	0	0	0	0	2	0	0	0
0	583	1	0	0	45	20100630	1	1	0	0	0	1	0	0	0.3	0	1	0	0	1	0	1	0	0	0	1	0	0	0
0	584	1	0	0	45	20100901	1	1	0	2	0	1	0	0	0.3	0	1	0	0	0	0	1	1	0	0	1	0	0	0
0	585	1	0	0	45	20100917	0	1	0	0	0	1	0	0	0.3	0	1	0	0	1	0	0	1	0	0	1	0	0	0
0	586	1	0	0	45	20101007	0	1	0	1	0	1	0	0	0.3	0	1	0	0	1	0	0	1	0	0	1	0	0	0
0	587	1	0	0	45	20101008	1	1	0	0	1	0	0	0	0.3	0	1	0	0	1	1	0	1	0	0	0	0	0	0
0	588	1	0	0	45	20101013	0	1	0	0	0	1	0	0	0.3	0	1	0	0	0	0	0	0	1	1	2	0	0	0
0	589	1	0	0	46	20100707	0	1	0	0	0	1	0	0	0.3	0	1	0	0	1	0	0	0	0	0	3	0	0	0
0	590	1	0	0	46	20101001	0	1	0	0	0	1	0	0	0.3	0	1	0	0	0	0	0	0	0	0	2	0	0	0
0	591	1	0	0	46	20101130	0	1	0	0	0	1	0	0	0.3	0	1	0	0	1	0	0	0	0	0	3	0	0	0
0	592	1	0	0	47	20100303	0	1	0	1	0	1	0	0	0.3	0	1	0	0	1	0	0	0	0	0	1	0	0	0
0	593	0	1	0	47	20100415	0	1	0	1	0	1	0	0	0.3	0	1	0	0	1	0	0	0	0	0	2	0	0	0
0	594	0	1	0	47	20100423	0	1	0	0	0	2	0	0	0.3	0	1	0	0	1	0	0	0	0	0	1	0	0	0
0	595	1	0	0	47	20100818	0	1	0	0	0	1	0	0	0.3	0	1	0	0	0	0	0	1	0	0	8	0	0	0
0	596	1	0	0	47	20100831	0	1	0	1	0	1	0	0	0.3	0	1	0	0	1	0	0	1	0	0	7	0	0	0
0	597	1	0	0	47	20100902	1	1	0	1	0	1	0	0	0.3	0	1	0	0	1	0	0	1	0	0	0	0	0	0
0	598	1	0	0	47	20101108	0	1	0	1	0	2	0	0	0.3	0	1	0	0	1	1	0	1	0	0	3	0	0	0
0	599	1	0	0	48	20100118	1	1	0	1	1	0	0	0	0.3	0	1	0	0	0	0	0	1	0	0	3	0	0	0
0	600	1	0	0	48	20101207	1	1	0	1	0	1	0	0	0.3	0	1	0	0	1	0	0	0	1	2	7	0	0	0
0	601	1	0	0	49	20100405	1	1	0	1	0	1	0	0	0.3	0	1	0	0	1	1	0	1	0	0	5	0	0	0
0	602	0	1	0	49	20100510	1	1	0	1	1	0	0	0	0.3	1	1	1	2	1	1	0	0	0	0	1	0	0	0
0	603	1	0	0	49	20100706	1	1	0	0	0	2	0	0	0.3	1	0	1	2	1	0	0	0	0	0	5	0	0	0
0	604	1	0	0	49	20100827	0	1	0	1	1	0	0	0	0.3	0	1	0	0	0	0	0	0	0	0	1	0	0	0
0	605	1	0	0	49	20100902	1	1	0	0	0	1	0	0	0.3	0	0	1	1	1	1	1	0	0	0	3	0	0	0
0	606	1	0	0	49	20100916	1	1	0	2	1	0	0	0	0.3	1	0	1	2	1	0	0	0	0	0	1	0	0	0
0	607	1	0	0	49	20101102	0	1	0	1	1	0	0	0	0.3	0	1	0	0	0	1	0	1	0	0	10	0	0	0
0	608	1	0	0	49	20101108	1	1	0	0	0	1	0	0	0.3	1	0	1	2	0	0	0	0	0	0	4	0	0	0
0	609	1	0	0	49	20101209	0	1	0	0	0	2	0	0	0.3	0	1	0	0	1	0	0	1	0	0	13	0	0	0
0	610	1	0	0	50	20100305	0	1	0	0	0	2	0	0	0.3	0	1	0	0	1	0	0	1	0	0	1	0	0	0
0	611	1	0	0	50	20100902	0	1	0	1	0	1	0	0	0.3	0	0	1	1	1	1	0	0	0	0	1	0	0	0
0	612	1	0	0	50	20101027	0	1	0	1	1	0	0	0	0.3	0	1	0	0	0	1	1	1	0	0	1	0	0	0
0	613	1	0	0	51	20100104	1	1	0	0	1	0	0	0	0.3	0	1	0	0	1	1	1	1	0	0	8	0	0	0
0	614	1	0	0	51	20100107	0	1	0	0	0	1	0	0	0.3	0	1	0	0	1	1	0	0	0	0	7	0	0	0
0	615	1	0	0	51	20100524	1	1	0	0	1	0	0	0	0.3	0	1	0	0	1	0	0	0	0	0	0	0	0	0
0	616	1	0	0	51	20100806	1	1	0	1	0	1	0	0	0.3	0	1	0	0	1	0	0	1	1	4	4	0	0	0
0	617	1	0	0	51	20100811	1	1	0	0	1	0	0	0	0.3	0	1	0	0	1	0	1	1	0	0	1	0	0	0
0	618	1	0	0	51	20100927	0	1	0	1	1	0	0	0	0.3	0	1	0	0	1	0	0	0	1	1	1	0	0	0
0	619	0	1	0	51	20101012	0	1	0	1	1	0	0	0	0.3	0	1	0	0	1	1	0	0	0	0	0	0	0	0
0	620	1	0	0	52	20100204	0	1	0	1	0	1	0	0	0.3	0	1	0	0	1	1	0	0	0	0	0	0	0	0
0	621	1	0	0	52	20100312	0	1	0	0	0	1	0	0	0.3	0	1	0	0	0	0	0	0	0	0	2	0	0	0
0	622	1	0	0	52	20100812	1	1	0	1	0	2	0	0	0.3	0	1	0	0	1	1	0	0	0	0	4	0	0	0
0	623	1	0	0	52	20100908	0	1	0	0	0	1	0	0	0.3	0	1	0	0	1	0	1	1	0	0	3	0	0	0
0	624	1	0	0	52	20100910	1	1	0	0	0	1	0	0	0.3	0	1	0	0	0	0	0	0	0	0	4	0	0	0
0	625	1	0	0	52	20101109	0	1	0	0	0	1	0	0	0.3	0	0	1	1	0	0	0	0	0	0	2	0	0	0
0	626	1	0	0	52	20101207	0	1	0	0	0	1	0	0	0.3	0	1	0	0	1	0	0	0	0	0	5	0	0	0
0	627	1	0	0	53	20100517	0	1	0	0	0	1	0	0	0.3	0	1	0	0	1	1	0	0	1	1	3	0	0	0
0	628	1	0	0	53	20100719	1	1	0	2	0	1	0	0	0.3	0	0	1	1	1	0	0	0	0	0	3	0	0	0
0	629	1	0	0	53	20100730	0	1	0	1	0	1	0	0	0.3	0	1	0	0	1	0	0	1	0	0	4	0	0	0
0	630	1	0	0	53	20100813	0	1	0	0	0	1	0	0	0.3	0	0	1	1	1	1	0	1	0	0	1	0	0	0
0	631	1	0	0	53	20101004	1	1	0	1	0	2	0	0	0.3	0	1	0	0	1	0	0	0	0	0	1	0	0	0
0	632	1	0	0	53	20101021	1	1	0	1	1	0	0	0	0.3	0	1	0	0	1	1	0	0	0	0	4	0	0	1
0	633	1	0	0	54	20101011	1	1	0	1	0	2	0	0	0.3	0	1	0	0	1	0	0	0	0	0	3	0	0	5
0	634	1	0	1	55	20100603	0	1	0	1	0	1	0	0	0.3	0	1	0	0	1	0	0	0	0	0	1	0	0	0
0	635	1	0	1	55	20100719	1	1	0	0	0	1	0	1	0.3	1	0	1	2	0	0	0	1	0	0	7	0	0	0
0	636	1	0	1	55	20100729	1	1	0	0	1	0	0	0	0.3	1	0	1	2	1	0	0	0	0	0	1	0	0	0
0	637	1	0	1	56	20100106	1	1	0	0	0	1	0	0	0.3	0	1	0	0	0	0	0	0	0	0	0	0	0	0
0	638	1	0	1	56	20100526	0	1	0	0	0	1	0	0	0.3	0	1	0	0	1	0	0	0	0	0	6	0	0	0
0	639	1	0	1	56	20101103	0	1	0	0	1	0	0	0	0.3	0	1	0	0	1	0	0	1	0	0	16	0	0	0
0	640	1	0	1	57	20100512	1	1	0	0	0	1	0	0	0.3	0	0	1	1	1	0	0	1	0	0	0	0	0	0
0	641	0	1	1	58	20100401	0	1	0	1	0	1	0	0	0.3	0	1	0	0	1	1	0	0	0	0	1	0	0	0
0	642	1	0	1	58	20100512	1	1	0	0	0	1	0	0	0.3	1	0	1	2	1	1	1	0	0	0	2	0	0	0
0	643	1	0	1	58	20100601	0	1	0	0	0	1	0	0	0.3	0	1	0	0	1	1	0	0	0	0	1	0	0	0
0	644	0	1	1	58	20100804	1	1	0	0	0	1	0	0	0.3	0	1	0	0	1	1	1	0	1	1	1	0	0	67
0	645	1	0	1	58	20100810	1	1	0	0	0	1	0	0	0.3	0	1	0	0	0	0	0	1	0	0	14	0	0	0
0	646	0	1	1	58	20101111	1	1	0	1	0	1	0	0	0.3	1	1	1	2	1	0	0	0	0	0	1	0	0	0
0	647	1	0	1	59	20100707	1	1	0	1	0	1	0	0	0.3	0	1	0	0	1	1	0	0	0	0	1	0	0	0
0	648	1	0	1	60	20101029	0	1	0	0	0	1	0	0	0.3	0	1	0	0	1	0	0	0	0	0	9	0	0	0
0	649	1	0	1	60	20101109	0	1	0	1	0	2	0	0	0.3	0	1	0	0	1	0	0	1	0	0	9	0	0	0
0	650	1	0	1	63	20100915	1	1	0	0	0	1	0	0	0.3	1	0	1	2	0	0	0	1	1	4	9	0	0	0
0	651	1	0	1	63	20101206	0	1	0	0	1	0	0	0	0.3	0	1	0	0	0	1	0	0	0	0	0	0	0	0
0	652	1	0	1	64	20100107	1	1	0	1	0	2	0	0	0.3	0	0	1	1	1	0	0	1	0	0	9	0	0	0
0	653	1	0	1	64	20100120	1	1	0	1	1	0	0	0	0.3	1	0	1	2	1	0	0	0	0	0	2	0	0	0
0	654	1	0	1	64	20100517	0	1	0	1	0	1	0	1	0.3	0	0	1	1	0	0	0	0	0	0	0	0	0	0
0	655	1	0	1	65	20100114	0	1	0	0	0	1	0	0	0.3	0	1	0	0	1	1	0	0	0	0	2	0	0	0
0	656	1	0	1	65	20100414	1	1	0	1	1	0	0	0	0.3	0	1	0	0	1	1	0	0	0	0	3	0	0	0
1	657	1	0	1	66	20100621	1	1	1	1	1	0	0	0	0.3	0	0	1	1	1	0	0	1	0	0	8	1	3	35
0	658	0	1	1	66	20100701	1	1	0	0	1	0	0	0	0.3	0	1	0	0	1	0	0	0	0	0	0	0	0	0
0	659	1	0	1	66	20100714	1	1	0	0	0	1	0	0	0.3	0	1	0	0	1	0	1	0	0	0	0	0	0	0
0	660	1	0	1	68	20100120	1	1	0	1	1	0	0	0	0.3	0	1	0	0	0	1	1	1	0	0	8	0	0	0
0	661	1	0	1	69	20100302	0	1	0	1	0	1	0	0	0.3	0	0	1	1	1	0	1	0	0	0	1	0	0	0
0	662	1	0	1	69	20100706	1	1	0	1	0	1	0	0	0.3	0	0	1	1	1	1	0	0	0	0	2	0	0	0
0	663	0	1	1	70	20100414	1	1	0	0	0	1	0	0	0.3	0	1	0	0	1	0	0	0	0	0	0	0	0	0
0	664	1	0	0	22	20100809	0	1	0	1	0	1	0	0	0.4	0	1	0	0	1	0	0	0	0	0	1	0	0	0
0	665	1	0	0	24	20100325	0	1	0	0	0	1	0	0	0.4	0	1	0	0	0	0	0	0	0	0	0	0	0	0
0	666	1	0	0	26	20100519	0	1	0	0	0	1	0	0	0.4	0	1	0	0	1	1	1	0	0	0	0	0	0	0
0	667	1	0	0	26	20100617	1	1	0	1	0	1	0	0	0.4	0	1	0	0	1	0	0	0	0	0	6	0	0	0
0	668	1	0	0	27	20100323	0	1	0	0	0	2	0	0	0.4	0	1	0	0	1	0	0	1	1	1	2	0	0	0
0	669	0	1	0	27	20100816	0	1	0	0	0	1	0	0	0.4	0	1	0	0	0	0	0	0	0	0	0	0	0	0
0	670	1	0	0	28	20100106	0	1	0	1	0	1	0	0	0.4	0	1	0	0	1	0	0	0	0	0	0	0	0	0
0	671	1	0	0	29	20100308	1	1	0	0	0	2	0	0	0.4	0	1	0	0	1	0	1	0	1	1	1	0	0	0
1	672	1	0	0	29	20100615	1	1	1	1	0	1	0	0	0.4	0	0	1	1	1	0	0	0	0	0	0	1	2	35
0	673	1	0	0	29	20100917	0	1	0	1	0	1	0	0	0.4	0	1	0	0	1	0	1	0	0	0	0	0	0	0
0	674	1	0	0	30	20100211	1	1	0	0	0	2	0	0	0.4	0	0	1	1	1	1	1	0	0	0	3	0	0	0
0	675	1	0	0	30	20101207	0	1	0	0	0	1	0	0	0.4	0	1	0	0	1	0	0	0	0	0	0	0	0	0
0	676	1	0	0	31	20100212	0	1	0	1	1	0	0	0	0.4	0	1	0	0	0	0	1	0	0	0	4	0	0	0
0	677	1	0	0	31	20100406	1	1	0	0	0	2	0	0	0.4	0	1	0	0	1	1	0	1	0	0	7	0	0	0
0	678	1	0	0	31	20100609	0	1	0	1	0	1	0	0	0.4	0	1	0	0	1	0	1	1	0	0	5	0	0	0
0	679	0	1	0	31	20101011	0	1	0	0	1	0	0	0	0.4	0	1	0	0	0	0	0	0	0	0	4	0	0	0
0	680	1	0	0	32	20100217	1	1	0	1	1	0	0	0	0.4	0	1	0	0	1	0	0	1	1	1	10	0	0	0
0	681	1	0	0	32	20100614	1	1	0	0	0	1	0	0	0.4	0	1	0	0	1	0	0	0	0	0	0	0	0	0
0	682	0	1	0	33	20100303	0	1	0	1	0	1	0	0	0.4	0	1	0	0	1	0	0	0	0	0	0	0	0	0
0	683	1	0	0	33	20100305	0	1	0	1	1	0	0	0	0.4	0	1	0	0	0	0	1	0	1	2	6	0	0	0
0	684	1	0	0	33	20100507	0	1	0	0	0	1	0	0	0.4	0	1	0	0	1	0	0	0	0	0	1	0	0	0
0	685	1	0	0	33	20100825	0	1	0	1	1	0	0	0	0.4	0	1	0	0	1	1	0	0	0	0	1	0	0	0
0	686	0	1	0	33	20100907	0	1	0	1	0	1	0	0	0.4	0	1	0	0	0	0	0	0	1	1	10	0	0	0
0	687	1	0	0	33	20101110	1	1	0	1	1	0	0	0	0.4	0	1	0	0	1	0	0	1	0	0	0	0	0	0
0	688	1	0	0	33	20101230	0	1	0	0	1	0	0	0	0.4	0	1	0	0	1	0	0	0	0	0	0	0	0	0
0	689	1	0	0	34	20100305	0	1	0	1	0	2	0	0	0.4	0	0	1	1	0	0	1	1	0	0	2	0	0	0
0	690	1	0	0	34	20100614	0	1	0	0	0	1	0	0	0.4	0	1	0	0	1	0	0	0	0	0	5	0	0	0
0	691	1	0	0	34	20100715	1	1	0	0	0	1	0	0	0.4	1	0	1	2	1	0	1	0	0	0	5	0	0	0
1	692	0	1	0	34	20100729	1	1	1	0	1	0	0	0	0.4	0	1	0	0	0	1	1	0	1	4	10	1	2	43
0	693	1	0	0	35	20100212	0	1	0	1	0	1	0	1	0.4	0	1	0	0	0	0	0	0	0	0	1	0	0	0
0	694	1	0	0	35	20100303	1	1	0	1	1	0	0	0	0.4	0	0	1	1	1	0	1	0	1	1	3	0	0	0
0	695	0	1	0	35	20100304	0	1	0	1	0	1	0	0	0.4	0	1	0	0	1	0	0	0	0	0	4	0	0	0
0	696	1	0	0	35	20100617	0	1	0	1	0	1	0	0	0.4	0	0	1	1	1	0	0	0	0	0	0	0	0	0
0	697	1	0	0	35	20100727	1	1	0	1	0	1	0	0	0.4	1	0	1	2	1	0	1	0	1	1	1	0	0	0
0	698	1	0	0	35	20101028	0	1	0	1	0	1	0	0	0.4	0	1	0	0	1	1	0	0	0	0	0	0	0	0
0	699	0	1	0	36	20100201	1	1	0	1	1	0	0	0	0.4	0	1	0	0	1	0	0	0	0	0	0	0	0	0
0	700	0	1	0	36	20100305	0	1	0	0	0	1	0	0	0.4	0	1	0	0	1	0	1	0	0	0	3	0	0	0
0	701	1	0	0	36	20100429	1	1	0	1	0	2	0	0	0.4	0	1	0	0	1	1	0	0	0	0	3	0	0	0
0	702	1	0	0	36	20101004	0	1	0	0	1	0	0	0	0.4	0	1	0	0	0	0	0	0	0	0	2	0	0	0
0	703	1	0	0	36	20101028	0	1	0	0	1	0	0	0	0.4	0	1	0	0	1	0	0	0	0	0	2	0	0	0
0	704	0	1	0	36	20101111	0	1	0	0	0	1	0	0	0.4	0	1	0	0	1	0	0	0	0	0	2	0	0	0
0	705	1	0	0	36	20101125	0	1	0	1	0	1	0	0	0.4	0	1	0	0	1	1	0	0	1	1	13	0	0	0
0	706	1	0	0	36	20101207	1	1	0	1	1	0	0	0	0.4	0	1	0	0	1	1	0	0	1	1	2	0	0	0
0	707	1	0	0	37	20100104	1	1	0	1	0	2	0	0	0.4	0	1	0	0	1	0	0	1	0	0	3	0	0	0
0	708	1	0	0	37	20100107	0	1	0	0	0	1	0	0	0.4	0	0	1	1	1	0	1	0	1	1	6	0	0	0
1	709	1	0	0	37	20100524	1	1	1	0	1	0	0	2	0.4	0	1	0	0	1	1	1	0	1	4	6	1	1	32
0	710	1	0	0	37	20101018	0	1	0	0	0	1	0	0	0.4	0	1	0	0	1	1	0	0	0	0	0	0	0	0
0	711	1	0	0	37	20101022	1	1	0	1	1	0	0	0	0.4	0	1	0	0	1	0	1	1	0	0	9	0	0	0
0	712	1	0	0	37	20101101	0	1	0	1	0	1	0	0	0.4	0	1	0	0	1	1	0	0	1	1	3	0	0	0
0	713	1	0	0	37	20101110	0	1	0	1	1	0	0	0	0.4	0	1	0	0	1	0	1	0	1	1	1	0	0	0
0	714	1	0	0	38	20100114	0	1	0	1	1	0	0	0	0.4	0	1	0	0	1	1	0	0	0	0	2	0	0	0
0	715	0	1	0	38	20100519	1	1	0	1	0	1	0	0	0.4	0	1	0	0	1	0	0	1	0	0	10	0	0	0
0	716	1	0	0	38	20100527	1	1	0	1	0	2	0	0	0.4	0	1	0	0	1	0	1	1	0	0	1	0	0	0
0	717	1	0	0	38	20100924	0	1	0	0	1	0	0	0	0.4	0	1	0	0	1	0	0	0	0	0	0	0	0	0
0	718	0	1	0	38	20101022	0	1	0	0	0	1	0	0	0.4	0	1	0	0	0	0	0	0	0	0	14	0	0	0
0	719	1	0	0	38	20101027	1	1	0	1	0	2	0	0	0.4	0	1	0	0	1	0	0	0	1	2	7	0	0	0
0	720	1	0	0	38	20101101	1	1	0	0	0	2	0	0	0.4	0	1	0	0	0	0	0	0	0	0	4	0	0	0
0	721	1	0	0	38	20101125	0	1	0	1	0	1	0	0	0.4	0	1	0	0	1	0	0	0	0	0	1	0	0	0
0	722	1	0	0	39	20100326	0	1	0	0	0	2	0	0	0.4	0	1	0	0	1	0	1	0	0	0	4	0	0	0
0	723	1	0	0	39	20100330	0	1	0	0	0	1	0	0	0.4	0	1	0	0	0	0	1	0	0	0	1	0	0	0
0	724	1	0	0	39	20100429	1	1	0	1	0	1	0	0	0.4	0	1	0	0	1	1	0	0	1	1	5	0	0	0
0	725	1	0	0	39	20100614	1	1	0	1	0	2	0	0	0.4	0	1	0	0	1	1	0	0	0	0	9	0	0	0
0	726	1	0	0	39	20100730	0	1	0	1	0	1	0	0	0.4	0	1	0	0	0	0	0	1	0	0	8	0	0	0
0	727	1	0	0	39	20100902	0	1	0	1	0	1	0	0	0.4	0	1	0	0	1	1	0	0	0	0	0	0	0	0
0	728	1	0	0	39	20100913	0	1	0	1	0	1	0	0	0.4	0	1	0	0	1	0	0	1	0	0	8	0	0	0
0	729	1	0	0	39	20101111	1	1	0	0	0	1	0	0	0.4	0	1	0	0	1	0	1	1	1	5	7	0	0	0
0	730	1	0	0	39	20101214	1	1	0	0	1	0	0	0	0.4	0	1	0	0	1	0	0	0	0	0	5	0	0	0
0	731	1	0	0	39	20101230	1	1	0	1	0	1	0	0	0.4	0	1	0	0	1	0	0	1	0	0	14	0	0	0
0	732	1	0	0	40	20100106	0	1	0	1	1	0	0	0	0.4	0	1	0	0	1	1	1	0	0	0	1	0	0	0
0	733	1	0	0	40	20100225	0	1	0	0	1	0	0	0	0.4	0	1	0	0	0	0	0	0	0	0	5	0	0	0
0	734	1	0	0	40	20100311	1	1	0	1	0	2	0	0	0.4	0	1	0	0	1	1	1	0	1	1	1	0	0	0
0	735	1	0	0	40	20100721	1	1	0	1	1	0	0	0	0.4	0	0	1	1	1	0	1	0	0	0	6	0	0	0
0	736	1	0	0	40	20100802	0	1	0	1	0	1	0	0	0.4	0	1	0	0	1	0	1	1	0	0	4	0	0	0
0	737	1	0	0	40	20100813	1	1	0	0	0	1	0	0	0.4	0	0	1	1	1	0	0	0	1	1	2	0	0	0
1	738	1	0	0	40	20101027	1	1	1	0	1	0	0	1	0.4	1	0	1	2	0	0	1	1	0	0	10	1	1	28
0	739	0	1	0	40	20101231	1	1	0	0	0	2	0	0	0.4	0	1	0	0	1	1	0	0	0	0	4	0	0	0
0	740	1	0	0	41	20100114	0	1	0	0	0	1	0	0	0.4	0	0	1	1	1	0	0	1	1	1	5	0	0	0
0	741	0	1	0	41	20100208	1	1	0	0	1	0	0	0	0.4	0	1	0	0	1	0	1	1	0	0	7	0	0	0
0	742	1	0	0	41	20100716	0	1	0	1	0	1	0	1	0.4	0	1	0	0	0	0	0	0	0	0	11	0	0	0
0	743	1	0	0	41	20101227	0	1	0	0	0	2	0	0	0.4	0	1	0	0	1	1	1	1	0	0	5	0	0	0
0	744	1	0	0	42	20100122	1	1	0	1	0	1	0	0	0.4	0	1	0	0	1	0	0	1	0	0	17	0	0	0
0	745	1	0	0	42	20100312	1	1	0	1	0	2	0	0	0.4	0	1	0	0	0	0	0	0	0	0	0	0	0	0
0	746	0	1	0	42	20100504	0	1	0	0	0	2	0	0	0.4	0	1	0	0	1	0	0	0	0	0	0	0	0	0
0	747	1	0	0	42	20100526	0	1	0	0	0	2	0	0	0.4	0	1	0	0	1	0	0	1	0	0	0	0	0	0
0	748	1	0	0	43	20100401	0	1	0	0	1	0	0	0	0.4	0	1	0	0	1	0	0	1	0	0	0	0	0	0
0	749	1	0	0	43	20100728	1	1	0	1	0	1	0	0	0.4	0	1	0	0	1	0	0	0	0	0	1	0	0	0
0	750	1	0	0	43	20101019	1	1	0	0	0	1	0	0	0.4	0	0	1	1	1	1	1	1	0	0	2	0	0	0
0	751	1	0	0	43	20101112	1	1	0	0	0	2	0	0	0.4	1	0	1	2	1	1	0	0	0	0	12	0	0	0
0	752	1	0	0	43	20101217	0	0	0	1	0	2	0	0	0.4	0	1	0	0	1	0	0	0	1	1	3	0	0	0
0	753	1	0	0	44	20100111	1	1	0	0	0	1	0	1	0.4	0	1	0	0	1	0	0	0	0	0	2	0	0	0
1	754	1	0	0	44	20100416	1	1	1	1	1	0	0	0	0.4	0	0	1	1	1	0	1	0	0	0	0	1	1	12
0	755	1	0	0	44	20101230	0	1	0	2	0	1	0	0	0.4	0	1	0	0	1	0	0	0	0	0	6	0	0	0
0	756	1	0	0	45	20100118	0	1	0	0	0	1	0	0	0.4	0	1	0	0	1	0	0	0	0	0	3	0	0	0
0	757	1	0	0	45	20100203	0	1	0	0	0	1	0	0	0.4	0	1	0	0	1	1	0	1	1	1	12	0	0	0
0	758	1	0	0	45	20100218	0	1	0	0	1	0	0	0	0.4	0	0	1	1	1	0	1	0	0	0	0	0	0	0
0	759	1	0	0	45	20100420	1	1	0	0	1	0	0	0	0.4	0	1	0	0	1	0	1	1	0	0	5	0	0	0
0	760	1	0	0	45	20100707	0	1	0	1	1	0	0	0	0.4	0	1	0	0	1	0	0	1	0	0	4	0	0	0
0	761	1	0	0	45	20100818	1	1	0	0	0	1	0	0	0.4	0	0	1	1	1	1	1	0	1	1	4	0	0	0
0	762	1	0	0	45	20101118	1	1	0	1	0	2	0	0	0.4	0	1	0	0	1	0	0	0	0	0	10	0	0	0
0	763	0	1	0	46	20100319	0	1	0	0	0	1	0	0	0.4	0	1	0	0	1	0	0	0	0	0	5	0	0	0
0	764	1	0	0	46	20100916	1	1	0	1	0	1	0	0	0.4	0	1	0	0	1	1	0	0	0	0	7	0	0	0
0	765	0	1	0	47	20100113	1	1	0	0	1	0	0	0	0.4	0	1	1	1	1	0	1	0	1	1	3	0	0	0
0	766	1	0	0	47	20100128	1	1	0	1	0	2	0	0	0.4	0	1	0	0	1	1	1	0	0	0	8	0	0	0
0	767	1	0	0	47	20100330	0	1	0	1	0	1	0	0	0.4	0	1	0	0	0	0	0	0	0	0	3	0	0	0
0	768	1	0	0	47	20100401	1	1	0	0	0	1	0	0	0.4	0	0	1	1	1	0	0	0	0	0	3	0	0	0
0	769	1	0	0	47	20100526	0	1	0	1	0	2	0	0	0.4	0	1	0	0	1	1	0	0	0	0	5	0	0	0
0	770	1	0	0	48	20100617	0	1	0	0	0	1	0	0	0.4	0	1	0	0	1	0	0	0	0	0	0	0	0	0
0	771	1	0	0	48	20100624	1	1	0	1	0	1	0	0	0.4	0	1	0	0	1	0	0	0	0	0	1	0	0	0
0	772	1	0	0	48	20101217	0	1	0	0	0	2	0	0	0.4	0	1	0	0	1	0	0	1	0	0	7	0	0	0
0	773	1	0	0	49	20100519	1	1	0	0	0	1	0	0	0.4	0	1	0	0	1	0	0	1	0	0	8	0	0	5
0	774	1	0	0	49	20100528	1	1	0	0	0	1	0	0	0.4	0	1	0	0	0	0	0	0	0	0	3	0	0	0
0	775	0	1	0	49	20100721	1	1	0	0	1	0	0	0	0.4	0	1	0	0	1	0	0	1	0	0	7	0	0	0
0	776	0	1	0	49	20100826	0	1	0	1	1	0	0	0	0.4	0	1	0	0	0	0	0	1	0	0	6	0	0	0
0	777	1	0	0	50	20100603	1	1	0	1	0	1	0	0	0.4	0	1	0	0	0	1	0	0	0	0	2	0	0	0
0	778	1	0	0	50	20100721	0	1	0	1	1	0	0	0	0.4	0	1	0	0	1	1	0	1	0	0	0	0	0	0
0	779	1	0	0	50	20100730	0	1	0	1	0	1	0	0	0.4	0	0	1	1	0	0	0	0	0	0	0	0	0	0
0	780	0	1	0	50	20101117	0	1	0	0	0	1	0	0	0.4	0	1	0	0	0	0	1	0	0	0	2	0	0	0
0	781	1	0	0	50	20101123	1	1	0	0	1	0	0	0	0.4	0	1	0	0	0	0	1	0	1	1	3	0	0	0
0	782	1	0	0	51	20100804	0	1	0	1	0	2	0	0	0.4	0	1	0	0	0	1	0	1	0	0	3	0	0	0
0	783	1	0	0	51	20101103	0	1	0	0	0	1	0	0	0.4	0	1	0	0	0	0	0	1	0	0	2	0	0	0
0	784	1	0	0	51	20101123	1	1	0	1	1	0	0	0	0.4	0	1	0	0	1	1	0	0	0	0	2	0	0	0
0	785	1	0	0	52	20100111	1	1	0	0	1	0	0	0	0.4	0	1	0	0	1	0	0	0	0	0	4	0	0	0
0	786	1	0	0	52	20100318	1	1	0	0	1	0	0	0	0.4	0	0	1	1	0	0	0	0	0	0	1	0	0	0
0	787	0	1	0	52	20100504	0	1	0	1	0	1	0	0	0.4	0	1	0	0	1	0	0	0	0	0	1	0	0	0
0	788	1	0	0	52	20100610	1	1	0	2	0	1	0	0	0.4	0	1	0	0	1	1	1	0	0	0	5	0	0	0
0	789	1	0	0	52	20100927	0	1	0	1	1	0	0	0	0.4	0	1	0	0	1	0	1	1	0	0	4	0	0	0
0	790	0	1	0	52	20101026	1	1	0	0	0	2	0	0	0.4	0	1	0	0	1	1	0	1	0	0	12	0	0	0
0	791	0	1	0	53	20100129	1	1	0	0	1	0	0	0	0.4	0	1	0	0	0	0	1	0	0	0	2	0	0	0
0	792	0	1	0	53	20100610	1	1	0	0	0	1	0	1	0.4	0	1	0	0	1	0	0	0	0	0	5	0	0	0
0	793	1	0	0	53	20100831	0	1	0	0	1	0	0	0	0.4	0	1	0	0	1	1	0	0	0	0	2	0	0	0
0	794	1	0	0	53	20101102	1	1	0	0	0	1	0	0	0.4	0	1	0	0	1	1	0	1	1	2	3	0	0	0
0	795	1	0	0	53	20101103	1	1	0	1	1	0	0	0	0.4	0	0	1	1	1	0	0	0	0	0	7	0	0	0
0	796	1	0	0	54	20100126	1	1	0	0	0	1	0	0	0.4	0	1	0	0	1	0	1	0	0	0	6	0	0	0
0	797	1	0	0	54	20100210	0	1	0	1	0	1	0	1	0.4	0	0	1	1	1	1	0	0	0	0	2	0	0	0
0	798	1	0	0	54	20100317	1	1	0	1	0	2	0	0	0.4	0	1	0	0	1	1	1	0	1	3	5	0	0	0
0	799	1	0	0	54	20100405	1	1	0	1	0	1	0	0	0.4	0	0	1	1	1	1	0	1	0	0	5	0	0	0
0	800	1	0	0	54	20100407	0	1	0	0	0	2	0	0	0.4	0	1	0	0	1	1	0	0	0	0	0	0	0	0
0	801	1	0	0	54	20100506	1	1	0	1	0	2	0	0	0.4	0	1	0	0	1	0	0	1	0	0	3	0	0	0
0	802	1	0	0	54	20100623	0	1	0	0	0	1	0	0	0.4	0	0	1	1	1	0	0	0	0	0	5	0	0	0
0	803	1	0	1	55	20100112	0	1	0	0	0	2	0	0	0.4	0	1	0	0	1	0	0	1	0	0	16	0	0	0
0	804	0	1	1	55	20101102	0	1	0	1	1	0	0	0	0.4	0	1	0	0	0	0	0	0	0	0	2	0	0	0
0	805	1	0	1	56	20100106	1	1	0	0	0	1	0	0	0.4	0	1	0	0	1	0	0	0	0	0	1	0	0	0
0	806	1	0	1	56	20100402	1	1	0	0	0	1	0	0	0.4	0	1	0	0	1	0	0	0	0	0	0	0	0	0
0	807	1	0	1	56	20100604	1	1	0	1	0	1	0	0	0.4	0	0	1	1	1	0	0	0	0	0	1	0	0	0
0	808	1	0	1	56	20100716	0	1	0	1	0	2	0	0	0.4	0	1	0	0	1	0	1	0	1	1	4	0	0	0
0	809	1	0	1	56	20100824	0	1	0	1	0	1	0	0	0.4	0	1	0	0	0	0	0	1	0	0	6	0	0	0
0	810	1	0	1	56	20101007	1	1	0	0	0	1	0	0	0.4	0	1	0	0	1	0	0	0	0	0	8	0	0	0
0	811	1	0	1	56	20101101	0	1	0	1	0	1	0	0	0.4	0	1	0	0	1	1	0	0	1	1	3	0	0	0
0	812	1	0	1	57	20100104	0	1	0	1	0	1	0	0	0.4	0	1	0	0	1	0	0	0	0	0	1	0	0	0
0	813	0	1	1	57	20101019	1	1	0	0	0	1	0	0	0.4	0	1	0	0	1	0	1	0	0	0	2	0	0	0
0	814	1	0	1	58	20100305	1	1	0	0	0	2	0	0	0.4	0	1	0	0	1	0	0	0	0	0	10	0	0	0
0	815	1	0	1	58	20100317	1	1	0	0	1	0	0	0	0.4	0	1	0	0	1	0	0	1	0	0	7	0	0	0
0	816	1	0	1	58	20100504	1	1	0	0	1	0	0	0	0.4	0	1	0	0	1	0	0	0	0	0	1	0	0	0
0	817	1	0	1	59	20100707	0	1	0	0	0	1	0	0	0.4	0	1	0	0	1	0	0	0	0	0	3	0	0	0
0	818	1	0	1	59	20101103	1	1	0	1	0	1	0	0	0.4	0	1	0	0	0	0	0	0	0	0	2	0	0	0
0	819	1	0	1	60	20101005	1	1	0	0	0	1	0	1	0.4	0	0	1	1	0	0	0	0	0	0	4	0	0	0
0	820	1	0	1	61	20100809	1	1	0	0	0	1	0	0	0.4	0	1	0	0	0	1	0	1	0	0	0	0	0	0
0	821	0	1	1	61	20101101	0	1	0	0	0	2	0	0	0.4	0	1	0	0	1	1	0	0	0	0	1	0	0	0
0	822	1	0	1	62	20100713	0	1	0	0	0	1	0	0	0.4	0	1	0	0	1	0	1	1	0	0	9	0	0	0
0	823	1	0	1	63	20100127	1	1	0	0	0	1	0	0	0.4	0	1	0	0	1	0	0	0	0	0	1	0	0	0
0	824	1	0	1	63	20100608	1	1	0	1	0	2	0	0	0.4	1	0	1	2	1	1	0	0	1	9	9	0	0	0
0	825	0	1	1	63	20100719	0	1	0	0	1	0	0	0	0.4	0	1	0	0	1	1	0	0	0	0	0	0	0	0
0	826	0	1	1	64	20100218	1	1	0	1	0	2	0	0	0.4	0	1	0	0	0	0	1	0	0	0	3	0	0	0
0	827	1	0	1	65	20100311	1	1	0	0	0	1	0	0	0.4	0	1	0	0	1	1	0	0	0	0	0	0	0	0
0	828	0	1	1	65	20100420	1	1	0	1	0	1	0	0	0.4	0	1	0	0	1	0	0	0	0	0	4	0	0	0
0	829	1	0	1	65	20100506	1	1	0	0	0	1	0	0	0.4	0	1	0	0	1	1	0	0	1	1	3	0	0	0
0	830	1	0	1	66	20101005	1	1	0	1	0	2	0	0	0.4	0	1	0	0	1	0	0	1	0	0	2	0	0	0
0	831	0	1	1	67	20100823	0	1	0	0	0	1	0	0	0.4	0	1	0	0	1	1	0	1	0	0	5	0	0	0
1	832	1	0	1	68	20101013	1	1	1	0	1	0	0	0	0.4	0	1	0	0	0	1	0	0	0	0	2	1	3	15
0	833	1	0	1	69	20100311	1	1	0	1	0	1	0	0	0.4	0	1	0	0	1	0	0	0	0	0	14	0	0	0
0	834	1	0	1	69	20100412	1	1	0	1	0	1	0	0	0.4	0	1	0	0	1	0	0	0	0	0	3	0	0	0
0	835	1	0	1	70	20100401	0	1	0	0	0	2	0	0	0.4	0	1	0	0	1	0	0	0	0	0	9	0	0	0
0	836	1	0	1	71	20100119	1	1	0	1	0	2	0	0	0.4	0	1	0	0	0	0	0	0	0	0	2	0	0	0
0	837	1	0	1	73	20100806	1	1	0	0	1	0	0	0	0.4	0	1	0	0	1	1	1	0	0	0	2	0	0	0
0	838	1	0	0	13	20100719	0	1	0	0	0	1	0	0	0.5	0	1	0	0	1	0	1	1	1	2	3	0	0	0
0	839	1	0	0	17	20100108	0	1	0	0	0	1	0	0	0.5	0	1	0	0	1	0	1	1	1	1	9	0	0	0
0	840	0	1	0	22	20100816	0	1	0	2	0	1	0	0	0.5	0	1	0	0	1	1	1	0	0	0	0	0	0	0
0	841	1	0	0	23	20101027	0	1	0	1	0	1	0	0	0.5	0	1	0	0	1	0	1	0	0	0	2	0	0	0
0	842	1	0	0	25	20100209	1	1	0	0	0	2	0	0	0.5	0	0	1	1	1	1	0	1	1	1	19	0	0	0
0	843	1	0	0	25	20100907	1	1	0	0	1	0	0	1	0.5	1	0	1	2	1	0	0	0	1	1	3	0	0	2
0	844	0	1	0	26	20100325	0	1	0	0	0	1	0	0	0.5	0	1	0	0	0	0	0	0	0	0	0	0	0	0
0	845	1	0	0	26	20100729	0	1	0	1	0	1	0	0	0.5	0	1	0	0	1	0	0	0	0	0	0	0	0	0
0	846	1	0	0	26	20100924	1	1	0	0	0	1	0	0	0.5	0	0	1	1	1	1	1	0	0	0	1	0	0	0
0	847	1	0	0	26	20101011	1	1	0	1	0	1	0	0	0.5	0	1	0	0	0	1	1	0	1	2	4	0	0	0
0	848	1	0	0	27	20100429	1	1	0	1	0	1	0	0	0.5	0	1	0	0	1	0	1	0	1	1	2	0	0	0
0	849	0	1	0	27	20100709	0	1	0	1	1	0	0	0	0.5	0	1	0	0	0	0	0	0	0	0	2	0	0	0
0	850	0	1	0	27	20100806	1	1	0	1	1	0	0	0	0.5	0	1	0	0	1	0	1	0	1	3	7	0	0	0
0	851	0	1	0	28	20100125	0	1	0	0	0	1	0	0	0.5	0	1	0	0	1	1	0	1	0	0	8	0	0	0
0	852	1	0	0	28	20100806	0	1	0	1	1	0	0	0	0.5	0	1	0	0	1	1	0	1	0	0	5	0	0	0
0	853	1	0	0	28	20100817	0	1	0	1	0	1	0	0	0.5	0	1	0	0	0	1	1	0	0	0	0	0	0	0
1	854	1	0	0	29	20100824	1	1	2	0	0	1	0	2	0.5	0	1	0	0	1	1	1	1	1	9	9	1	11	57
0	855	0	1	0	29	20100824	1	1	0	1	1	0	0	0	0.5	0	1	1	1	0	1	1	1	1	2	2	0	0	0
0	856	0	1	0	29	20101202	0	1	0	0	1	0	0	0	0.5	0	1	0	0	0	0	0	1	0	0	1	0	0	0
0	857	1	0	0	30	20100105	1	1	0	1	0	2	0	0	0.5	0	1	0	0	1	0	0	1	0	0	10	0	0	0
0	858	1	0	0	30	20100816	1	1	0	0	1	0	0	0	0.5	1	0	1	2	1	0	0	1	0	0	2	0	0	0
0	859	1	0	0	30	20100823	0	1	0	0	0	1	0	0	0.5	0	1	0	0	0	0	0	0	0	0	8	0	0	0
1	860	0	1	0	30	20100906	1	1	1	0	0	1	0	0	0.5	1	1	1	2	1	1	1	0	1	7	9	1	4	61
0	861	1	0	0	30	20100920	0	1	0	0	1	0	0	0	0.5	0	1	0	0	1	0	0	0	1	1	3	0	0	0
0	862	1	0	0	30	20101230	0	1	0	0	0	2	0	0	0.5	0	1	0	0	1	0	0	1	0	0	2	0	0	0
0	863	0	1	0	31	20100805	1	1	0	0	1	0	0	0	0.5	0	1	0	0	1	1	1	0	0	0	3	0	0	0
0	864	1	0	0	31	20100816	0	1	0	0	0	1	0	0	0.5	0	1	0	0	1	0	0	1	1	2	6	0	0	0
0	865	1	0	0	31	20100816	0	1	0	0	1	0	0	0	0.5	0	1	0	0	0	0	0	1	0	0	4	0	0	0
0	866	1	0	0	32	20100204	1	1	0	0	0	1	0	0	0.5	0	1	0	0	1	1	0	1	0	0	0	0	0	0
0	867	1	0	0	32	20100309	0	1	0	1	0	2	0	0	0.5	0	1	0	0	1	0	0	1	0	0	3	0	0	0
0	868	1	0	0	32	20100407	0	1	0	1	0	1	0	0	0.5	0	1	0	0	1	1	0	0	0	0	2	0	0	0
0	869	1	0	0	32	20100415	1	1	0	1	1	0	0	0	0.5	0	1	0	0	1	1	0	1	0	0	3	0	0	0
0	870	1	0	0	33	20100504	1	1	0	1	0	1	0	0	0.5	0	1	0	0	1	0	0	0	0	0	1	0	0	0
0	871	1	0	0	33	20100721	1	1	0	1	0	2	0	2	0.5	1	0	1	2	1	0	1	1	1	2	4	0	0	0
0	872	1	0	0	33	20100722	0	1	0	1	0	2	0	0	0.5	0	0	1	1	1	0	1	0	0	0	1	0	0	0
0	873	0	1	0	33	20100818	0	1	0	1	1	0	0	0	0.5	0	1	0	0	0	1	1	0	1	2	2	0	0	0
0	874	1	0	0	33	20100913	1	1	0	1	0	1	0	0	0.5	0	1	0	0	0	0	1	0	1	2	3	0	0	0
0	875	1	0	0	34	20100818	0	1	0	0	0	1	0	0	0.5	0	1	0	0	0	0	1	0	1	1	1	0	0	0
0	876	1	0	0	34	20100902	0	1	0	0	1	0	0	0	0.5	0	1	0	0	0	0	0	0	0	0	2	0	0	0
0	877	1	0	0	34	20100930	0	1	0	1	1	0	0	0	0.5	0	1	0	0	1	0	1	1	0	0	0	0	0	0
0	878	1	0	0	34	20101005	1	1	0	1	0	1	0	0	0.5	0	1	0	0	0	0	0	0	0	0	2	0	0	5
0	879	1	0	0	34	20101111	0	1	0	0	1	0	0	0	0.5	0	1	0	0	1	1	1	0	1	1	3	0	0	0
0	880	0	1	0	34	20101224	0	1	0	1	0	1	0	0	0.5	0	1	0	0	1	0	1	0	0	0	3	0	0	0
0	881	1	0	0	35	20100120	1	1	0	1	0	2	0	1	0.5	0	1	0	0	0	1	1	1	1	2	3	0	0	0
1	882	1	0	0	35	20100212	1	1	1	0	1	0	0	0	0.5	0	1	0	0	1	1	0	1	0	0	5	1	1	24
0	883	1	0	0	35	20100318	1	1	0	0	0	2	0	0	0.5	0	1	0	0	1	1	1	0	0	0	0	0	0	0
0	884	1	0	0	35	20100506	0	1	0	1	0	1	0	0	0.5	0	1	0	0	1	0	0	1	0	0	11	0	0	0
0	885	1	0	0	35	20100507	1	1	0	1	0	1	0	0	0.5	0	0	1	1	1	1	0	0	1	2	2	0	0	0
0	886	1	0	0	35	20100628	0	1	0	1	0	1	0	0	0.5	0	0	1	1	1	0	1	0	0	0	4	0	0	0
0	887	1	0	0	35	20100827	0	1	0	0	0	1	0	0	0.5	0	1	0	0	1	1	1	1	0	0	2	0	0	0
0	888	1	0	0	35	20100920	0	1	0	1	0	1	0	0	0.5	0	1	0	0	0	0	0	0	0	0	2	0	0	0
0	889	1	0	0	35	20101008	0	1	0	1	0	1	0	0	0.5	0	1	0	0	1	0	0	0	1	1	5	0	0	0
0	890	1	0	0	36	20100119	1	1	0	0	0	1	0	0	0.5	0	0	1	1	1	1	0	0	0	0	4	0	0	0
0	891	0	1	0	36	20100326	0	1	0	0	0	1	0	0	0.5	0	1	0	0	0	0	0	0	0	0	2	0	0	0
0	892	1	0	0	36	20100924	0	1	0	0	1	0	0	0	0.5	0	1	0	0	1	0	1	1	0	0	10	0	0	0
0	893	1	0	0	36	20100927	0	1	0	1	1	0	0	0	0.5	0	1	0	0	1	0	0	0	0	0	1	0	0	0
0	894	1	0	0	36	20100929	1	1	0	1	0	1	0	0	0.5	0	1	0	0	0	0	1	1	0	0	6	0	0	0
0	895	0	1	0	36	20101110	0	1	0	0	0	1	0	0	0.5	0	1	0	0	1	0	0	0	1	3	5	0	0	0
0	896	1	0	0	37	20100126	1	1	0	1	1	0	0	0	0.5	0	1	0	0	1	1	0	1	0	0	7	0	0	0
0	897	1	0	0	37	20100318	0	1	0	0	0	2	0	0	0.5	0	1	0	0	1	0	0	0	0	0	1	0	0	0
0	898	1	0	0	37	20100331	1	1	0	0	1	0	0	0	0.5	0	0	1	1	1	1	1	1	0	0	11	0	0	0
0	899	1	0	0	37	20100714	0	1	0	1	0	1	0	0	0.5	0	0	1	1	1	0	0	0	1	1	6	0	0	0
0	900	1	0	0	37	20100812	0	1	0	1	0	1	0	0	0.5	0	1	0	0	1	0	1	0	1	3	7	0	0	0
0	901	0	1	0	37	20100826	1	1	0	0	0	1	0	0	0.5	0	1	0	0	1	1	0	0	0	0	2	0	0	0
0	902	0	1	0	37	20100917	1	1	0	0	0	1	0	0	0.5	0	1	0	0	1	0	1	0	1	1	1	0	0	0
0	903	1	0	0	37	20100920	0	1	0	0	0	1	0	0	0.5	0	0	1	1	1	1	0	0	0	0	1	0	0	0
0	904	0	1	0	37	20101111	0	1	0	1	1	0	0	0	0.5	0	1	0	0	0	0	0	0	0	0	7	0	0	0
0	905	1	0	0	37	20101118	0	1	0	0	1	0	0	0	0.5	0	1	0	0	1	0	1	0	0	0	0	0	0	0
0	906	1	0	0	38	20100113	1	1	0	1	0	1	0	0	0.5	0	1	0	0	1	0	1	0	0	0	0	0	0	0
0	907	1	0	0	38	20100114	0	1	0	1	0	1	0	0	0.5	0	1	0	0	1	1	0	0	0	0	0	0	0	0
0	908	1	0	0	38	20100412	1	1	0	1	0	2	0	0	0.5	0	1	0	0	0	0	0	0	1	2	2	0	0	0
0	909	1	0	0	38	20100420	1	1	0	0	0	2	0	0	0.5	0	1	0	0	1	1	0	1	0	0	5	0	0	0
0	910	1	0	0	38	20100610	1	1	0	0	0	1	0	0	0.5	0	1	0	0	1	0	1	0	1	1	1	0	0	0
0	911	1	0	0	38	20100622	1	1	0	1	0	1	0	0	0.5	0	0	1	1	1	0	1	1	1	2	7	0	0	0
0	912	0	1	0	38	20100827	1	1	0	1	0	1	0	0	0.5	0	1	0	0	1	1	1	0	1	3	6	0	0	0
0	913	1	0	0	38	20100930	0	1	0	0	0	1	0	0	0.5	0	1	0	0	0	0	0	0	0	0	0	0	0	0
0	914	0	1	0	38	20101102	1	1	0	1	0	2	0	0	0.5	0	1	0	0	0	0	1	0	1	3	5	0	0	0
0	915	1	0	0	39	20100218	1	1	0	0	0	1	0	0	0.5	0	1	0	0	1	0	0	1	0	0	5	0	0	0
0	916	1	0	0	39	20100222	1	1	0	1	0	1	0	0	0.5	0	1	0	0	1	1	1	0	1	4	6	0	0	0
1	917	1	0	0	39	20100722	1	1	1	1	0	1	0	0	0.5	0	1	0	0	1	0	0	0	1	6	6	1	1	10
0	918	0	1	0	39	20100803	1	1	0	1	0	2	0	0	0.5	0	1	0	0	0	0	1	0	1	1	2	0	0	0
0	919	1	0	0	39	20100813	1	1	0	0	0	2	0	0	0.5	1	0	1	2	1	0	1	0	1	3	7	0	0	0
0	920	0	1	0	39	20101111	1	1	0	0	1	0	0	0	0.5	0	1	0	0	1	1	0	1	0	0	0	0	0	0
0	921	0	1	0	40	20100112	1	1	0	0	0	2	0	0	0.5	0	1	0	0	1	1	0	0	1	2	9	0	0	0
1	922	1	0	0	40	20100127	1	1	1	1	0	1	0	0	0.5	0	1	0	0	1	1	1	1	0	0	5	1	5	55
0	923	1	0	0	40	20100128	0	1	0	0	1	0	0	0	0.5	0	0	1	1	0	0	0	0	0	0	2	0	0	0
0	924	1	0	0	40	20100128	0	1	0	0	0	2	0	0	0.5	0	1	0	0	1	0	0	0	0	0	0	0	0	0
0	925	1	0	0	40	20100223	1	1	0	1	0	2	0	0	0.5	0	0	1	1	1	1	1	0	0	0	4	0	0	0
0	926	1	0	0	40	20100325	1	1	0	0	0	1	0	0	0.5	0	0	1	1	1	1	1	0	1	6	6	0	0	0
0	927	1	0	0	40	20100528	0	1	0	0	0	1	0	0	0.5	0	1	0	0	1	1	0	0	0	0	1	0	0	0
0	928	1	0	0	40	20100611	0	1	0	1	1	0	0	0	0.5	0	1	0	0	0	0	0	0	0	0	0	0	0	0
0	929	0	1	0	40	20100831	1	1	0	0	0	1	0	0	0.5	1	1	1	2	0	0	1	0	0	0	8	0	0	0
0	930	1	0	0	40	20100929	1	1	0	0	0	1	0	0	0.5	0	1	0	0	0	1	0	0	0	0	6	0	0	0
0	931	1	0	0	40	20101202	1	1	0	0	1	0	0	0	0.5	0	1	0	0	1	1	0	0	0	0	2	0	0	0
0	932	0	1	0	41	20100211	1	1	0	0	0	1	0	0	0.5	0	1	0	0	1	1	0	1	1	6	9	0	0	0
0	933	0	1	0	41	20100406	0	1	0	0	0	1	0	0	0.5	0	1	0	0	1	0	0	1	0	0	0	0	0	0
0	934	1	0	0	41	20100412	1	1	0	0	1	0	0	0	0.5	0	1	0	0	0	0	0	0	1	1	6	0	0	0
0	935	1	0	0	41	20100531	0	1	0	1	0	1	0	0	0.5	0	1	0	0	1	1	0	0	0	0	1	0	0	0
0	936	1	0	0	41	20100531	1	1	0	1	0	1	0	0	0.5	1	0	1	2	1	1	1	1	0	0	3	0	0	0
0	937	1	0	0	41	20100907	1	1	0	1	0	2	0	0	0.5	0	1	0	0	0	0	1	0	1	2	5	0	0	0
0	938	1	0	0	42	20100312	0	1	0	1	0	1	0	0	0.5	0	1	0	0	1	0	1	0	0	0	0	0	0	0
0	939	1	0	0	42	20100427	1	1	0	0	1	0	0	0	0.5	0	0	1	1	1	0	0	0	1	1	2	0	0	0
0	940	1	0	0	42	20100720	0	1	0	1	0	1	0	0	0.5	0	1	0	0	1	0	0	0	0	0	3	0	0	0
0	941	1	0	0	42	20100802	0	1	0	0	0	2	0	0	0.5	0	0	1	1	0	0	1	0	0	0	1	0	0	0
0	942	0	1	0	42	20100802	0	1	0	0	0	1	0	0	0.5	0	1	0	0	0	0	0	0	1	1	1	0	0	0
1	943	1	0	0	42	20100902	1	1	1	1	1	0	0	2	0.5	0	1	0	0	0	0	1	1	1	6	14	1	1	44
0	944	1	0	0	43	20100127	0	1	0	0	1	0	0	0	0.5	0	0	1	1	1	1	1	0	0	0	2	0	0	0
0	945	0	1	0	43	20100722	1	1	1	0	0	1	0	0	0.5	1	1	1	2	1	1	1	0	1	3	5	0	0	22
0	946	1	0	0	43	20100908	0	1	0	0	0	1	0	0	0.5	0	1	0	0	1	0	1	0	0	0	4	0	0	0
1	947	1	0	0	43	20100917	1	1	0	1	1	0	0	0	0.5	0	1	0	0	1	1	0	0	0	0	5	1	3	4
0	948	0	1	0	43	20101019	1	1	0	0	0	2	0	0	0.5	0	1	0	0	1	1	1	0	1	2	2	0	0	0
0	949	1	0	0	44	20100114	1	1	0	0	0	2	0	0	0.5	0	1	0	0	1	0	0	0	1	2	13	0	0	0
0	950	1	0	0	44	20100210	1	1	0	1	0	2	0	0	0.5	0	1	0	0	1	0	0	1	0	0	7	0	0	0
0	951	0	1	0	44	20100226	1	1	0	1	0	1	0	0	0.5	1	1	1	2	1	1	0	0	0	0	5	0	0	0
0	952	1	0	0	44	20100304	0	1	0	0	0	1	0	0	0.5	0	0	1	1	1	1	0	1	0	0	4	0	0	0
0	953	0	1	0	44	20100317	1	1	0	1	0	1	0	1	0.5	0	1	1	1	1	0	0	1	1	2	4	0	0	0
0	954	0	1	0	44	20100421	1	1	0	0	0	1	0	0	0.5	0	1	0	0	1	1	1	0	0	0	0	0	0	0
0	955	1	0	0	44	20100430	1	1	0	1	0	1	0	0	0.5	0	0	1	1	1	1	0	0	1	1	4	0	0	0
0	956	0	1	0	44	20100506	1	1	0	0	1	0	0	0	0.5	0	1	0	0	1	0	0	0	1	2	3	0	0	0
0	957	1	0	0	44	20100512	1	1	0	1	1	0	0	0	0.5	1	0	1	2	1	1	0	0	0	0	4	0	0	0
0	958	1	0	0	44	20101020	0	1	0	0	1	0	0	0	0.5	0	1	0	0	0	1	0	0	0	0	5	0	0	0
0	959	1	0	0	45	20100312	1	1	0	1	0	1	0	0	0.5	0	1	0	0	1	1	0	1	0	0	5	0	0	0
0	960	1	0	0	45	20100713	1	1	0	0	0	1	0	0	0.5	0	1	0	0	1	0	0	1	0	0	10	0	0	0
0	961	1	0	0	45	20100830	0	1	0	0	0	1	0	0	0.5	0	1	0	0	1	0	1	0	0	0	4	0	0	0
0	962	1	0	0	45	20100920	1	1	0	0	1	0	0	0	0.5	0	1	0	0	0	0	0	0	0	0	1	0	0	0
0	963	1	0	0	45	20100928	1	1	0	1	0	2	0	0	0.5	1	0	1	2	0	0	0	0	0	0	2	0	0	0
0	964	0	1	0	46	20100125	0	1	0	1	0	2	0	0	0.5	0	1	0	0	1	0	0	0	1	1	2	0	0	0
0	965	1	0	0	46	20100201	1	1	0	0	0	1	0	0	0.5	0	0	1	1	1	1	0	0	1	2	3	0	0	0
0	966	1	0	0	46	20100315	1	1	0	0	0	2	0	0	0.5	0	1	0	0	1	1	0	1	0	0	3	0	0	0
0	967	1	0	0	46	20100803	0	1	0	1	0	1	0	0	0.5	0	1	0	0	0	0	0	0	0	0	0	0	0	0
0	968	0	1	0	46	20100803	1	1	0	0	0	2	0	0	0.5	0	1	1	1	0	0	0	0	1	1	1	0	0	0
0	969	0	1	0	47	20100114	1	1	0	0	0	1	0	0	0.5	0	1	0	0	1	0	0	0	0	0	2	0	0	0
0	970	1	0	0	47	20100224	1	1	0	1	1	0	0	0	0.5	0	1	0	0	1	0	0	1	1	2	3	0	0	0
0	971	1	0	0	47	20100319	1	1	0	0	0	2	0	0	0.5	0	1	0	0	1	1	0	1	0	0	12	0	0	0
0	972	1	0	0	47	20100414	0	1	0	0	0	1	0	0	0.5	0	1	0	0	1	0	1	1	0	0	7	0	0	0
0	973	1	0	0	47	20100603	0	1	0	1	0	2	0	0	0.5	0	0	1	1	1	0	0	1	0	0	0	0	0	0
0	974	1	0	0	47	20100729	1	1	0	0	0	1	0	0	0.5	0	1	0	0	1	0	0	0	0	0	3	0	0	0
0	975	1	0	0	47	20100811	0	1	0	1	0	2	0	0	0.5	0	1	0	0	1	1	1	1	0	0	0	0	0	0
0	976	1	0	0	47	20100816	1	1	0	0	0	1	0	0	0.5	1	0	1	2	1	1	0	0	1	2	2	0	0	0
0	977	0	1	0	47	20101027	0	1	0	1	1	0	0	0	0.5	0	1	0	0	1	0	0	0	0	0	1	0	0	0
0	978	0	1	0	47	20101028	0	1	0	1	1	0	0	0	0.5	0	1	0	0	1	0	1	0	0	0	8	0	0	0
1	979	1	0	0	47	20101118	1	1	1	1	0	2	0	0	0.5	1	0	1	2	1	0	1	1	1	1	7	1	1	37
0	980	1	0	0	48	20100408	0	1	0	1	0	1	0	0	0.5	0	1	0	0	1	0	1	1	0	0	8	0	0	0
0	981	1	0	0	48	20100701	1	1	0	1	0	1	0	0	0.5	1	0	1	2	1	1	0	0	1	1	5	0	0	0
0	982	1	0	0	48	20100727	1	1	0	1	0	1	0	0	0.5	0	0	1	1	1	0	0	0	0	0	0	0	0	0
0	983	1	0	0	48	20100818	1	1	0	0	0	1	0	0	0.5	0	1	0	0	0	1	0	0	0	0	3	0	0	0
0	984	1	0	0	48	20101125	1	1	0	0	1	0	0	0	0.5	0	1	0	0	1	1	0	0	0	0	1	0	0	0
0	985	1	0	0	49	20100217	1	1	0	0	0	1	0	0	0.5	0	1	0	0	1	1	0	0	0	0	1	0	0	0
0	986	1	0	0	49	20100226	1	1	0	0	1	0	0	0	0.5	0	0	1	1	1	1	1	0	1	1	4	0	0	0
0	987	1	0	0	49	20100315	1	1	0	1	1	0	0	0	0.5	0	1	0	0	1	0	1	1	0	0	6	0	0	0
0	988	1	0	0	49	20100318	1	1	0	0	0	2	0	0	0.5	0	1	0	0	0	0	0	0	0	0	1	0	0	0
0	989	1	0	0	49	20100412	0	1	0	1	0	2	0	0	0.5	0	1	0	0	1	1	1	0	0	0	2	0	0	0
0	990	0	1	0	49	20100414	1	1	0	0	0	2	0	0	0.5	0	1	1	1	1	1	1	0	1	1	4	0	0	0
0	991	1	0	0	49	20100527	1	1	0	0	0	1	0	0	0.5	0	1	0	0	1	0	0	0	0	0	4	0	0	0
0	992	1	0	0	49	20100614	0	1	0	0	0	1	0	0	0.5	0	1	0	0	1	1	0	1	0	0	3	0	0	0
0	993	1	0	0	49	20100706	0	1	0	1	0	2	0	0	0.5	0	1	0	0	1	0	1	0	0	0	3	0	0	0
0	994	1	0	0	49	20100827	0	1	0	0	0	1	0	0	0.5	0	0	1	1	1	1	1	0	0	0	3	0	0	0
1	995	1	0	0	49	20100831	1	1	1	1	1	0	0	0	0.5	0	1	0	0	0	1	1	1	0	0	8	1	2	37
0	996	1	0	0	49	20100913	1	1	0	1	0	1	0	1	0.5	0	1	0	0	0	1	1	0	0	0	5	0	0	0
0	997	0	1	0	50	20100108	1	1	0	0	0	2	0	2	0.5	0	1	0	0	1	1	1	1	1	3	3	0	0	0
0	998	1	0	0	50	20100112	1	1	0	0	1	0	0	0	0.5	0	1	0	0	1	1	1	1	0	0	1	0	0	0
0	999	1	0	0	50	20100201	1	1	1	0	0	1	0	0	0.5	0	1	0	0	1	0	0	1	0	0	8	0	0	25
0	1000	1	0	0	50	20100319	1	1	0	0	1	0	0	0	0.5	0	1	0	0	1	0	0	0	0	0	15	0	0	0
0	1001	1	0	0	50	20100716	0	1	0	0	1	0	0	0	0.5	0	1	0	0	1	0	0	0	0	0	1	0	0	0
0	1002	0	1	0	50	20100811	1	1	0	0	1	0	0	0	0.5	1	1	1	2	0	0	1	1	0	0	7	0	0	0
0	1003	1	0	0	50	20100818	1	1	0	1	1	0	0	0	0.5	0	1	0	0	0	1	0	1	0	0	3	0	0	0
0	1004	0	1	0	50	20100823	1	1	0	1	0	1	0	0	0.5	1	1	1	2	1	1	0	1	0	0	1	0	0	0
0	1005	0	1	0	50	20100827	1	1	0	0	0	1	0	0	0.5	1	1	1	2	1	0	0	0	0	0	0	0	0	0
0	1006	1	0	0	50	20100901	1	1	0	0	0	1	0	0	0.5	0	1	0	0	0	0	1	1	1	1	8	0	0	1
0	1007	1	0	0	50	20100913	0	1	0	0	1	0	0	0	0.5	0	1	0	0	1	1	0	0	0	0	6	0	0	0
0	1008	1	0	0	50	20100927	0	1	0	0	1	0	0	0	0.5	0	1	0	0	0	1	0	0	0	0	0	0	0	0
0	1009	1	0	0	51	20100210	1	1	0	1	0	1	0	0	0.5	0	1	0	0	1	0	0	1	0	0	0	0	0	0
0	1010	0	1	0	51	20100223	1	1	0	0	0	1	0	0	0.5	0	1	0	0	1	1	0	1	1	2	11	0	0	0
0	1011	1	0	0	51	20100329	1	1	0	1	1	0	0	0	0.5	0	1	0	0	1	1	0	0	0	0	3	0	0	0
0	1012	1	0	0	51	20100617	1	1	0	1	0	1	0	0	0.5	1	0	1	2	1	1	0	1	0	0	11	0	0	0
0	1013	1	0	0	51	20100714	0	1	0	0	0	2	0	0	0.5	0	1	0	0	1	0	0	1	0	0	8	0	0	0
0	1014	1	0	0	51	20100715	1	1	0	0	1	0	0	0	0.5	0	1	0	0	1	0	0	1	0	0	3	0	0	0
0	1015	1	0	0	51	20100924	1	1	0	0	0	1	0	0	0.5	0	0	1	1	1	0	0	1	0	0	7	0	0	0
0	1016	1	0	0	51	20101005	1	1	0	0	0	2	0	0	0.5	0	1	0	0	0	0	0	0	0	0	1	0	0	0
0	1017	0	1	0	51	20101022	1	1	0	1	0	2	0	0	0.5	0	1	0	0	1	0	1	0	0	0	3	0	0	0
0	1018	1	0	0	51	20101118	1	1	0	0	0	2	0	0	0.5	0	1	0	0	1	0	0	0	0	0	8	0	0	0
0	1019	1	0	0	52	20100202	1	1	0	0	0	2	0	0	0.5	0	1	0	0	1	1	1	0	0	0	3	0	0	0
0	1020	1	0	0	52	20100506	0	1	0	0	0	1	0	0	0.5	0	1	0	0	0	1	0	0	0	0	2	0	0	0
0	1021	1	0	0	52	20100507	1	1	0	0	0	1	0	0	0.5	1	0	1	2	1	1	0	0	0	0	12	0	0	0
0	1022	1	0	0	52	20100708	0	1	0	1	0	1	0	0	0.5	0	1	0	0	1	0	0	0	0	0	1	0	0	0
0	1023	0	1	0	52	20100720	1	1	0	1	0	1	0	0	0.5	0	1	0	0	1	1	0	0	0	0	2	0	0	0
0	1024	1	0	0	52	20100813	0	1	0	0	0	2	0	0	0.5	0	1	0	0	1	1	0	1	0	0	3	0	0	0
1	1025	0	1	0	52	20100825	1	1	1	0	0	1	0	0	0.5	1	1	1	2	0	1	1	0	0	0	1	1	4	19
0	1026	1	0	0	52	20100831	0	1	0	1	0	1	0	0	0.5	0	1	0	0	0	1	1	0	1	1	4	0	0	0
0	1027	0	1	0	52	20101102	1	1	0	1	1	0	0	0	0.5	0	1	0	0	1	0	1	1	0	0	0	0	0	0
0	1028	1	0	0	53	20100125	1	1	0	0	1	0	0	0	0.5	0	1	0	0	1	0	0	1	0	0	10	0	0	0
0	1029	1	0	0	53	20100305	1	1	0	0	1	0	0	0	0.5	0	1	0	0	1	1	0	0	0	0	11	0	0	0
0	1030	1	0	0	53	20100503	1	1	0	1	0	2	0	0	0.5	1	0	1	2	1	1	0	0	0	0	0	0	0	0
0	1031	1	0	0	53	20100804	0	1	0	1	0	2	0	0	0.5	0	1	0	0	1	0	0	0	0	0	11	0	0	0
0	1032	1	0	0	53	20100920	1	1	0	1	1	0	0	0	0.5	0	1	0	0	1	1	0	1	1	6	8	0	0	2
0	1033	0	1	0	53	20101018	0	1	0	0	0	1	0	0	0.5	0	1	0	0	1	1	0	0	0	0	0	0	0	0
0	1034	1	0	0	53	20101025	1	1	0	0	0	1	0	0	0.5	0	1	0	0	0	1	0	0	0	0	3	0	0	0
0	1035	1	0	0	53	20101231	1	1	0	0	1	0	0	0	0.5	0	0	1	1	0	0	0	1	1	3	7	0	0	0
0	1036	1	0	0	54	20100719	1	1	0	0	0	1	0	0	0.5	0	1	0	0	1	0	0	1	0	0	9	0	0	0
0	1037	1	0	0	54	20100805	1	1	0	0	0	2	0	0	0.5	0	1	0	0	0	0	0	0	0	0	4	0	0	0
0	1038	1	0	0	54	20100827	1	1	0	0	0	1	0	0	0.5	0	1	0	0	1	0	0	0	0	0	3	0	0	0
0	1039	1	0	0	54	20100906	0	1	0	0	0	1	0	0	0.5	0	1	0	0	1	1	0	0	0	0	0	0	0	0
0	1040	0	1	0	54	20100927	0	1	0	1	0	2	0	0	0.5	0	1	1	1	0	0	0	0	1	1	1	0	0	0
0	1041	1	0	1	55	20100224	0	1	0	1	0	1	0	0	0.5	0	1	0	0	1	0	0	1	0	0	4	0	0	0
0	1042	1	0	1	55	20100430	1	1	0	1	0	1	0	0	0.5	0	1	0	0	1	0	0	1	1	5	6	0	0	0
0	1043	1	0	1	55	20100517	1	1	0	0	0	1	0	0	0.5	0	1	0	0	1	0	0	0	0	0	0	0	0	0
0	1044	0	1	1	55	20100809	1	1	0	1	0	1	0	0	0.5	1	1	1	2	0	0	0	0	0	0	7	0	0	0
0	1045	0	1	1	55	20100825	1	1	0	0	1	0	0	2	0.5	0	1	0	0	0	0	1	0	0	0	2	0	0	0
0	1046	0	1	1	55	20100909	1	1	0	0	0	1	0	0	0.5	0	1	0	0	0	0	1	1	0	0	10	0	0	1
0	1047	1	0	1	55	20100914	1	1	0	1	0	2	0	0	0.5	0	1	0	0	1	1	0	0	0	0	14	0	0	0
0	1048	1	0	1	56	20100125	0	1	0	0	1	0	0	0	0.5	0	1	0	0	1	0	0	0	0	0	2	0	0	0
0	1049	0	1	1	56	20100422	1	1	0	1	0	2	0	0	0.5	0	1	0	0	1	1	1	0	0	0	3	0	0	0
0	1050	1	0	1	56	20100503	1	1	0	1	0	1	0	0	0.5	0	1	0	0	0	0	0	0	0	0	0	0	0	0
0	1051	0	1	1	56	20100708	0	1	0	1	0	1	0	0	0.5	0	1	0	0	1	0	1	0	1	8	9	0	0	0
0	1052	1	0	1	57	20100201	1	1	0	0	1	0	0	1	0.5	0	0	1	1	1	1	0	0	1	1	1	0	0	0
0	1053	0	1	1	57	20100329	0	1	0	1	0	1	0	0	0.5	0	1	1	1	0	0	1	0	1	1	1	0	0	0
0	1054	1	0	1	57	20100621	1	1	0	0	1	0	0	0	0.5	0	0	1	1	1	1	1	1	1	3	12	0	0	0
0	1055	1	0	1	57	20100817	1	1	0	1	0	1	0	0	0.5	0	1	0	0	1	0	1	0	0	0	3	0	0	0
0	1056	1	0	1	57	20100927	1	1	0	0	0	1	0	0	0.5	1	0	1	2	0	1	1	1	1	1	11	0	0	0
0	1057	1	0	1	57	20101008	1	1	0	0	0	1	0	0	0.5	0	1	0	0	1	0	0	1	0	0	15	0	0	0
0	1058	1	0	1	57	20101011	1	1	0	1	1	0	0	0	0.5	0	1	0	0	1	1	0	0	0	0	3	0	0	0
0	1059	1	0	1	58	20100407	0	1	0	1	0	1	0	0	0.5	0	1	0	0	1	1	0	0	0	0	0	0	0	0
0	1060	1	0	1	58	20100419	1	1	0	0	0	1	0	0	0.5	0	1	0	0	1	0	1	1	0	0	1	0	0	0
0	1061	1	0	1	58	20100601	0	1	0	1	0	1	0	0	0.5	0	1	0	0	1	0	1	0	0	0	3	0	0	0
0	1062	1	0	1	58	20100929	1	1	0	1	0	2	0	0	0.5	1	0	1	2	1	1	0	0	1	1	5	0	0	0
0	1063	1	0	1	58	20101006	1	1	0	1	0	1	0	0	0.5	0	1	0	0	1	0	0	0	0	0	2	0	0	0
0	1064	1	0	1	60	20100823	0	1	0	0	0	1	0	0	0.5	0	1	0	0	1	1	0	0	0	0	4	0	0	0
0	1065	1	0	1	60	20100908	1	1	0	0	0	1	0	0	0.5	1	0	1	2	1	1	0	1	1	3	5	0	0	0
0	1066	1	0	1	61	20100720	0	1	0	1	0	1	0	0	0.5	0	1	0	0	0	0	0	0	0	0	2	0	0	0
0	1067	0	1	1	61	20101018	0	1	0	0	1	0	0	0	0.5	0	1	0	0	1	1	0	0	0	0	1	0	0	0
1	1068	1	0	1	62	20100507	1	1	1	1	0	1	0	2	0.5	1	0	1	2	1	0	1	0	1	2	3	1	4	21
0	1069	1	0	1	62	20100607	1	1	0	1	1	0	0	0	0.5	0	1	0	0	0	0	0	0	0	0	6	0	0	0
0	1070	1	0	1	62	20100730	0	1	0	0	0	2	0	0	0.5	0	1	0	0	1	1	1	0	0	0	2	0	0	0
0	1071	1	0	1	62	20100818	1	1	0	0	0	1	0	0	0.5	0	1	0	0	0	0	1	0	0	0	1	0	0	0
0	1072	1	0	1	62	20100825	0	1	0	1	0	1	0	0	0.5	0	1	0	0	1	1	0	0	1	1	2	0	0	0
0	1073	1	0	1	62	20101015	0	1	0	1	1	0	0	0	0.5	0	1	0	0	1	1	0	0	0	0	1	0	0	0
0	1074	0	1	1	62	20101027	1	1	0	2	0	1	0	0	0.5	0	1	0	0	0	0	0	0	0	0	0	0	0	0
0	1075	1	0	1	63	20100115	1	1	0	0	0	1	0	0	0.5	0	1	0	0	0	0	1	1	0	0	2	0	0	0
0	1076	1	0	1	63	20100507	1	1	0	1	0	1	0	0	0.5	0	1	0	0	1	1	0	0	1	1	4	0	0	0
0	1077	1	0	1	63	20101022	1	1	0	1	1	0	0	0	0.5	0	1	0	0	1	1	0	0	1	3	7	0	0	0
0	1078	1	0	1	64	20100315	1	1	0	1	0	1	0	2	0.5	0	1	0	0	1	1	1	1	1	2	5	0	0	0
0	1079	1	0	1	64	20100510	1	1	0	1	1	0	0	0	0.5	0	1	0	0	1	1	0	0	0	0	0	0	0	0
0	1080	1	0	1	65	20100119	1	1	0	1	1	0	0	0	0.5	0	1	0	0	1	1	0	0	0	0	7	0	0	0
0	1081	1	0	1	66	20100927	1	1	3	1	1	0	0	0	0.5	1	0	1	2	0	1	0	0	0	0	0	0	0	17
0	1082	0	1	1	66	20101021	1	1	0	1	0	2	0	0	0.5	0	1	0	0	1	1	0	0	0	0	0	0	0	0
0	1083	1	0	1	67	20100621	1	1	0	1	0	1	0	0	0.5	0	0	1	1	1	0	0	0	0	0	0	0	0	0
0	1084	1	0	1	67	20101001	1	1	0	0	1	0	0	0	0.5	0	1	0	0	1	0	0	0	0	0	1	0	0	0
0	1085	1	0	1	71	20100317	1	1	0	1	0	1	0	0	0.5	0	1	0	0	1	1	1	0	0	0	1	0	0	5
0	1086	1	0	0	49	20110207	1	0	0	1	0	1	0	0	0.015	0	1	0	0	0	0	0	0	0	0	0	0	0	0
0	1087	1	0	0	35	20110114	0	1	0	1	0	1	0	0	0.1	0	0	1	1	1	0	0	0	0	0	1	0	0	0
0	1088	1	0	0	41	20110125	0	1	0	0	1	0	0	0	0.1	0	1	0	0	1	0	0	0	0	0	1	0	0	0
0	1089	0	1	0	50	20110419	0	1	0	1	0	1	0	0	0.1	0	1	0	0	1	0	0	0	0	0	6	0	0	0
0	1090	1	0	0	43	20110516	0	1	0	0	0	1	0	0	0.1	0	1	0	0	1	0	0	0	0	0	1	0	0	0
0	1091	1	0	0	29	20110603	0	1	0	1	0	1	0	0	0.1	0	1	0	0	1	0	0	0	1	2	3	0	0	0
0	1092	0	1	0	50	20110705	0	0	0	1	0	2	0	0	0.1	0	1	0	0	0	0	0	0	0	0	9	0	0	0
0	1093	1	0	1	66	20110720	1	1	0	1	1	0	0	0	0.1	1	0	1	2	0	0	0	0	0	0	5	0	0	0
0	1094	1	0	0	53	20110822	0	1	0	1	0	2	0	0	0.1	0	1	0	0	1	0	0	0	0	0	8	0	0	0
0	1095	1	0	0	42	20110901	0	1	0	1	0	1	0	0	0.1	0	1	0	0	1	0	0	1	0	0	8	0	0	0
0	1096	1	0	1	60	20110916	0	1	0	1	0	2	0	0	0.1	0	1	0	0	1	0	0	1	1	1	6	0	0	0
0	1097	1	0	0	53	20111018	0	1	0	1	0	2	0	0	0.1	0	1	0	0	1	0	0	0	0	0	1	0	0	0
0	1098	1	0	1	55	20111025	0	1	0	1	0	2	0	0	0.1	0	1	0	0	1	0	0	0	1	1	3	0	0	0
1	1099	1	0	1	71	20111027	1	1	1	0	1	0	0	0	0.1	1	0	1	2	1	0	0	0	1	1	8	1	3	19
0	1100	1	0	0	37	20111115	0	1	0	0	1	0	0	0	0.1	0	1	0	0	1	0	0	0	0	0	0	0	0	0
0	1101	1	0	0	51	20111207	0	1	0	1	1	0	0	0	0.1	0	1	0	0	0	0	0	0	0	0	2	0	0	0
0	1102	1	0	0	50	20110824	0	1	0	0	0	1	0	0	0.15	0	1	0	0	1	0	0	0	0	0	0	0	0	0
0	1103	1	0	0	35	20110909	0	1	0	1	0	1	0	0	0.15	0	1	0	0	1	0	0	1	0	0	1	0	0	0
0	1104	1	0	0	33	20111024	0	1	0	1	0	1	0	0	0.15	0	1	0	0	1	0	0	0	1	1	3	0	0	0
0	1105	1	0	0	40	20111124	1	1	0	1	0	1	0	0	0.15	0	1	0	0	1	0	0	0	0	0	3	0	0	0
0	1106	1	0	0	47	20110103	0	1	0	0	0	2	0	0	0.2	0	1	0	0	1	0	0	1	0	0	5	0	0	0
0	1107	1	0	0	40	20110104	1	1	0	1	0	2	0	0	0.2	0	1	0	0	1	0	0	1	0	0	3	0	0	2
0	1108	1	0	0	28	20110104	1	1	0	2	0	1	0	0	0.2	0	1	0	0	1	0	0	0	0	0	0	0	0	0
0	1109	0	1	0	28	20110107	1	1	0	0	0	1	0	1	0.2	0	1	0	0	1	1	0	0	0	0	0	0	0	0
0	1110	1	0	0	35	20110110	0	0	0	0	0	2	0	0	0.2	0	1	0	0	0	0	0	1	0	0	1	0	0	0
0	1111	1	0	0	44	20110111	1	1	0	0	0	1	0	0	0.2	0	1	0	0	1	0	0	1	0	0	1	0	0	0
0	1112	1	0	1	55	20110112	1	1	0	1	0	1	0	0	0.2	0	1	0	0	1	0	0	1	0	0	6	0	0	0
0	1113	1	0	0	42	20110117	0	1	0	0	0	1	0	0	0.2	0	1	0	0	1	0	0	1	1	1	5	0	0	0
0	1114	1	0	0	54	20110118	1	1	0	1	1	0	0	0	0.2	0	1	0	0	1	0	0	1	0	0	15	0	0	0
0	1115	1	0	0	37	20110124	0	1	0	1	0	2	0	0	0.2	0	1	0	0	1	1	0	0	1	1	3	0	0	0
0	1116	0	1	0	54	20110209	0	1	0	0	0	2	0	0	0.2	0	1	0	0	1	0	0	1	0	0	4	0	0	0
0	1117	0	1	0	33	20110210	0	1	0	0	0	2	0	0	0.2	0	1	0	0	1	0	0	0	0	0	3	0	0	0
0	1118	1	0	0	40	20110211	0	1	0	0	0	1	0	0	0.2	0	1	0	0	1	0	0	0	0	0	0	0	0	0
0	1119	1	0	0	46	20110214	1	1	0	1	0	1	0	0	0.2	0	1	0	0	1	0	0	0	0	0	2	0	0	0
0	1120	1	0	0	43	20110215	0	1	0	1	0	1	0	0	0.2	0	1	0	0	1	0	0	0	0	0	0	0	0	0
0	1121	1	0	0	47	20110222	1	1	0	0	0	1	0	0	0.2	0	1	0	0	1	0	1	1	0	0	5	0	0	0
0	1122	1	0	0	42	20110228	0	1	0	1	0	1	0	0	0.2	0	1	0	0	1	0	0	0	0	0	3	0	0	0
0	1123	1	0	0	48	20110302	1	1	0	0	0	1	0	0	0.2	0	1	0	0	1	0	0	0	0	0	4	0	0	0
0	1124	1	0	0	46	20110303	0	1	0	1	0	1	0	0	0.2	1	0	1	2	0	1	0	0	0	0	2	0	0	0
0	1125	1	0	0	41	20110304	0	1	0	0	0	1	0	0	0.2	0	1	0	0	1	1	0	0	0	0	1	0	0	0
0	1126	0	1	1	63	20110307	0	1	0	0	1	0	0	0	0.2	0	1	0	0	1	0	0	0	0	0	2	0	0	0
0	1127	0	1	0	35	20110315	0	1	0	1	0	1	0	0	0.2	0	1	0	0	0	0	0	0	0	0	3	0	0	0
0	1128	1	0	0	52	20110329	1	1	0	0	0	1	0	0	0.2	0	1	0	0	1	0	0	1	0	0	10	0	0	0
0	1129	1	0	1	59	20110405	0	1	0	1	0	1	0	0	0.2	0	1	0	0	1	0	0	0	0	0	8	0	0	0
0	1130	1	0	1	64	20110411	1	1	0	1	0	2	0	0	0.2	0	1	0	0	1	0	0	0	0	0	1	0	0	0
0	1131	1	0	0	47	20110411	0	1	0	0	1	0	0	0	0.2	0	1	0	0	1	0	0	0	0	0	0	0	0	0
0	1132	0	1	0	39	20110421	1	1	0	1	0	2	0	0	0.2	0	1	1	1	1	0	0	0	0	0	9	0	0	0
0	1133	1	0	1	72	20110421	0	1	0	1	1	0	0	0	0.2	0	1	0	0	1	0	0	1	0	0	0	0	0	0
0	1134	1	0	0	46	20110426	0	1	0	1	0	1	0	0	0.2	0	1	0	0	0	0	0	0	0	0	5	0	0	0
0	1135	1	0	0	30	20110512	0	1	0	0	0	1	0	0	0.2	0	1	0	0	0	0	0	1	0	0	0	0	0	0
0	1136	1	0	0	42	20110512	0	0	0	0	1	0	0	0	0.2	0	1	0	0	1	0	0	1	0	0	0	0	0	0
0	1137	1	0	0	44	20110516	1	1	0	0	0	1	0	0	0.2	0	1	0	0	1	1	0	1	1	1	11	0	0	0
0	1138	1	0	0	39	20110517	0	0	0	1	0	1	0	0	0.2	0	1	0	0	1	1	0	0	0	0	0	0	0	0
0	1139	1	0	0	48	20110527	0	1	0	1	1	0	0	0	0.2	0	1	0	0	1	1	0	0	0	0	0	0	0	0
0	1140	1	0	0	31	20110607	0	1	0	0	0	1	0	0	0.2	0	1	0	0	0	0	0	0	0	0	4	0	0	0
0	1141	1	0	0	38	20110607	1	1	0	0	1	0	0	0	0.2	0	1	0	0	1	0	0	0	0	0	1	0	0	0
0	1142	1	0	1	62	20110610	0	1	0	0	0	1	0	0	0.2	0	0	1	1	1	0	1	0	0	0	0	0	0	0
0	1143	1	0	0	45	20110610	0	1	0	0	0	2	0	1	0.2	0	1	0	0	1	0	0	1	0	0	4	0	0	0
0	1144	1	0	1	71	20110613	1	1	0	1	1	0	0	0	0.2	0	1	0	0	1	0	0	1	0	0	5	0	0	0
0	1145	1	0	0	35	20110620	0	1	0	0	0	1	0	0	0.2	0	1	0	0	1	0	0	0	0	0	1	0	0	0
0	1146	1	0	0	51	20110707	0	0	0	0	0	1	0	0	0.2	0	1	0	0	1	1	0	0	0	0	0	0	0	0
0	1147	1	0	0	50	20110711	0	1	0	0	0	1	0	0	0.2	0	1	0	0	0	0	0	0	1	1	2	0	0	0
0	1148	1	0	0	49	20110719	1	1	0	0	0	2	0	0	0.2	0	1	0	0	1	0	0	1	0	0	13	0	0	3
0	1149	1	0	0	52	20110725	0	1	0	1	0	2	0	0	0.2	0	1	0	0	1	1	0	0	0	0	3	0	0	0
0	1150	1	0	0	32	20110728	1	1	0	0	0	2	0	0	0.2	0	0	1	1	1	1	0	0	0	0	3	0	0	0
0	1151	1	0	0	41	20110809	1	1	0	0	0	1	0	0	0.2	1	0	1	2	1	0	0	0	0	0	1	0	0	0
0	1152	1	0	0	40	20110809	0	1	0	1	0	1	0	0	0.2	0	1	0	0	1	1	0	0	0	0	0	0	0	0
0	1153	0	1	0	38	20110810	0	1	0	1	0	2	0	0	0.2	0	1	0	0	1	0	0	0	0	0	1	0	0	0
0	1154	1	0	0	35	20110810	1	1	0	0	0	1	0	0	0.2	0	1	0	0	1	0	1	1	1	5	8	0	0	0
0	1155	1	0	0	39	20110810	0	1	0	1	0	1	0	0	0.2	0	1	0	0	1	0	0	0	0	0	2	0	0	0
0	1156	1	0	0	53	20110825	0	1	0	1	0	1	0	0	0.2	0	1	0	0	1	0	0	0	0	0	1	0	0	0
0	1157	1	0	0	45	20110830	0	1	0	1	0	1	0	0	0.2	0	1	0	0	1	1	1	1	0	0	10	0	0	0
0	1158	1	0	1	60	20110831	0	1	0	0	0	1	0	0	0.2	0	1	0	0	1	1	0	0	0	0	1	0	0	0
0	1159	1	0	1	60	20110901	0	1	0	0	0	1	0	0	0.2	0	1	0	0	1	0	0	0	0	0	0	0	0	0
0	1160	1	0	1	56	20110905	0	1	0	0	1	0	0	0	0.2	0	1	0	0	1	0	0	1	0	0	12	0	0	0
0	1161	1	0	0	34	20110916	0	1	0	0	0	1	0	0	0.2	0	1	0	0	1	0	1	0	0	0	3	0	0	0
0	1162	1	0	1	55	20110921	0	1	0	1	0	1	0	0	0.2	0	1	0	0	1	0	0	0	0	0	0	0	0	0
0	1163	1	0	0	39	20110926	0	1	0	2	0	2	0	0	0.2	0	1	0	0	1	0	1	0	0	0	1	0	0	0
0	1164	1	0	0	39	20111013	1	1	0	0	0	1	0	0	0.2	0	1	0	0	0	0	0	0	0	0	2	0	0	0
0	1165	1	0	0	44	20111024	0	1	0	0	0	2	0	0	0.2	0	1	0	0	1	1	1	0	0	0	5	0	0	0
0	1166	1	0	0	38	20111114	0	1	0	0	0	1	0	0	0.2	0	1	0	0	0	0	0	0	0	0	0	0	0	0
0	1167	0	1	0	53	20111115	1	1	0	0	1	0	0	0	0.2	0	1	0	0	1	0	1	0	0	0	1	0	0	0
0	1168	1	0	1	61	20111121	1	1	0	1	0	1	0	0	0.2	0	1	0	0	1	0	0	0	1	2	2	0	0	0
0	1169	1	0	0	45	20111124	0	1	0	1	0	1	0	0	0.2	0	1	0	0	1	1	0	0	0	0	0	0	0	0
0	1170	1	0	0	44	20111202	0	1	0	1	0	2	0	0	0.2	0	1	0	0	1	0	1	0	0	0	2	0	0	0
0	1171	1	0	0	42	20111202	1	1	0	0	0	2	0	0	0.2	0	1	0	0	1	0	0	0	1	2	5	0	0	0
0	1172	1	0	0	53	20111202	1	1	0	1	1	0	0	0	0.2	0	1	0	0	1	0	0	1	0	0	3	0	0	0
0	1173	1	0	0	46	20111214	0	1	0	1	1	0	0	0	0.2	0	1	0	0	1	0	1	0	0	0	1	0	0	0
0	1174	1	0	1	59	20111220	0	1	0	1	0	1	0	0	0.2	0	1	0	0	1	1	0	0	0	0	0	0	0	0
0	1175	1	0	0	19	20111221	1	1	0	1	0	2	0	0	0.2	0	1	0	0	1	0	0	1	1	1	12	0	0	0
0	1176	0	1	1	57	20111222	0	1	0	0	0	2	0	0	0.2	0	1	0	0	1	0	0	1	0	0	11	0	0	0
0	1177	1	0	0	37	20111227	1	1	0	1	1	0	0	0	0.2	1	0	1	2	1	1	0	1	0	0	13	0	0	0
0	1178	1	0	0	31	20110906	1	1	1	1	0	1	0	0	0.25	0	0	1	1	1	0	1	1	0	0	3	0	0	23
0	1179	1	0	1	55	20111012	1	1	0	0	0	2	0	0	0.25	0	1	0	0	1	0	0	0	0	0	0	0	0	0
1	1180	1	0	0	36	20110104	1	1	1	0	0	1	0	0	0.3	0	1	0	0	1	0	0	1	1	1	19	1	2	48
0	1181	1	0	0	38	20110104	1	1	0	1	0	1	0	0	0.3	0	1	0	0	1	0	0	1	0	0	7	0	0	0
0	1182	0	1	0	35	20110105	0	1	0	1	0	2	0	0	0.3	0	1	0	0	1	0	0	0	0	0	4	0	0	0
0	1183	1	0	1	58	20110107	1	1	0	0	0	1	0	0	0.3	0	1	0	0	1	0	0	0	0	0	1	0	0	0
0	1184	1	0	0	34	20110111	0	1	0	1	0	1	0	0	0.3	0	1	0	0	1	0	1	0	0	0	1	0	0	0
0	1185	1	0	0	50	20110112	0	1	0	1	0	1	0	0	0.3	0	1	0	0	1	0	0	0	1	3	3	0	0	0
0	1186	0	1	0	48	20110112	1	1	0	0	0	2	0	0	0.3	0	1	0	0	1	0	0	0	0	0	1	0	0	0
0	1187	1	0	0	44	20110117	1	1	0	0	0	1	0	0	0.3	0	1	0	0	1	0	0	0	0	0	1	0	0	0
0	1188	0	1	0	44	20110117	1	1	0	0	0	1	0	0	0.3	0	1	0	0	1	0	0	0	0	0	5	0	0	0
0	1189	1	0	0	43	20110118	0	1	0	0	1	0	0	0	0.3	0	1	0	0	1	0	1	0	1	1	4	0	0	0
0	1190	1	0	0	36	20110120	1	1	0	1	0	1	0	0	0.3	0	0	1	1	1	0	1	0	0	0	2	0	0	0
0	1191	1	0	0	47	20110121	0	1	0	0	1	0	0	1	0.3	0	1	0	0	1	0	0	0	1	1	2	0	0	0
0	1192	1	0	1	61	20110125	1	1	0	0	1	0	0	0	0.3	0	1	0	0	1	0	0	1	0	0	1	0	0	0
0	1193	1	0	0	54	20110125	1	1	0	0	1	0	0	0	0.3	0	1	0	0	1	1	0	1	0	0	5	0	0	0
0	1194	1	0	0	39	20110128	0	0	0	1	0	2	0	0	0.3	0	1	0	0	0	0	0	1	0	0	6	0	0	0
0	1195	1	0	0	52	20110128	0	1	0	0	0	1	0	0	0.3	0	1	0	0	1	0	0	1	0	0	3	0	0	0
0	1196	1	0	0	45	20110208	1	1	0	0	0	2	0	0	0.3	0	1	0	0	1	0	0	1	1	2	5	0	0	0
0	1197	1	0	0	49	20110209	0	1	0	0	1	0	0	0	0.3	0	1	0	0	0	0	0	0	0	0	0	0	0	0
0	1198	1	0	1	65	20110210	1	1	0	1	0	2	0	0	0.3	0	0	1	1	1	1	0	1	1	1	9	0	0	0
0	1199	1	0	0	35	20110211	0	1	0	0	1	0	0	0	0.3	0	1	0	0	0	0	0	0	1	1	1	0	0	0
0	1200	1	0	1	65	20110215	1	1	0	1	0	2	0	0	0.3	0	1	0	0	1	1	0	1	0	0	5	0	0	0
0	1201	1	0	1	69	20110215	0	1	0	1	0	1	0	0	0.3	0	1	0	0	1	0	0	1	0	0	5	0	0	0
0	1202	1	0	0	42	20110217	0	1	0	0	0	2	0	0	0.3	0	1	0	0	1	0	0	0	0	0	3	0	0	0
0	1203	1	0	1	62	20110221	0	1	0	0	0	2	0	0	0.3	0	0	1	1	1	1	1	0	1	1	7	0	0	0
0	1204	1	0	0	53	20110222	0	1	0	0	1	0	0	0	0.3	0	0	1	1	1	0	0	0	0	0	9	0	0	0
0	1205	1	0	0	40	20110222	0	1	0	0	0	2	0	0	0.3	0	1	0	0	1	0	0	0	0	0	2	0	0	0
0	1206	0	1	0	39	20110223	1	1	0	1	1	0	0	0	0.3	0	1	0	0	1	0	0	0	1	2	2	0	0	0
0	1207	1	0	1	72	20110228	1	0	0	1	0	1	0	0	0.3	0	1	0	0	1	1	1	1	0	0	0	0	0	0
0	1208	1	0	0	49	20110303	0	1	0	1	1	0	0	0	0.3	0	1	0	0	0	0	0	1	0	0	2	0	0	1
0	1209	1	0	0	54	20110307	0	1	0	1	0	1	0	0	0.3	0	1	0	0	1	1	0	0	0	0	4	0	0	0
0	1210	0	1	0	46	20110308	0	1	0	0	0	1	0	0	0.3	0	1	1	1	1	0	1	1	1	2	8	0	0	0
0	1211	1	0	1	61	20110310	1	1	0	0	0	1	0	0	0.3	1	0	1	2	1	0	1	1	0	0	10	0	0	0
0	1212	1	0	0	49	20110314	0	1	0	1	0	1	0	0	0.3	0	1	0	0	1	1	0	0	0	0	3	0	0	0
0	1213	1	0	0	39	20110314	0	1	0	0	0	1	0	0	0.3	0	1	0	0	1	1	0	0	0	0	4	0	0	0
0	1214	1	0	0	34	20110324	0	1	0	1	1	0	0	0	0.3	0	1	0	0	1	0	1	1	0	0	4	0	0	0
0	1215	1	0	0	38	20110324	1	1	0	1	0	1	0	0	0.3	0	1	0	0	1	0	0	0	0	0	0	0	0	0
0	1216	1	0	0	48	20110324	1	1	0	0	1	0	0	0	0.3	0	1	0	0	0	0	0	0	0	0	8	0	0	0
0	1217	1	0	0	39	20110328	0	1	0	0	0	1	0	1	0.3	0	1	0	0	0	0	0	0	0	0	0	0	0	0
0	1218	1	0	0	48	20110330	0	1	0	1	0	1	0	0	0.3	0	1	0	0	1	0	0	1	0	0	9	0	0	0
0	1219	1	0	0	43	20110331	0	1	0	1	0	1	0	0	0.3	0	1	0	0	1	0	0	1	0	0	0	0	0	0
0	1220	1	0	0	49	20110331	0	1	0	1	0	1	0	0	0.3	0	1	0	0	1	0	0	0	0	0	1	0	0	0
0	1221	0	1	1	69	20110404	1	1	0	1	0	1	0	0	0.3	0	1	0	0	1	0	0	1	1	1	1	0	0	0
0	1222	0	1	0	37	20110407	0	1	0	1	0	1	0	0	0.3	0	1	0	0	1	0	0	0	0	0	0	0	0	0
0	1223	0	1	0	50	20110414	0	1	0	0	0	1	0	0	0.3	0	1	0	0	0	0	0	0	0	0	0	0	0	0
0	1224	0	1	0	51	20110418	0	1	0	1	1	0	0	0	0.3	0	1	1	1	1	0	0	0	0	0	2	0	0	0
0	1225	0	1	0	37	20110418	0	1	0	0	0	2	0	0	0.3	0	1	0	0	1	0	1	0	0	0	0	0	0	0
0	1226	1	0	1	58	20110420	1	1	0	0	0	1	0	0	0.3	0	0	1	1	0	0	0	1	0	0	1	0	0	0
0	1227	1	0	0	51	20110420	0	1	0	0	0	1	0	0	0.3	0	1	0	0	1	0	0	1	0	0	7	0	0	0
0	1228	1	0	1	58	20110422	0	1	0	1	0	2	0	0	0.3	0	1	0	0	1	0	0	0	0	0	5	0	0	0
0	1229	1	0	1	64	20110425	1	1	0	0	0	1	0	0	0.3	1	0	1	2	0	0	0	0	0	0	6	0	0	0
0	1230	1	0	1	55	20110427	0	1	0	1	0	1	0	0	0.3	0	1	0	0	1	0	0	0	0	0	6	0	0	0
0	1231	0	1	0	39	20110427	0	1	0	0	0	1	0	0	0.3	0	1	0	0	1	0	1	0	0	0	5	0	0	0
0	1232	1	0	0	51	20110503	0	0	0	1	0	1	0	0	0.3	0	1	0	0	1	1	0	0	0	0	3	0	0	0
0	1233	1	0	0	28	20110506	0	1	0	1	0	1	0	0	0.3	0	1	0	0	1	1	0	0	0	0	1	0	0	0
0	1234	1	0	1	62	20110506	1	1	0	0	0	1	0	1	0.3	0	1	0	0	0	0	0	0	0	0	2	0	0	0
0	1235	1	0	0	43	20110511	0	1	0	1	0	1	0	0	0.3	0	1	0	0	0	0	0	0	0	0	1	0	0	0
0	1236	1	0	0	49	20110513	0	1	0	0	1	0	0	0	0.3	0	1	0	0	0	0	0	0	0	0	2	0	0	0
0	1237	1	0	0	29	20110513	0	0	0	0	0	2	0	0	0.3	0	1	0	0	1	0	0	0	0	0	0	0	0	0
0	1238	1	0	1	62	20110516	1	1	0	1	0	1	0	0	0.3	0	1	0	0	1	0	0	0	0	0	1	0	0	0
0	1239	0	1	0	35	20110516	0	1	0	0	1	0	0	0	0.3	0	1	0	0	1	0	0	0	0	0	2	0	0	0
0	1240	1	0	1	55	20110523	0	1	0	0	0	1	0	0	0.3	0	1	0	0	1	0	0	0	0	0	1	0	0	0
0	1241	1	0	0	34	20110523	0	1	0	1	0	2	0	0	0.3	0	1	0	0	1	0	0	1	0	0	8	0	0	0
0	1242	1	0	0	51	20110524	0	0	0	1	0	2	0	1	0.3	0	1	0	0	0	0	0	0	0	0	6	0	0	0
0	1243	1	0	0	44	20110527	0	1	0	0	1	0	0	0	0.3	0	1	0	0	1	0	0	1	0	0	0	0	0	0
0	1244	1	0	0	46	20110527	0	1	0	1	0	1	0	0	0.3	0	1	0	0	1	1	0	0	0	0	1	0	0	0
0	1245	1	0	1	57	20110530	0	1	0	0	0	1	0	0	0.3	0	1	0	0	1	0	0	0	0	0	4	0	0	0
0	1246	1	0	0	35	20110531	0	1	0	0	0	1	0	0	0.3	0	1	0	0	1	1	0	0	0	0	0	0	0	0
0	1247	1	0	0	35	20110602	1	1	0	0	0	2	0	0	0.3	0	1	0	0	1	0	1	0	0	0	9	0	0	0
0	1248	1	0	0	40	20110602	1	1	0	0	1	0	0	0	0.3	0	1	0	0	1	0	0	0	1	1	7	0	0	0
0	1249	1	0	0	31	20110603	0	1	0	0	0	1	0	0	0.3	0	1	0	0	1	0	0	0	1	1	1	0	0	0
0	1250	1	0	0	40	20110603	1	1	0	1	0	2	0	0	0.3	0	0	1	1	0	0	0	0	0	0	2	0	0	0
0	1251	1	0	0	41	20110603	1	1	0	0	1	0	0	0	0.3	0	1	0	0	1	1	0	1	1	1	16	0	0	0
0	1252	0	1	0	50	20110607	1	1	0	0	0	1	0	0	0.3	0	1	0	0	0	0	0	1	0	0	7	0	0	0
0	1253	1	0	0	35	20110613	0	1	0	1	0	1	0	1	0.3	0	1	0	0	1	0	0	1	0	0	14	0	0	0
0	1254	1	0	0	37	20110613	0	1	1	1	0	1	0	0	0.3	0	1	0	0	1	1	0	0	1	1	2	0	0	2
0	1255	1	0	0	50	20110614	1	1	1	1	1	0	0	1	0.3	0	1	0	0	1	0	0	1	0	0	4	0	0	3
0	1256	1	0	0	30	20110615	0	1	0	1	0	2	0	0	0.3	0	1	0	0	1	1	0	0	0	0	1	0	0	0
0	1257	1	0	0	46	20110616	1	1	0	0	0	2	0	0	0.3	0	1	0	0	1	0	0	0	0	0	9	0	0	0
0	1258	1	0	0	37	20110620	0	1	0	1	0	1	0	0	0.3	0	1	0	0	1	0	0	0	1	1	2	0	0	0
0	1259	0	1	0	51	20110620	0	1	0	1	0	2	0	0	0.3	0	1	0	0	1	0	0	0	0	0	1	0	0	0
0	1260	1	0	0	25	20110622	1	1	0	1	1	0	0	0	0.3	0	1	0	0	1	0	0	1	0	0	6	0	0	0
0	1261	1	0	1	62	20110627	1	1	0	1	0	1	0	0	0.3	0	0	1	1	1	0	0	1	0	0	6	0	0	0
0	1262	1	0	0	50	20110627	0	1	0	0	1	0	0	0	0.3	0	1	0	0	1	0	0	0	0	0	2	0	0	0
0	1263	0	1	0	32	20110627	0	1	0	0	1	0	0	0	0.3	0	1	0	0	1	0	0	0	0	0	6	0	0	0
0	1264	1	0	0	53	20110629	0	1	0	0	0	1	0	0	0.3	0	1	0	0	1	1	0	0	0	0	1	0	0	0
0	1265	0	1	0	49	20110705	0	1	0	1	1	0	0	0	0.3	0	1	0	0	1	0	0	0	1	1	4	0	0	0
0	1266	1	0	0	40	20110708	0	1	0	0	0	1	0	0	0.3	0	1	0	0	0	0	1	0	0	0	0	0	0	0
0	1267	0	1	0	39	20110711	0	1	0	1	1	0	0	0	0.3	0	1	0	0	1	1	0	0	0	0	2	0	0	0
0	1268	1	0	1	62	20110712	0	1	0	0	1	0	0	0	0.3	0	1	0	0	1	1	0	0	0	0	3	0	0	0
0	1269	1	0	1	57	20110719	1	1	0	1	0	1	0	0	0.3	0	0	1	1	1	1	0	1	0	0	7	0	0	0
0	1270	0	1	1	57	20110722	0	1	0	0	0	1	0	0	0.3	0	1	0	0	0	0	1	0	0	0	0	0	0	0
0	1271	1	0	0	21	20110726	0	0	0	0	0	2	0	0	0.3	0	1	0	0	1	0	1	0	0	0	0	0	0	0
0	1272	1	0	0	48	20110727	1	1	0	1	0	1	0	0	0.3	0	1	0	0	0	0	0	0	0	0	2	0	0	0
0	1273	1	0	0	40	20110802	1	1	0	0	0	1	0	0	0.3	0	1	0	0	1	0	1	1	1	1	7	0	0	0
0	1274	1	0	1	58	20110802	0	1	0	1	0	1	0	0	0.3	0	1	0	0	1	1	0	0	0	0	2	0	0	0
0	1275	1	0	1	61	20110808	0	1	0	0	0	2	0	0	0.3	0	1	0	0	0	0	0	0	0	0	7	0	0	0
0	1276	1	0	0	42	20110808	0	1	0	0	0	1	0	0	0.3	0	0	1	1	1	1	0	1	0	0	7	0	0	0
0	1277	1	0	0	46	20110810	1	1	0	0	1	0	0	0	0.3	0	1	0	0	1	0	0	0	0	0	3	0	0	0
0	1278	0	1	0	20	20110822	0	1	0	0	0	1	0	0	0.3	0	1	0	0	1	0	0	0	0	0	7	0	0	0
0	1279	1	0	0	38	20110824	1	1	0	0	1	0	0	0	0.3	1	0	1	2	1	0	1	1	1	10	18	0	0	0
0	1280	1	0	1	55	20110824	0	1	0	0	0	1	0	0	0.3	0	1	0	0	1	1	0	0	0	0	8	0	0	0
0	1281	1	0	0	34	20110825	0	1	0	0	1	0	0	0	0.3	0	1	0	0	1	0	0	1	0	0	8	0	0	0
0	1282	1	0	1	55	20110825	0	1	0	0	1	0	0	0	0.3	0	1	0	0	1	0	0	0	0	0	6	0	0	0
0	1283	1	0	0	37	20110826	0	1	0	0	0	2	0	0	0.3	0	1	0	0	1	0	0	1	0	0	2	0	0	0
0	1284	0	1	0	32	20110829	0	1	0	1	0	1	0	0	0.3	0	1	0	0	1	0	0	0	0	0	1	0	0	0
0	1285	1	0	0	50	20110830	1	1	0	1	0	1	0	0	0.3	0	1	0	0	1	1	0	0	0	0	1	0	0	0
0	1286	1	0	0	49	20110901	1	1	0	0	0	1	0	0	0.3	0	1	0	0	1	1	0	0	1	2	4	0	0	0
0	1287	1	0	0	40	20110901	1	1	0	0	0	1	0	0	0.3	0	1	0	0	0	1	0	1	0	0	7	0	0	0
0	1288	0	1	0	42	20110908	0	1	0	2	1	0	0	0	0.3	0	1	0	0	1	0	0	0	0	0	6	0	0	0
0	1289	1	0	1	55	20110914	0	1	0	0	0	2	0	0	0.3	0	1	0	0	1	1	0	1	0	0	8	0	0	0
0	1290	1	0	0	51	20110919	0	1	0	1	0	1	0	0	0.3	0	0	1	1	0	0	0	0	0	0	1	0	0	0
0	1291	1	0	0	51	20110919	0	1	0	0	0	1	0	0	0.3	0	1	0	0	1	1	0	0	0	0	5	0	0	0
0	1292	1	0	1	56	20110920	1	1	0	2	0	1	0	0	0.3	0	1	0	0	1	0	0	0	0	0	12	0	0	0
0	1293	1	0	0	24	20110922	0	1	0	0	0	1	0	0	0.3	0	1	0	0	1	0	0	0	0	0	0	0	0	0
0	1294	1	0	0	52	20110923	0	1	0	1	0	1	0	0	0.3	0	1	0	0	1	0	0	0	0	0	1	0	0	0
0	1295	0	1	0	28	20110926	1	1	0	0	0	1	0	0	0.3	0	1	0	0	1	1	0	0	1	2	2	0	0	0
0	1296	1	0	1	59	20110927	1	1	0	0	0	1	0	0	0.3	0	1	0	0	0	0	1	0	0	0	2	0	0	0
0	1297	0	1	0	53	20110927	1	1	0	1	0	1	0	0	0.3	0	1	0	0	1	0	1	0	1	2	2	0	0	0
0	1298	1	0	1	57	20110928	0	1	0	1	0	1	0	0	0.3	0	1	0	0	1	0	1	1	0	0	2	0	0	0
0	1299	1	0	0	39	20110929	0	1	0	0	1	0	0	0	0.3	0	1	0	0	1	0	0	0	0	0	2	0	0	0
0	1300	1	0	0	39	20110929	0	1	0	0	0	1	0	0	0.3	0	1	0	0	1	0	0	0	1	1	3	0	0	0
0	1301	1	0	0	46	20110930	0	1	0	0	0	1	0	0	0.3	0	1	0	0	1	0	0	1	0	0	6	0	0	0
0	1302	1	0	0	47	20111004	1	1	0	0	0	2	0	0	0.3	1	0	1	2	1	0	0	0	0	0	4	0	0	0
0	1303	1	0	0	40	20111012	0	1	0	0	0	1	0	0	0.3	0	1	0	0	1	0	0	1	0	0	6	0	0	0
0	1304	0	1	1	63	20111013	1	1	0	0	0	1	0	0	0.3	1	1	1	2	1	1	1	0	0	0	3	0	0	0
0	1305	1	0	0	49	20111024	1	1	0	2	0	1	0	0	0.3	0	1	0	0	1	0	0	1	1	1	12	0	0	0
0	1306	1	0	0	44	20111025	1	1	0	0	0	1	0	0	0.3	0	1	0	0	0	0	0	0	0	0	5	0	0	0
0	1307	1	0	0	32	20111028	0	1	0	1	0	2	0	0	0.3	0	1	0	0	0	0	0	1	0	0	2	0	0	0
0	1308	1	0	0	31	20111028	0	1	0	1	0	2	0	0	0.3	0	0	1	1	0	0	0	0	0	0	5	0	0	0
0	1309	0	1	0	40	20111031	0	1	0	1	1	0	0	0	0.3	0	1	0	0	1	0	0	0	1	1	3	0	0	0
0	1310	0	1	0	52	20111101	1	1	0	0	0	1	0	0	0.3	1	1	1	2	1	0	0	0	0	0	2	0	0	0
0	1311	0	1	1	58	20111103	0	1	0	1	0	2	0	0	0.3	0	1	0	0	1	1	0	0	0	0	0	0	0	0
0	1312	1	0	0	37	20111109	0	1	0	0	1	0	0	0	0.3	0	1	0	0	0	0	0	1	0	0	1	0	0	0
0	1313	1	0	0	48	20111110	1	1	0	0	1	0	0	0	0.3	0	0	1	1	1	0	0	1	0	0	15	0	0	0
0	1314	1	0	0	37	20111110	0	1	0	1	1	0	0	0	0.3	0	1	0	0	1	1	0	0	0	0	4	0	0	0
0	1315	1	0	1	58	20111115	1	1	0	0	0	1	0	0	0.3	0	1	0	0	1	0	0	1	0	0	3	0	0	0
0	1316	1	0	0	46	20111116	0	1	0	2	0	2	0	0	0.3	0	1	0	0	1	0	0	0	0	0	4	0	0	0
0	1317	1	0	0	42	20111121	0	1	0	1	0	1	0	0	0.3	0	1	0	0	1	0	0	1	0	0	9	0	0	0
0	1318	1	0	1	60	20111121	0	1	0	0	1	0	0	0	0.3	0	1	0	0	1	0	1	0	0	0	1	0	0	0
0	1319	1	0	0	33	20111122	0	1	0	0	0	1	0	0	0.3	0	1	0	0	0	0	0	1	0	0	17	0	0	0
0	1320	1	0	0	42	20111122	1	1	0	1	1	0	0	0	0.3	0	0	1	1	1	1	0	0	0	0	5	0	0	0
0	1321	1	0	0	34	20111123	1	1	0	1	0	2	0	0	0.3	0	1	0	0	1	0	1	0	1	2	6	0	0	0
0	1322	1	0	0	53	20111124	0	1	0	1	0	1	0	1	0.3	0	1	0	0	0	0	0	0	0	0	4	0	0	0
0	1323	1	0	0	46	20111124	1	1	0	2	1	0	0	0	0.3	1	0	1	2	1	1	0	1	0	0	7	0	0	0
0	1324	1	0	0	44	20111124	0	1	0	0	0	2	0	0	0.3	0	1	0	0	1	0	0	0	1	1	8	0	0	0
0	1325	1	0	0	46	20111128	0	1	0	0	1	0	0	0	0.3	0	1	0	0	1	0	0	0	0	0	6	0	0	0
1	1326	1	0	0	44	20111129	1	1	1	1	0	2	0	0	0.3	0	1	0	0	0	0	0	1	0	0	8	1	1	18
0	1327	1	0	0	36	20111129	0	1	0	1	0	1	0	0	0.3	0	1	0	0	0	0	0	0	0	0	0	0	0	0
0	1328	1	0	0	53	20111130	0	1	0	1	0	1	0	0	0.3	0	1	0	0	0	0	0	0	0	0	2	0	0	0
0	1329	1	0	1	56	20111205	0	1	0	1	0	1	0	0	0.3	0	1	0	0	1	0	1	0	0	0	1	0	0	0
0	1330	1	0	1	61	20111207	0	1	0	0	1	0	0	0	0.3	0	1	0	0	0	1	0	0	1	1	1	0	0	0
0	1331	1	0	0	41	20111207	0	1	0	0	0	1	0	0	0.3	0	0	1	1	1	1	1	0	0	0	1	0	0	0
0	1332	1	0	1	56	20111212	1	1	0	1	1	0	0	0	0.3	0	1	0	0	1	0	0	0	0	0	2	0	0	0
0	1333	1	0	1	59	20111214	1	1	0	0	1	0	0	0	0.3	0	1	0	0	1	1	0	1	0	0	4	0	0	0
0	1334	0	1	0	42	20111215	0	1	0	0	0	1	0	0	0.3	0	1	0	0	1	0	0	0	0	0	5	0	0	0
0	1335	1	0	0	52	20111215	1	1	0	0	1	0	0	0	0.3	0	1	0	0	1	0	0	1	0	0	12	0	0	0
0	1336	1	0	1	67	20111216	1	1	0	0	0	1	0	0	0.3	0	1	0	0	1	0	0	0	0	0	6	0	0	0
0	1337	1	0	0	48	20111220	1	1	0	1	0	1	0	0	0.3	0	1	0	0	1	0	0	0	0	0	7	0	0	0
0	1338	1	0	0	43	20111221	1	1	0	0	0	1	0	0	0.3	0	1	0	0	0	0	0	0	0	0	7	0	0	0
0	1339	1	0	0	53	20111221	1	1	0	0	1	0	0	0	0.3	0	1	0	0	1	0	0	0	1	2	9	0	0	0
1	1340	1	0	0	31	20111221	1	1	1	1	0	1	0	0	0.3	0	1	0	0	1	1	0	0	1	4	4	1	3	41
1	1341	1	0	0	53	20111223	1	1	1	1	0	1	0	0	0.3	0	1	0	0	1	1	1	1	1	4	10	1	4	30
0	1342	0	1	0	50	20111226	0	1	0	1	0	1	0	0	0.3	0	1	0	0	1	0	1	0	0	0	0	0	0	0
0	1343	1	0	0	34	20111226	0	1	0	1	0	2	0	0	0.3	0	1	0	0	1	0	1	0	0	0	3	0	0	0
0	1344	1	0	1	59	20111227	1	1	0	0	0	1	0	0	0.3	0	1	0	0	1	1	0	0	1	1	4	0	0	0
0	1345	0	1	0	44	20111227	0	1	0	1	1	0	0	0	0.3	0	1	0	0	0	0	0	0	1	1	3	0	0	0
0	1346	0	1	0	40	20111229	0	1	0	0	0	1	0	0	0.3	0	1	0	0	1	0	0	0	0	0	5	0	0	0
0	1347	0	1	0	17	20111229	0	1	0	0	0	2	0	0	0.3	0	1	0	0	0	0	0	0	0	0	4	0	0	0
0	1348	1	0	1	62	20111229	1	1	0	0	0	1	0	0	0.3	0	1	0	0	1	0	0	0	0	0	1	0	0	0
0	1349	1	0	0	38	20111230	1	1	0	1	1	0	0	0	0.3	0	1	0	0	1	0	0	0	0	0	1	0	0	0
0	1350	1	0	1	57	20111012	1	1	0	0	1	0	0	0	0.35	0	1	0	0	1	0	0	0	0	0	2	0	0	0
0	1351	1	0	0	47	20111025	1	1	0	0	0	1	0	0	0.35	0	1	0	0	1	1	0	1	0	0	4	0	0	0
0	1352	1	0	1	62	20110105	0	1	0	1	0	1	0	0	0.4	0	1	0	0	1	0	0	0	0	0	4	0	0	0
0	1353	1	0	0	38	20110106	0	1	0	1	0	1	0	0	0.4	0	1	0	0	1	0	1	0	0	0	5	0	0	0
0	1354	0	1	0	38	20110111	1	1	0	1	0	1	0	0	0.4	0	1	0	0	1	1	0	1	1	2	10	0	0	0
0	1355	1	0	0	47	20110111	1	1	0	1	1	0	0	0	0.4	0	1	0	0	1	0	0	1	0	0	16	0	0	0
0	1356	1	0	0	34	20110113	1	1	0	1	0	1	0	0	0.4	0	0	1	1	1	0	1	0	1	1	12	0	0	0
0	1357	1	0	0	48	20110117	0	1	0	0	0	2	0	0	0.4	0	1	0	0	1	1	0	0	0	0	2	0	0	0
0	1358	1	0	0	29	20110118	1	1	0	0	0	2	0	0	0.4	0	1	0	0	0	0	0	1	0	0	11	0	0	0
0	1359	1	0	0	38	20110120	0	1	0	0	1	0	0	0	0.4	0	1	0	0	1	0	0	0	0	0	3	0	0	0
0	1360	1	0	0	39	20110121	0	0	0	1	0	2	0	0	0.4	0	0	1	1	1	0	1	1	0	0	3	0	0	0
1	1361	1	0	0	37	20110121	1	1	1	0	0	1	0	0	0.4	0	1	0	0	1	0	0	0	1	1	1	1	4	45
0	1362	0	1	0	44	20110124	0	1	0	0	0	1	0	0	0.4	0	1	0	0	1	0	0	0	1	1	7	0	0	0
0	1363	1	0	0	34	20110127	1	1	0	1	0	1	0	0	0.4	0	1	0	0	0	0	0	1	0	0	5	0	0	0
0	1364	1	0	0	48	20110131	0	1	0	0	0	1	0	0	0.4	0	1	0	0	1	0	0	0	0	0	0	0	0	0
0	1365	1	0	0	41	20110207	1	1	0	0	0	2	0	0	0.4	0	1	0	0	1	0	0	1	0	0	12	0	0	0
0	1366	1	0	0	47	20110208	1	1	0	1	0	2	0	0	0.4	0	1	0	0	1	1	0	0	0	0	2	0	0	0
0	1367	1	0	0	30	20110208	0	0	0	0	1	0	0	0	0.4	0	1	0	0	1	0	0	0	1	4	4	0	0	0
0	1368	1	0	1	63	20110210	1	1	0	0	0	1	0	0	0.4	0	1	0	0	1	0	0	0	0	0	6	0	0	0
0	1369	1	0	0	35	20110210	1	1	0	0	0	1	0	0	0.4	0	1	0	0	1	0	0	0	1	2	3	0	0	0
0	1370	0	1	1	61	20110211	1	1	0	1	0	1	0	1	0.4	0	1	0	0	0	0	0	0	0	0	5	0	0	0
0	1371	1	0	0	30	20110211	0	1	0	1	0	1	0	1	0.4	0	1	0	0	0	0	0	1	0	0	1	0	0	0
0	1372	1	0	0	42	20110214	1	1	0	1	1	0	0	0	0.4	0	0	1	1	1	1	1	0	0	0	1	0	0	0
0	1373	1	0	0	41	20110214	0	1	0	1	0	1	0	0	0.4	0	1	0	0	1	0	0	0	0	0	5	0	0	0
0	1374	1	0	0	53	20110217	1	1	0	1	1	0	0	0	0.4	0	1	0	0	0	0	0	1	0	0	10	0	0	0
0	1375	1	0	0	45	20110221	0	1	0	0	0	2	0	0	0.4	0	1	0	0	1	0	0	0	0	0	1	0	0	0
0	1376	1	0	0	41	20110221	0	1	0	0	0	2	0	0	0.4	0	1	0	0	1	1	0	1	0	0	3	0	0	0
0	1377	1	0	0	50	20110221	0	1	0	0	1	0	0	0	0.4	0	1	0	0	1	1	0	1	0	0	9	0	0	1
0	1378	1	0	0	42	20110223	0	1	0	1	1	0	0	0	0.4	0	1	0	0	1	0	0	1	0	0	8	0	0	0
0	1379	0	1	0	37	20110303	1	1	0	0	0	1	0	0	0.4	0	1	0	0	0	0	1	0	1	2	2	0	0	0
0	1380	1	0	0	47	20110303	1	1	0	0	1	0	0	0	0.4	0	1	0	0	1	0	1	0	0	0	0	0	0	0
0	1381	1	0	0	50	20110303	0	0	0	0	0	2	0	0	0.4	0	1	0	0	1	1	0	1	0	0	0	0	0	0
0	1382	0	1	0	45	20110311	0	1	0	0	1	0	0	0	0.4	0	1	0	0	1	0	1	1	1	1	5	0	0	0
0	1383	0	1	1	55	20110311	0	1	0	0	1	0	0	0	0.4	0	1	0	0	0	0	0	0	0	0	0	0	0	0
0	1384	1	0	1	75	20110315	1	1	0	2	0	1	0	0	0.4	1	0	1	2	1	0	0	1	0	0	10	0	0	0
0	1385	1	0	0	37	20110316	0	1	0	0	0	1	0	0	0.4	0	1	0	0	0	0	0	0	0	0	3	0	0	0
0	1386	0	1	0	41	20110321	0	1	0	0	0	1	0	0	0.4	0	1	0	0	1	0	0	0	0	0	7	0	0	0
0	1387	1	0	0	41	20110321	0	1	0	1	0	2	0	0	0.4	0	1	0	0	0	0	0	0	0	0	0	0	0	0
0	1388	1	0	1	64	20110324	1	1	0	0	0	1	0	0	0.4	0	0	1	1	1	0	1	0	0	0	14	0	0	0
0	1389	1	0	0	41	20110328	1	1	0	0	0	1	0	0	0.4	0	1	0	0	1	0	0	0	1	3	3	0	0	0
0	1390	1	0	1	55	20110329	1	1	0	1	1	0	0	0	0.4	0	1	0	0	1	0	0	0	0	0	1	0	0	0
0	1391	1	0	1	64	20110330	1	1	0	1	0	2	0	0	0.4	0	0	1	1	1	0	0	0	0	0	7	0	0	0
0	1392	0	1	0	42	20110331	0	1	0	0	0	1	0	0	0.4	0	1	0	0	0	0	0	0	0	0	4	0	0	0
0	1393	1	0	0	37	20110331	0	1	0	0	0	1	0	0	0.4	0	1	0	0	1	0	1	1	0	0	5	0	0	0
0	1394	1	0	0	50	20110401	0	1	0	0	0	2	0	0	0.4	0	0	1	1	0	0	1	1	0	0	4	0	0	0
1	1395	0	1	0	41	20110401	1	1	1	1	1	0	0	0	0.4	0	1	0	0	0	1	0	1	1	5	12	1	10	43
0	1396	1	0	1	57	20110404	1	1	0	0	1	0	0	0	0.4	1	0	1	2	1	1	1	0	0	0	7	0	0	0
0	1397	1	0	0	45	20110407	1	1	0	0	0	1	0	0	0.4	0	1	0	0	1	0	0	0	0	0	0	0	0	0
0	1398	0	1	0	54	20110411	1	1	0	0	0	1	0	0	0.4	0	1	1	1	1	0	0	1	0	0	9	0	0	0
0	1399	1	0	0	42	20110413	1	1	0	0	0	1	0	0	0.4	1	0	1	2	0	1	0	1	1	7	7	0	0	0
0	1400	1	0	0	30	20110413	1	1	0	0	0	1	0	0	0.4	0	1	0	0	1	1	0	0	0	0	5	0	0	0
0	1401	1	0	0	44	20110428	0	1	0	1	0	1	0	0	0.4	0	0	1	1	0	0	0	1	0	0	7	0	0	0
1	1402	1	0	0	43	20110429	1	1	1	1	0	1	0	0	0.4	0	1	0	0	1	0	0	1	1	3	6	1	5	25
0	1403	0	1	0	26	20110504	1	1	0	1	0	1	0	0	0.4	0	1	0	0	1	0	0	0	1	3	3	0	0	0
0	1404	0	1	0	44	20110506	0	1	0	0	0	1	0	0	0.4	0	1	0	0	0	0	1	0	0	0	1	0	0	0
0	1405	1	0	0	47	20110511	0	1	0	1	0	1	0	0	0.4	0	1	0	0	1	0	0	0	0	0	3	0	0	0
0	1406	1	0	0	49	20110512	1	1	0	0	0	2	0	0	0.4	0	1	0	0	1	1	0	1	0	0	6	0	0	0
0	1407	0	1	0	44	20110512	1	1	0	0	0	1	0	0	0.4	0	1	1	1	1	0	0	1	0	0	12	0	0	0
0	1408	1	0	0	50	20110512	0	0	0	0	1	0	0	0	0.4	0	1	0	0	0	0	0	0	0	0	0	0	0	0
0	1409	0	1	1	64	20110513	0	1	0	0	1	0	0	0	0.4	0	1	0	0	0	0	0	0	1	1	1	0	0	0
0	1410	1	0	0	42	20110513	0	1	0	0	0	2	0	0	0.4	0	1	0	0	1	0	1	1	0	0	7	0	0	0
1	1411	1	0	0	41	20110513	1	1	1	0	1	0	0	0	0.4	0	1	0	0	1	1	1	0	1	1	7	1	3	32
0	1412	1	0	0	35	20110517	1	1	0	0	0	1	0	0	0.4	0	1	0	0	1	0	0	1	1	1	15	0	0	0
0	1413	1	0	0	44	20110519	0	1	0	1	0	1	0	0	0.4	0	1	0	0	1	0	0	0	0	0	7	0	0	0
0	1414	1	0	0	37	20110519	0	0	0	0	0	1	0	0	0.4	0	1	0	0	0	0	0	0	0	0	0	0	0	0
1	1415	1	0	1	58	20110524	1	1	1	1	1	0	0	0	0.4	1	0	1	2	1	0	0	1	0	0	6	1	3	27
0	1416	1	0	0	40	20110526	1	1	0	1	1	0	0	0	0.4	0	1	0	0	1	0	1	0	0	0	7	0	0	0
0	1417	1	0	0	48	20110526	1	1	1	1	0	2	0	0	0.4	0	1	0	0	1	1	0	0	0	0	6	0	0	8
0	1418	1	0	0	35	20110527	0	1	0	0	0	1	0	0	0.4	0	1	0	0	1	0	0	0	0	0	0	0	0	0
0	1419	1	0	0	37	20110530	0	1	0	0	0	2	0	0	0.4	0	1	0	0	1	0	0	0	0	0	0	0	0	0
0	1420	1	0	0	32	20110601	1	1	0	1	0	2	0	0	0.4	0	1	0	0	1	0	0	0	0	0	10	0	0	0
0	1421	1	0	0	32	20110602	1	1	0	1	0	1	0	0	0.4	0	1	0	0	1	0	0	0	1	1	1	0	0	0
0	1422	1	0	0	48	20110607	1	1	0	0	0	2	0	0	0.4	0	1	0	0	0	0	0	0	0	0	2	0	0	0
0	1423	1	0	1	66	20110608	0	1	0	0	0	1	0	0	0.4	0	1	0	0	1	0	0	0	0	0	1	0	0	0
0	1424	1	0	0	26	20110608	0	1	0	1	1	0	0	0	0.4	0	1	0	0	1	0	1	0	1	2	4	0	0	0
0	1425	1	0	1	56	20110609	0	1	0	0	1	0	0	0	0.4	0	1	0	0	1	0	0	0	0	0	3	0	0	0
0	1426	1	0	0	36	20110609	0	1	0	0	0	2	0	0	0.4	0	1	0	0	1	0	1	1	0	0	5	0	0	0
0	1427	1	0	0	52	20110609	1	1	0	0	0	2	0	0	0.4	0	1	0	0	0	0	1	1	0	0	4	0	0	0
0	1428	1	0	0	41	20110613	0	1	0	0	0	2	0	0	0.4	0	1	0	0	1	0	0	0	0	0	2	0	0	0
1	1429	0	1	1	56	20110615	1	1	1	0	1	0	0	0	0.4	0	1	0	0	1	0	0	0	1	4	5	1	6	32
0	1430	0	1	0	39	20110616	0	1	0	0	1	0	0	0	0.4	0	1	0	0	1	0	1	0	0	0	0	0	0	0
0	1431	1	0	0	44	20110617	1	1	0	0	0	1	0	0	0.4	0	0	1	1	1	1	1	1	0	0	6	0	0	0
0	1432	1	0	0	32	20110617	0	1	0	1	0	1	0	0	0.4	0	1	0	0	1	0	1	1	1	1	1	0	0	0
0	1433	1	0	0	47	20110620	0	1	0	1	1	0	0	0	0.4	0	0	1	1	1	1	0	0	0	0	2	0	0	0
0	1434	1	0	1	61	20110624	0	1	0	1	0	1	0	0	0.4	0	1	0	0	1	0	0	1	1	2	5	0	0	0
0	1435	1	0	0	39	20110627	0	1	0	0	0	1	0	0	0.4	0	0	1	1	1	0	0	1	1	4	9	0	0	0
0	1436	0	1	0	40	20110629	0	1	0	0	0	1	0	0	0.4	0	1	0	0	0	1	1	0	1	1	1	0	0	0
0	1437	1	0	0	38	20110629	0	1	0	0	0	2	0	0	0.4	0	0	1	1	0	0	1	0	0	0	1	0	0	0
0	1438	0	1	1	58	20110704	1	1	0	1	0	1	0	0	0.4	0	1	0	0	1	0	0	1	0	0	2	0	0	0
0	1439	1	0	0	50	20110706	0	1	0	1	1	0	0	0	0.4	0	1	0	0	1	1	1	0	0	0	0	0	0	0
0	1440	1	0	0	53	20110708	0	1	0	0	0	1	0	0	0.4	0	1	0	0	0	0	1	0	0	0	7	0	0	0
0	1441	1	0	0	33	20110708	1	1	0	0	0	1	0	0	0.4	0	1	0	0	1	0	0	1	0	0	6	0	0	0
0	1442	1	0	0	46	20110713	1	1	0	1	0	1	0	0	0.4	0	1	0	0	1	0	1	0	0	0	8	0	0	0
0	1443	0	1	0	47	20110713	1	1	0	1	0	2	0	0	0.4	0	1	1	1	1	0	0	1	1	1	7	0	0	0
0	1444	1	0	0	42	20110714	0	0	0	0	0	1	0	0	0.4	0	1	0	0	0	1	1	0	0	0	0	0	0	0
0	1445	0	1	0	54	20110714	1	1	0	0	0	1	0	0	0.4	0	1	0	0	1	1	0	0	1	1	6	0	0	0
0	1446	1	0	1	65	20110715	1	1	0	2	0	1	0	0	0.4	1	0	1	2	1	1	0	0	0	0	6	0	0	0
0	1447	1	0	0	35	20110715	0	1	0	1	0	1	0	0	0.4	0	1	0	0	1	0	0	0	0	0	2	0	0	0
0	1448	0	1	1	60	20110720	0	1	0	1	0	1	0	0	0.4	0	1	0	0	1	1	1	0	0	0	2	0	0	0
0	1449	1	0	1	56	20110720	1	1	0	0	0	1	0	0	0.4	0	1	0	0	1	1	0	0	0	0	3	0	0	0
0	1450	1	0	0	42	20110721	1	1	0	0	0	2	0	0	0.4	0	0	1	1	1	1	0	0	0	0	1	0	0	0
0	1451	1	0	1	59	20110721	0	1	0	1	0	1	0	2	0.4	0	1	0	0	1	0	1	0	0	0	8	0	0	0
0	1452	1	0	0	48	20110721	1	1	0	0	0	2	0	0	0.4	0	1	0	0	0	0	0	1	0	0	12	0	0	0
0	1453	1	0	0	33	20110722	0	1	0	0	0	1	0	0	0.4	0	1	0	0	1	1	0	1	0	0	6	0	0	0
0	1454	1	0	0	35	20110722	0	1	0	0	0	2	0	0	0.4	0	1	0	0	1	1	0	0	0	0	2	0	0	0
0	1455	1	0	1	64	20110726	1	1	0	0	0	1	0	0	0.4	0	1	0	0	0	0	1	1	0	0	9	0	0	0
0	1456	1	0	0	50	20110726	1	1	0	0	0	1	0	0	0.4	1	0	1	2	0	0	0	1	0	0	11	0	0	0
0	1457	1	0	0	36	20110726	1	1	0	0	1	0	0	0	0.4	0	1	0	0	1	1	1	1	0	0	6	0	0	0
0	1458	1	0	0	35	20110808	1	1	0	1	1	0	0	2	0.4	0	1	0	0	1	1	1	0	1	2	3	0	0	0
0	1459	1	0	0	36	20110808	0	1	0	2	0	1	0	0	0.4	0	1	0	0	1	1	0	1	0	0	11	0	0	0
0	1460	0	1	0	29	20110808	0	1	0	1	1	0	0	0	0.4	0	1	1	1	1	0	0	1	1	1	3	0	0	0
0	1461	1	0	0	31	20110809	1	1	0	0	0	2	0	0	0.4	0	1	0	0	0	0	0	1	1	1	8	0	0	0
1	1462	1	0	0	42	20110811	1	1	1	1	0	1	0	0	0.4	0	1	0	0	1	1	1	1	1	5	8	1	3	44
0	1463	0	1	1	60	20110817	0	1	0	0	0	1	0	0	0.4	0	1	0	0	1	0	0	0	0	0	1	0	0	0
0	1464	1	0	0	31	20110822	0	1	0	0	0	1	0	0	0.4	0	1	0	0	1	0	0	0	0	0	0	0	0	0
0	1465	1	0	0	46	20110826	0	1	0	0	0	1	0	0	0.4	0	1	0	0	1	0	0	0	0	0	1	0	0	0
0	1466	1	0	0	50	20110826	0	1	0	0	0	2	0	0	0.4	0	0	1	1	1	0	1	1	0	0	5	0	0	0
0	1467	1	0	0	46	20110829	0	1	0	1	0	1	0	0	0.4	0	1	0	0	1	0	0	0	0	0	0	0	0	0
0	1468	0	1	0	50	20110829	0	1	0	1	0	2	0	0	0.4	0	1	0	0	1	1	1	1	0	0	1	0	0	0
0	1469	0	1	0	53	20110829	1	1	0	1	0	1	0	0	0.4	0	1	0	0	0	0	0	0	1	1	9	0	0	0
0	1470	1	0	1	55	20110905	0	1	0	0	0	1	0	0	0.4	0	1	0	0	1	0	0	0	0	0	3	0	0	0
0	1471	1	0	0	30	20110907	0	1	0	1	0	2	0	0	0.4	0	1	0	0	0	0	0	0	0	0	0	0	0	0
0	1472	1	0	0	39	20110907	0	1	0	1	0	2	0	0	0.4	0	1	0	0	1	1	1	0	0	0	3	0	0	0
0	1473	1	0	1	56	20110908	1	1	0	0	1	0	0	0	0.4	1	0	1	2	1	1	1	0	1	1	3	0	0	0
0	1474	0	1	1	56	20110909	0	1	0	1	0	1	0	0	0.4	0	1	0	0	1	0	0	0	0	0	0	0	0	0
0	1475	1	0	0	52	20110914	1	1	0	0	1	0	0	0	0.4	0	0	1	1	0	0	0	0	0	0	3	0	0	0
0	1476	0	1	0	44	20110916	0	1	0	0	0	1	0	0	0.4	0	1	0	0	1	0	0	0	0	0	0	0	0	0
0	1477	1	0	0	39	20110916	0	1	0	1	0	1	0	0	0.4	0	1	0	0	1	1	0	0	1	1	6	0	0	0
0	1478	1	0	0	42	20110919	0	1	0	0	0	1	0	0	0.4	0	1	0	0	1	1	0	1	1	1	3	0	0	0
0	1479	1	0	0	40	20110921	0	1	0	0	1	0	0	0	0.4	0	1	0	0	1	0	0	0	0	0	6	0	0	0
0	1480	1	0	0	39	20110921	1	1	0	0	0	1	0	0	0.4	0	0	1	1	1	1	1	1	1	4	10	0	0	0
0	1481	1	0	0	26	20110923	0	1	0	0	0	1	0	0	0.4	0	1	0	0	0	0	0	0	0	0	9	0	0	0
0	1482	1	0	0	50	20110923	1	1	0	1	0	1	0	0	0.4	0	1	0	0	1	0	1	0	0	0	1	0	0	0
0	1483	0	1	0	47	20110926	0	1	0	1	0	2	0	0	0.4	0	1	1	1	1	0	0	0	0	0	3	0	0	0
0	1484	1	0	1	56	20110926	0	1	0	0	0	2	0	0	0.4	0	0	1	1	1	0	0	1	0	0	4	0	0	0
0	1485	1	0	0	53	20110929	1	1	0	1	0	1	0	0	0.4	0	1	0	0	1	0	0	0	0	0	6	0	0	0
0	1486	1	0	0	42	20110929	1	1	0	0	0	2	0	0	0.4	0	1	0	0	1	1	1	0	1	2	5	0	0	0
0	1487	1	0	0	52	20110930	0	1	0	0	0	1	0	0	0.4	0	1	0	0	1	0	0	1	0	0	4	0	0	0
0	1488	1	0	0	37	20111005	0	1	0	0	0	2	0	0	0.4	0	1	0	0	1	0	0	1	0	0	11	0	0	0
0	1489	1	0	0	48	20111005	1	1	0	0	1	0	0	0	0.4	1	0	1	2	1	0	0	0	0	0	1	0	0	0
0	1490	1	0	0	54	20111006	1	1	0	0	1	0	0	0	0.4	0	1	0	0	1	1	0	0	0	0	3	0	0	0
0	1491	1	0	0	28	20111006	0	1	0	0	0	2	0	0	0.4	0	1	0	0	1	1	0	0	0	0	1	0	0	0
0	1492	1	0	0	36	20111007	0	1	0	0	0	1	0	0	0.4	0	1	0	0	1	0	0	0	0	0	3	0	0	0
0	1493	1	0	0	35	20111007	0	1	0	0	0	1	0	0	0.4	0	1	0	0	1	0	0	0	0	0	2	0	0	0
0	1494	1	0	1	75	20111017	0	1	0	1	0	1	0	0	0.4	0	1	0	0	1	0	0	1	0	0	4	0	0	0
0	1495	1	0	0	39	20111021	1	1	0	0	0	1	0	0	0.4	1	0	1	2	1	0	0	0	0	0	1	0	0	0
0	1496	0	1	0	45	20111026	0	1	0	0	0	2	0	0	0.4	0	1	0	0	1	0	0	0	0	0	3	0	0	0
0	1497	1	0	0	35	20111031	1	1	0	0	1	0	0	0	0.4	0	1	0	0	0	0	1	0	0	0	2	0	0	0
0	1498	1	0	0	28	20111107	1	1	0	1	0	2	0	0	0.4	1	0	1	2	1	0	0	1	1	4	8	0	0	0
0	1499	1	0	0	30	20111107	0	1	0	0	0	2	0	0	0.4	0	1	0	0	1	0	0	1	0	0	8	0	0	0
0	1500	0	1	0	50	20111108	1	1	0	1	0	1	0	0	0.4	0	1	0	0	1	0	0	0	0	0	4	0	0	0
0	1501	1	0	0	42	20111108	1	1	0	0	0	1	0	0	0.4	0	0	1	1	1	0	0	1	1	1	7	0	0	0
0	1502	1	0	0	29	20111110	0	0	0	1	0	2	0	0	0.4	0	1	0	0	1	0	1	1	0	0	0	0	0	0
0	1503	1	0	0	47	20111111	0	1	0	0	0	2	0	0	0.4	0	1	0	0	1	1	1	0	1	1	1	0	0	0
0	1504	1	0	1	59	20111111	0	1	0	1	0	1	0	0	0.4	0	1	0	0	0	1	0	0	0	0	6	0	0	0
0	1505	1	0	0	48	20111114	0	1	0	0	1	0	0	0	0.4	0	1	0	0	1	0	1	0	0	0	1	0	0	0
0	1506	1	0	0	34	20111114	0	1	0	0	1	0	0	0	0.4	0	1	0	0	1	0	0	1	0	0	10	0	0	0
0	1507	1	0	0	49	20111115	0	1	0	1	1	0	0	0	0.4	0	1	0	0	1	1	0	1	0	0	7	0	0	0
0	1508	1	0	0	28	20111117	1	1	0	1	0	2	0	0	0.4	0	1	0	0	1	1	0	0	0	0	5	0	0	0
0	1509	0	1	0	38	20111117	0	1	0	1	0	1	0	0	0.4	0	1	0	0	1	0	0	0	0	0	6	0	0	0
0	1510	1	0	0	53	20111118	0	1	0	0	0	1	0	1	0.4	0	1	0	0	0	0	0	0	0	0	0	0	0	0
0	1511	0	1	0	41	20111122	0	1	0	1	0	1	0	0	0.4	0	1	0	0	1	1	0	0	0	0	2	0	0	0
0	1512	1	0	0	50	20111123	1	1	0	0	0	2	0	0	0.4	0	1	0	0	0	1	0	1	0	0	13	0	0	0
0	1513	0	1	0	32	20111124	1	1	0	0	1	0	0	0	0.4	1	1	1	2	1	0	0	0	0	0	0	0	0	0
0	1514	1	0	0	49	20111129	1	1	0	0	0	1	0	0	0.4	0	1	0	0	1	1	0	1	0	0	14	0	0	0
0	1515	1	0	1	59	20111201	1	1	0	1	1	0	0	0	0.4	0	1	0	0	1	1	0	0	0	0	6	0	0	0
0	1516	1	0	0	47	20111201	1	1	0	0	0	2	0	0	0.4	0	1	0	0	1	0	0	1	1	4	17	0	0	0
0	1517	1	0	1	56	20111202	1	1	0	0	1	0	0	0	0.4	0	1	0	0	1	1	0	1	0	0	4	0	0	0
0	1518	1	0	0	43	20111205	1	1	0	1	1	0	0	0	0.4	1	0	1	2	1	1	0	1	0	0	7	0	0	0
0	1519	1	0	0	53	20111206	1	1	0	1	0	1	0	0	0.4	1	0	1	2	1	1	0	0	0	0	1	0	0	0
0	1520	1	0	0	40	20111208	0	1	0	0	1	0	0	0	0.4	0	1	0	0	1	0	0	1	1	1	4	0	0	0
0	1521	1	0	1	67	20111208	0	1	0	0	0	2	0	0	0.4	0	1	0	0	1	0	0	1	0	0	2	0	0	0
0	1522	1	0	0	54	20111209	0	1	0	0	0	1	0	0	0.4	0	1	0	0	1	0	0	0	0	0	0	0	0	0
0	1523	1	0	0	33	20111209	0	1	0	1	0	1	0	0	0.4	0	1	0	0	1	0	0	1	0	0	4	0	0	0
1	1524	0	1	0	34	20111212	1	1	1	1	0	2	0	0	0.4	0	1	0	0	1	1	0	0	0	0	2	1	1	43
0	1525	1	0	0	52	20111213	1	1	0	1	0	2	0	0	0.4	1	0	1	2	1	0	0	0	0	0	2	0	0	0
1	1526	1	0	0	38	20111213	1	1	2	0	0	1	0	2	0.4	1	0	1	2	1	0	1	1	1	13	16	1	20	53
0	1527	1	0	0	49	20111214	0	1	0	0	0	2	0	0	0.4	0	1	0	0	1	0	0	1	0	0	8	0	0	0
0	1528	1	0	0	51	20111219	0	1	0	1	0	1	0	0	0.4	0	1	0	0	1	0	0	1	0	0	3	0	0	0
0	1529	1	0	0	39	20111222	0	1	0	1	0	1	0	0	0.4	0	1	0	0	1	0	0	1	0	0	0	0	0	0
1	1530	0	1	0	39	20111223	1	1	1	1	1	0	0	0	0.4	0	1	0	0	1	0	1	0	0	0	3	1	1	36
0	1531	1	0	0	40	20111227	0	1	0	0	1	0	0	0	0.4	0	1	0	0	1	0	1	0	1	1	1	0	0	0
0	1532	1	0	0	45	20111228	0	1	0	0	0	1	0	0	0.4	0	1	0	0	1	1	0	0	0	0	5	0	0	0
0	1533	1	0	0	48	20110103	1	1	0	0	0	1	0	0	0.5	0	1	0	0	1	1	0	0	1	1	5	0	0	0
0	1534	0	1	0	36	20110103	1	1	0	1	1	0	0	0	0.5	0	1	0	0	1	1	1	0	1	9	11	0	0	0
0	1535	1	0	0	32	20110104	0	1	0	1	1	0	0	0	0.5	0	1	0	0	1	0	1	0	1	2	2	0	0	0
0	1536	1	0	0	47	20110104	0	1	1	1	0	1	0	0	0.5	0	1	0	0	1	1	0	0	0	0	5	0	0	2
0	1537	1	0	0	43	20110106	0	1	0	1	1	0	0	0	0.5	0	1	0	0	1	1	1	1	1	2	5	0	0	0
0	1538	0	1	0	51	20110106	1	1	0	1	0	1	0	0	0.5	0	1	0	0	1	1	1	0	0	0	0	0	0	0
0	1539	1	0	0	46	20110107	1	1	0	1	0	1	0	0	0.5	0	1	0	0	1	1	0	0	1	2	7	0	0	0
0	1540	1	0	0	40	20110111	0	1	0	0	0	2	0	0	0.5	0	1	0	0	1	0	0	0	0	0	0	0	0	0
0	1541	0	1	0	25	20110113	1	1	0	0	0	1	0	0	0.5	0	1	1	1	0	0	1	0	0	0	3	0	0	1
0	1542	1	0	0	36	20110113	1	1	0	1	0	1	0	0	0.5	0	1	0	0	1	0	0	0	1	1	8	0	0	0
1	1543	0	1	0	35	20110113	1	1	1	0	0	1	0	0	0.5	0	1	0	0	1	0	0	0	0	0	3	1	1	41
0	1544	1	0	0	44	20110114	1	1	0	1	1	0	0	0	0.5	0	1	0	0	1	1	0	1	0	0	4	0	0	0
0	1545	1	0	0	42	20110118	0	1	0	1	0	1	0	0	0.5	0	1	0	0	1	1	0	0	1	1	3	0	0	0
0	1546	1	0	0	47	20110121	1	1	0	0	0	1	0	0	0.5	0	1	0	0	1	1	1	1	1	5	5	0	0	0
0	1547	1	0	0	39	20110124	0	1	0	0	0	1	0	0	0.5	0	1	0	0	1	1	0	0	0	0	1	0	0	0
0	1548	1	0	0	48	20110126	1	1	0	0	1	0	0	0	0.5	0	1	0	0	1	1	0	0	1	1	2	0	0	0
0	1549	1	0	0	35	20110127	1	1	0	1	1	0	0	0	0.5	0	1	0	0	1	0	1	0	0	0	5	0	0	0
0	1550	0	1	1	57	20110128	0	1	0	1	0	1	0	0	0.5	0	1	1	1	1	1	0	0	0	0	1	0	0	0
0	1551	1	0	1	58	20110128	0	1	0	1	0	1	0	0	0.5	0	1	0	0	0	0	0	0	0	0	1	0	0	0
0	1552	1	0	0	43	20110128	0	1	0	1	0	1	0	8	0.5	0	1	0	0	0	0	0	1	0	0	1	0	0	0
0	1553	1	0	1	57	20110131	0	1	0	1	0	1	0	0	0.5	0	1	0	0	0	0	0	0	0	0	0	0	0	0
0	1554	1	0	0	35	20110131	0	1	0	1	0	1	0	0	0.5	0	1	0	0	0	0	1	0	1	1	5	0	0	0
0	1555	1	0	0	52	20110207	1	1	0	0	0	2	0	0	0.5	0	1	0	0	1	0	1	0	1	4	8	0	0	0
0	1556	1	0	0	44	20110207	1	1	0	2	0	1	0	0	0.5	0	1	0	0	1	1	0	1	0	0	6	0	0	0
0	1557	1	0	0	29	20110207	0	1	0	1	0	1	0	0	0.5	0	1	0	0	1	0	1	0	0	0	1	0	0	0
0	1558	0	1	1	56	20110208	0	1	0	1	0	1	0	0	0.5	0	1	0	0	1	0	0	0	1	1	3	0	0	0
0	1559	1	0	0	31	20110208	1	1	0	0	0	1	0	0	0.5	0	0	1	1	1	0	0	1	0	0	3	0	0	0
0	1560	1	0	0	49	20110208	1	1	0	1	0	1	0	0	0.5	0	1	0	0	1	0	1	1	0	0	4	0	0	0
0	1561	1	0	0	51	20110209	0	1	0	1	0	1	0	0	0.5	0	1	0	0	1	0	0	1	0	0	11	0	0	0
0	1562	1	0	0	41	20110209	0	1	0	0	0	1	0	0	0.5	0	0	1	1	0	0	0	0	0	0	7	0	0	0
0	1563	1	0	0	39	20110210	0	0	0	0	0	1	0	0	0.5	0	1	0	0	0	0	0	0	0	0	7	0	0	0
0	1564	1	0	0	54	20110210	1	1	0	1	0	2	0	0	0.5	0	1	0	0	1	0	0	1	0	0	9	0	0	0
0	1565	1	0	0	54	20110211	0	1	0	0	0	1	0	0	0.5	0	1	0	0	1	0	0	0	1	1	8	0	0	0
0	1566	1	0	1	57	20110215	1	1	0	1	0	1	0	0	0.5	0	1	0	0	1	0	1	1	0	0	8	0	0	0
0	1567	0	1	1	58	20110215	1	1	0	0	0	2	0	0	0.5	0	1	1	1	1	1	0	0	1	5	5	0	0	0
0	1568	1	0	1	57	20110215	1	1	0	0	0	1	0	0	0.5	0	1	0	0	1	1	1	0	1	1	7	0	0	0
0	1569	1	0	0	45	20110215	1	1	0	0	0	1	0	0	0.5	0	1	0	0	1	0	0	0	0	0	4	0	0	0
0	1570	0	1	1	57	20110216	1	1	0	0	1	0	0	0	0.5	0	1	1	1	1	1	1	1	0	0	0	0	0	0
1	1571	1	0	0	38	20110216	1	1	1	0	0	2	0	2	0.5	0	0	1	1	1	1	1	1	1	5	12	1	7	17
0	1572	1	0	0	49	20110217	0	1	0	1	1	0	0	0	0.5	0	1	0	0	0	1	1	0	0	0	9	0	0	0
0	1573	1	0	0	46	20110217	0	1	0	0	0	1	0	0	0.5	0	1	0	0	0	1	0	0	0	0	6	0	0	0
0	1574	1	0	1	72	20110218	1	1	0	0	0	1	0	0	0.5	0	1	0	0	1	0	0	1	0	0	8	0	0	0
0	1575	1	0	0	43	20110218	0	1	0	1	0	1	0	0	0.5	0	1	0	0	1	0	0	1	0	0	10	0	0	0
0	1576	1	0	0	52	20110221	0	1	0	1	0	1	0	0	0.5	0	1	0	0	1	1	1	1	0	0	3	0	0	0
1	1577	1	0	0	38	20110221	1	1	1	1	0	1	0	0	0.5	0	1	0	0	1	1	0	0	1	2	2	1	1	24
0	1578	1	0	0	45	20110221	0	0	0	0	0	1	0	0	0.5	0	1	0	0	1	0	0	0	0	0	0	0	0	0
0	1579	1	0	0	43	20110221	1	1	0	0	0	2	0	0	0.5	0	1	0	0	1	1	1	1	0	0	2	0	0	0
0	1580	0	1	0	39	20110221	0	1	0	0	0	2	0	0	0.5	0	1	0	0	1	1	1	0	1	3	9	0	0	0
1	1581	1	0	0	41	20110222	1	1	1	1	1	0	0	0	0.5	0	1	0	0	1	0	0	0	1	1	7	1	6	32
0	1582	0	1	0	49	20110222	1	1	0	1	1	0	0	0	0.5	0	1	0	0	1	1	0	0	1	1	1	0	0	0
0	1583	1	0	0	37	20110223	0	1	0	1	0	1	0	0	0.5	0	1	0	0	1	0	0	0	0	0	0	0	0	0
0	1584	0	1	0	44	20110223	0	1	0	0	0	2	0	0	0.5	0	1	0	0	0	0	0	0	0	0	6	0	0	0
0	1585	0	1	0	44	20110224	0	1	0	1	1	0	0	0	0.5	0	1	1	1	1	1	0	0	0	0	2	0	0	0
0	1586	1	0	0	51	20110224	1	1	0	0	0	2	0	0	0.5	0	1	0	0	1	0	0	0	1	1	2	0	0	0
0	1587	1	0	1	58	20110302	1	1	0	1	0	2	0	0	0.5	0	1	0	0	0	0	0	1	0	0	7	0	0	0
0	1588	1	0	0	52	20110302	1	1	0	1	0	1	0	0	0.5	1	0	1	2	1	1	1	0	0	0	4	0	0	0
0	1589	1	0	1	56	20110303	0	1	0	0	0	1	0	0	0.5	0	1	0	0	0	0	0	0	0	0	6	0	0	0
0	1590	0	1	0	33	20110303	0	1	0	1	0	1	0	0	0.5	0	1	0	0	0	0	0	0	0	0	0	0	0	0
0	1591	1	0	0	39	20110303	1	1	0	0	0	1	0	0	0.5	1	0	1	2	1	0	0	0	0	0	0	0	0	4
0	1592	0	1	0	44	20110303	1	1	0	0	0	2	0	0	0.5	1	1	1	2	1	0	0	0	1	2	3	0	0	0
0	1593	1	0	0	44	20110304	0	1	0	1	1	0	0	0	0.5	0	1	0	0	0	0	0	0	0	0	0	0	0	0
0	1594	1	0	0	49	20110309	0	1	0	0	0	2	0	0	0.5	0	1	0	0	0	0	0	1	0	0	3	0	0	0
0	1595	1	0	0	41	20110310	1	1	0	1	1	0	0	0	0.5	0	1	0	0	0	1	1	0	1	2	4	0	0	0
0	1596	1	0	0	50	20110310	1	1	0	0	0	1	0	0	0.5	0	0	1	1	1	1	0	0	0	0	2	0	0	0
0	1597	0	1	0	41	20110310	0	1	0	1	1	0	0	0	0.5	0	1	0	0	0	0	1	0	0	0	2	0	0	0
0	1598	0	1	1	62	20110311	1	1	0	1	1	0	0	0	0.5	0	1	0	0	0	0	1	0	0	0	3	0	0	0
0	1599	1	0	0	53	20110314	0	1	0	1	0	1	0	0	0.5	0	1	0	0	1	1	0	0	0	0	1	0	0	0
0	1600	0	1	1	64	20110315	1	1	0	0	0	1	0	0	0.5	0	1	0	0	1	0	0	0	0	0	4	0	0	0
0	1601	1	0	0	43	20110315	1	1	0	2	0	1	0	0	0.5	0	1	0	0	1	1	1	0	1	4	8	0	0	0
0	1602	0	1	1	56	20110317	1	1	0	0	0	1	0	0	0.5	0	1	0	0	0	0	0	0	0	0	4	0	0	0
0	1603	1	0	0	51	20110317	1	1	0	1	0	2	0	0	0.5	1	0	1	2	1	1	0	0	0	0	3	0	0	0
0	1604	1	0	1	63	20110321	1	1	0	0	0	2	0	0	0.5	0	1	0	0	1	1	0	1	0	0	6	0	0	0
0	1605	1	0	1	55	20110321	1	1	0	1	0	2	0	0	0.5	1	0	1	2	1	1	0	0	1	2	9	0	0	0
0	1606	1	0	0	39	20110322	1	1	0	1	1	0	0	0	0.5	0	1	0	0	1	1	0	0	0	0	0	0	0	0
0	1607	0	1	0	43	20110323	0	1	0	1	0	2	0	0	0.5	0	1	0	0	1	0	0	0	0	0	2	0	0	0
0	1608	1	0	1	59	20110324	1	1	0	0	0	2	0	0	0.5	0	1	0	0	0	1	0	0	0	0	3	0	0	0
0	1609	1	0	0	47	20110325	0	1	0	0	1	0	0	0	0.5	0	1	0	0	1	0	1	0	0	0	2	0	0	0
0	1610	1	0	1	67	20110328	1	1	0	1	0	2	0	0	0.5	0	1	0	0	1	0	0	1	0	0	2	0	0	0
0	1611	1	0	1	60	20110328	0	1	0	0	0	1	0	0	0.5	0	1	0	0	1	0	0	0	0	0	0	0	0	0
0	1612	1	0	0	23	20110328	0	1	0	0	0	2	0	0	0.5	0	1	0	0	1	0	0	1	1	4	9	0	0	0
0	1613	1	0	0	47	20110329	1	1	0	1	1	0	0	0	0.5	0	1	0	0	1	1	1	1	1	1	9	0	0	0
1	1614	1	0	0	33	20110330	1	1	1,4	0	1	0	0	0	0.5	1	0	1	2	1	1	0	0	0	0	1	1	2	54
1	1615	1	0	1	62	20110404	1	1	1	0	1	0	0	0	0.5	0	1	0	0	1	1	0	1	1	3	6	1	8	47
0	1616	0	1	0	50	20110404	0	1	0	0	0	1	0	0	0.5	0	1	0	0	1	1	0	0	0	0	5	0	0	0
0	1617	1	0	0	49	20110405	0	1	0	1	1	0	0	0	0.5	1	0	1	2	1	1	0	0	1	2	5	0	0	0
0	1618	1	0	0	40	20110405	1	1	0	0	0	1	0	0	0.5	0	0	1	1	1	1	0	1	1	2	7	0	0	0
0	1619	1	0	0	43	20110406	1	1	0	1	0	1	0	0	0.5	0	1	0	0	1	1	1	0	0	0	1	0	0	0
0	1620	0	1	0	48	20110407	1	1	0	0	0	1	0	0	0.5	1	1	1	2	1	1	0	0	0	0	0	0	0	0
0	1621	1	0	0	41	20110407	0	1	0	1	0	1	0	0	0.5	0	1	0	0	1	0	0	1	0	0	4	0	0	0
0	1622	1	0	0	53	20110408	1	1	0	0	0	2	0	0	0.5	1	0	1	2	1	1	0	0	0	0	4	0	0	0
0	1623	1	0	0	41	20110412	1	1	0	1	0	2	0	0	0.5	0	1	0	0	1	0	0	1	1	1	3	0	0	0
0	1624	1	0	1	59	20110413	1	1	0	0	0	2	0	0	0.5	1	0	1	2	1	1	0	0	0	0	0	0	0	0
0	1625	0	1	0	47	20110413	0	1	0	1	0	1	0	0	0.5	0	1	0	0	1	0	0	0	0	0	3	0	0	0
0	1626	1	0	0	41	20110414	1	1	0	0	1	0	0	0	0.5	1	0	1	2	1	0	0	0	1	1	3	0	0	0
0	1627	1	0	0	47	20110415	0	1	0	1	0	1	0	0	0.5	0	1	0	0	1	0	0	1	0	0	0	0	0	0
0	1628	1	0	0	45	20110415	1	1	0	1	0	2	0	0	0.5	0	0	1	1	1	0	1	0	1	1	2	0	0	0
0	1629	1	0	0	46	20110415	0	1	0	1	1	0	0	0	0.5	0	0	1	1	1	0	1	1	0	0	0	0	0	0
0	1630	1	0	0	35	20110419	0	1	0	0	0	1	0	0	0.5	0	0	1	1	1	1	0	1	0	0	0	0	0	0
0	1631	1	0	0	39	20110419	0	1	0	1	1	0	0	0	0.5	0	1	0	0	1	0	0	0	0	0	0	0	0	0
0	1632	0	1	0	48	20110422	1	1	0	0	1	0	0	0	0.5	0	1	1	1	1	1	1	0	1	1	12	0	0	0
0	1633	1	0	0	26	20110425	0	1	0	0	0	2	0	0	0.5	0	1	0	0	0	0	1	0	0	0	2	0	0	0
0	1634	1	0	0	38	20110425	0	1	0	1	1	0	0	0	0.5	0	0	1	1	1	0	0	1	1	3	14	0	0	0
0	1635	1	0	1	55	20110426	0	1	0	0	0	2	0	0	0.5	0	1	0	0	0	0	1	1	0	0	0	0	0	0
0	1636	1	0	0	49	20110426	1	1	0	0	0	1	0	0	0.5	1	0	1	2	1	1	0	0	0	0	0	0	0	0
0	1637	1	0	0	31	20110426	0	1	0	0	0	2	0	0	0.5	0	1	0	0	1	0	1	0	1	2	7	0	0	0
0	1638	1	0	0	53	20110427	1	1	0	2	0	2	0	0	0.5	0	1	0	0	1	1	0	1	1	2	9	0	0	0
0	1639	0	1	0	39	20110429	0	1	0	1	0	1	0	0	0.5	0	1	0	0	0	0	0	0	0	0	0	0	0	0
0	1640	1	0	0	52	20110502	0	0	0	1	0	2	0	0	0.5	0	1	0	0	1	0	0	1	0	0	3	0	0	0
0	1641	1	0	0	32	20110503	0	1	0	0	0	1	0	0	0.5	0	1	0	0	1	0	0	0	0	0	4	0	0	0
0	1642	1	0	0	35	20110503	0	0	0	1	0	1	0	5	0.5	0	1	0	0	0	0	0	1	0	0	15	0	0	0
0	1643	1	0	0	41	20110504	0	1	0	0	1	0	0	0	0.5	0	1	0	0	1	1	0	0	0	0	12	0	0	0
0	1644	1	0	1	62	20110506	0	1	0	1	0	1	0	0	0.5	0	1	0	0	1	1	0	0	0	0	1	0	0	0
0	1645	1	0	0	52	20110511	1	1	0	0	0	1	0	0	0.5	0	0	1	1	1	0	1	0	0	0	3	0	0	0
0	1646	0	1	1	56	20110511	0	1	0	0	0	2	0	0	0.5	0	1	0	0	0	0	0	0	0	0	3	0	0	0
0	1647	1	0	0	43	20110512	0	0	0	1	0	1	0	0	0.5	0	1	0	0	1	0	0	0	0	0	0	0	0	0
0	1648	1	0	0	54	20110512	1	1	0	1	0	2	0	0	0.5	0	1	0	0	0	0	0	0	0	0	1	0	0	0
0	1649	1	0	0	35	20110516	0	1	0	1	0	1	0	0	0.5	0	1	0	0	1	1	0	0	0	0	0	0	0	0
0	1650	1	0	0	49	20110518	1	1	0	2	1	0	0	1	0.5	0	1	0	0	0	0	0	1	0	0	5	0	0	0
0	1651	0	1	0	34	20110519	1	1	0	0	0	1	0	0	0.5	0	1	0	0	1	0	0	0	0	0	3	0	0	0
0	1652	0	1	1	61	20110520	0	1	0	1	1	0	0	0	0.5	0	1	0	0	1	0	0	0	0	0	1	0	0	0
0	1653	0	1	0	30	20110520	0	1	0	0	0	1	0	0	0.5	0	1	0	0	1	1	0	0	1	1	4	0	0	0
0	1654	1	0	0	50	20110523	0	1	0	1	0	2	0	0	0.5	0	0	1	1	1	0	0	1	0	0	11	0	0	0
0	1655	1	0	0	37	20110524	1	1	0	0	0	1	0	0	0.5	0	1	0	0	1	0	1	1	0	0	3	0	0	0
0	1656	1	0	0	35	20110526	0	1	0	1	0	1	0	0	0.5	0	1	0	0	1	0	0	0	0	0	0	0	0	0
0	1657	0	1	0	40	20110526	1	1	0	1	0	1	0	0	0.5	0	1	0	0	1	0	0	0	0	0	8	0	0	0
0	1658	1	0	0	44	20110526	0	1	0	0	1	0	0	0	0.5	0	1	0	0	0	0	0	0	0	0	2	0	0	0
0	1659	1	0	0	53	20110527	0	1	0	0	0	1	0	0	0.5	0	1	0	0	1	0	0	0	0	0	2	0	0	0
0	1660	1	0	0	41	20110527	1	1	0	1	1	0	0	1	0.5	0	1	0	0	0	0	0	1	0	0	3	0	0	0
0	1661	1	0	1	70	20110527	1	1	0	0	0	1	0	0	0.5	0	1	0	0	0	0	0	1	0	0	10	0	0	0
0	1662	1	0	0	50	20110527	1	1	0	0	0	1	0	0	0.5	0	0	1	1	1	1	1	1	1	1	7	0	0	0
0	1663	1	0	0	35	20110530	1	1	0	0	0	2	0	0	0.5	0	1	0	0	1	0	0	1	1	1	9	0	0	0
0	1664	1	0	0	42	20110530	0	1	0	1	0	1	0	0	0.5	0	1	0	0	1	1	0	1	0	0	4	0	0	0
0	1665	1	0	0	38	20110530	0	1	0	0	0	1	0	0	0.5	0	1	0	0	1	0	1	0	0	0	7	0	0	0
0	1666	1	0	0	32	20110530	0	1	0	0	0	1	0	0	0.5	0	1	0	0	0	1	0	1	1	1	11	0	0	0
0	1667	1	0	0	54	20110531	0	1	0	0	0	2	0	0	0.5	0	1	0	0	1	0	0	1	0	0	0	0	0	0
0	1668	1	0	0	46	20110531	1	1	0	0	0	1	0	0	0.5	0	1	0	0	0	1	0	0	1	2	5	0	0	0
1	1669	1	0	0	41	20110531	1	1	1	1	1	0	0	0	0.5	0	1	0	0	1	0	1	0	1	1	3	1	8	34
0	1670	1	0	0	36	20110601	1	1	0	0	0	2	0	0	0.5	0	1	0	0	1	0	1	0	1	1	1	0	0	0
0	1671	1	0	0	48	20110607	0	1	1	1	0	1	0	0	0.5	0	1	0	0	1	0	0	1	0	0	7	0	0	4
0	1672	1	0	0	54	20110608	1	1	0	1	0	2	0	0	0.5	0	1	0	0	1	1	0	0	0	0	2	0	0	0
0	1673	1	0	0	32	20110609	1	1	0	0	1	0	0	0	0.5	0	1	0	0	1	1	0	0	0	0	9	0	0	0
0	1674	0	1	0	26	20110609	0	1	0	1	0	1	0	0	0.5	0	1	0	0	1	0	1	0	0	0	1	0	0	0
0	1675	1	0	0	42	20110610	0	1	0	1	0	1	0	0	0.5	0	0	1	1	1	0	1	0	1	1	8	0	0	0
0	1676	1	0	1	57	20110613	0	1	0	1	1	0	0	0	0.5	0	1	0	0	1	1	0	1	0	0	4	0	0	0
0	1677	1	0	0	49	20110615	1	1	0	1	0	2	0	0	0.5	0	1	0	0	1	0	0	0	0	0	5	0	0	0
0	1678	1	0	1	56	20110616	1	1	0	0	1	0	0	0	0.5	0	1	0	0	1	0	0	1	0	0	7	0	0	0
0	1679	1	0	1	61	20110616	1	1	0	1	1	0	0	1	0.5	0	1	0	0	1	0	0	0	1	1	2	0	0	0
0	1680	1	0	0	35	20110617	1	1	0	0	0	1	0	2	0.5	0	0	1	1	1	0	1	0	1	1	4	0	0	0
0	1681	1	0	1	68	20110620	0	1	0	1	0	2	0	0	0.5	0	1	0	0	1	0	0	0	0	0	0	0	0	0
0	1682	0	1	0	43	20110624	0	1	0	0	0	1	0	0	0.5	0	1	0	0	1	0	0	0	1	1	3	0	0	0
0	1683	0	1	0	34	20110624	0	1	0	0	1	0	0	0	0.5	0	1	0	0	1	1	0	1	0	0	7	0	0	0
0	1684	1	0	0	44	20110624	1	1	0	0	0	2	0	0	0.5	0	1	0	0	1	1	1	0	1	4	4	0	0	0
0	1685	1	0	0	30	20110704	1	1	0	0	0	1	0	0	0.5	0	1	0	0	0	0	1	0	1	2	7	0	0	0
0	1686	1	0	1	64	20110706	1	1	0	0	0	1	0	0	0.5	0	1	0	0	0	1	1	0	0	0	2	0	0	0
0	1687	0	1	0	24	20110706	0	1	0	1	0	2	0	0	0.5	0	1	0	0	1	1	1	0	1	2	6	0	0	0
0	1688	1	0	0	51	20110707	1	1	0	1	0	2	0	0	0.5	0	1	0	0	1	0	0	1	0	0	5	0	0	0
0	1689	1	0	0	50	20110707	1	1	0	1	0	2	0	0	0.5	0	1	0	0	1	1	0	1	0	0	4	0	0	0
0	1690	1	0	0	35	20110708	0	1	0	1	1	0	0	0	0.5	0	1	0	0	0	1	1	1	1	1	4	0	0	0
0	1691	1	0	0	35	20110712	1	1	1	1	0	1	0	0	0.5	0	1	0	0	1	1	0	0	0	0	0	0	0	2
0	1692	1	0	0	30	20110713	0	1	0	0	1	0	0	0	0.5	0	1	0	0	1	0	1	0	1	1	2	0	0	0
0	1693	1	0	0	39	20110718	0	1	0	0	0	1	0	0	0.5	0	1	0	0	1	0	0	1	0	0	2	0	0	0
0	1694	1	0	0	42	20110718	1	1	0	1	0	2	0	0	0.5	0	1	0	0	1	0	0	1	0	0	6	0	0	0
0	1695	1	0	1	59	20110719	0	1	0	0	0	1	0	1	0.5	0	1	0	0	0	1	0	0	0	0	0	0	0	0
0	1696	0	1	0	32	20110719	1	1	0	0	0	1	0	0	0.5	0	1	0	0	1	1	1	0	1	5	6	0	0	0
0	1697	1	0	0	54	20110719	0	1	0	2	0	1	0	0	0.5	0	1	0	0	1	0	0	0	0	0	2	0	0	0
0	1698	1	0	1	56	20110720	0	1	0	1	0	1	0	0	0.5	0	1	0	0	1	0	0	1	0	0	5	0	0	0
0	1699	1	0	0	28	20110720	1	1	0	0	0	2	0	0	0.5	0	1	0	0	0	0	1	0	0	0	9	0	0	0
0	1700	1	0	0	48	20110721	1	1	0	0	0	2	0	0	0.5	0	0	1	1	1	1	1	0	1	3	8	0	0	0
0	1701	1	0	1	56	20110721	1	1	0	1	0	1	0	0	0.5	0	0	1	1	1	1	0	0	0	0	7	0	0	0
0	1702	0	1	0	38	20110722	0	1	0	0	0	1	0	0	0.5	0	1	0	0	1	1	0	0	0	0	5	0	0	0
0	1703	1	0	1	56	20110725	0	1	0	1	0	1	0	0	0.5	0	1	0	0	1	1	0	0	0	0	2	0	0	0
0	1704	1	0	0	42	20110725	1	1	0	0	1	0	0	0	0.5	1	0	1	2	1	1	0	1	0	0	1	0	0	0
0	1705	1	0	0	45	20110726	1	1	0	1	1	0	0	0	0.5	1	0	1	2	1	0	0	1	1	2	10	0	0	0
0	1706	1	0	1	59	20110726	1	1	0	1	0	2	0	0	0.5	0	1	0	0	1	1	0	0	1	1	4	0	0	0
0	1707	1	0	0	43	20110726	1	1	0	0	0	1	0	0	0.5	0	1	0	0	1	1	0	0	1	1	1	0	0	0
0	1708	1	0	0	45	20110804	0	1	0	1	0	2	0	0	0.5	0	1	0	0	1	0	1	0	1	1	6	0	0	0
0	1709	1	0	0	21	20110804	0	1	0	0	0	1	0	0	0.5	0	1	0	0	1	0	0	0	0	0	0	0	0	0
0	1710	1	0	0	39	20110809	0	1	0	0	0	1	0	0	0.5	0	1	0	0	1	0	0	0	0	0	0	0	0	0
0	1711	0	1	0	46	20110809	1	1	0	0	1	0	0	0	0.5	0	1	0	0	1	1	0	0	0	0	2	0	0	0
0	1712	1	0	0	51	20110809	1	1	0	0	1	0	0	0	0.5	1	0	1	2	1	1	1	1	0	0	9	0	0	0
0	1713	1	0	1	67	20110809	1	1	0	1	1	0	0	0	0.5	1	0	1	2	1	1	0	1	0	0	5	0	0	0
0	1714	1	0	1	60	20110810	1	1	0	0	0	1	0	0	0.5	1	0	1	2	1	0	0	0	0	0	4	0	0	0
0	1715	0	1	0	53	20110811	1	1	0	0	0	2	0	0	0.5	1	1	1	2	0	0	1	0	0	0	8	0	0	0
0	1716	1	0	0	31	20110811	1	1	0	1	1	0	0	0	0.5	0	1	0	0	0	1	1	0	1	3	4	0	0	0
0	1717	0	1	1	65	20110816	1	1	0	0	0	1	0	0	0.5	0	1	0	0	1	0	0	0	0	0	0	0	0	0
0	1718	0	1	0	51	20110817	0	1	0	1	0	1	0	0	0.5	0	1	0	0	1	0	0	0	1	2	3	0	0	0
0	1719	0	1	0	48	20110822	1	1	0	1	0	1	0	0	0.5	0	1	0	0	1	1	1	1	0	0	2	0	0	0
0	1720	1	0	0	20	20110822	0	1	0	1	1	0	0	0	0.5	0	1	0	0	1	1	1	1	1	3	5	0	0	0
0	1721	1	0	1	62	20110825	1	1	0	1	0	1	0	0	0.5	0	1	0	0	1	0	0	0	1	1	4	0	0	0
0	1722	1	0	0	39	20110825	0	1	0	0	0	1	0	0	0.5	0	0	1	1	1	1	1	0	0	0	0	0	0	0
0	1723	1	0	1	60	20110826	1	1	0	0	0	1	0	0	0.5	1	0	1	2	1	1	0	0	0	0	3	0	0	5
1	1724	0	1	0	24	20110826	1	1	1	0	1	0	0	0	0.5	0	1	0	0	1	1	1	0	1	8	15	1	5	47
0	1725	1	0	0	45	20110829	0	1	0	0	0	1	0	0	0.5	0	1	0	0	1	1	0	0	0	0	1	0	0	0
0	1726	1	0	1	61	20110829	0	1	0	0	0	1	0	0	0.5	0	1	0	0	0	0	0	1	0	0	9	0	0	0
0	1727	1	0	0	30	20110830	0	1	0	0	1	0	0	0	0.5	0	1	0	0	1	0	1	1	0	0	12	0	0	0
0	1728	1	0	0	52	20110830	1	1	0	1	0	1	0	0	0.5	0	1	0	0	0	0	1	0	0	0	8	0	0	0
0	1729	1	0	0	47	20110905	0	1	0	0	0	1	0	0	0.5	0	1	0	0	0	0	0	0	0	0	1	0	0	0
0	1730	1	0	0	38	20110905	0	1	0	1	0	1	0	0	0.5	0	1	0	0	1	1	0	0	0	0	5	0	0	0
0	1731	0	1	0	48	20110907	1	1	0	1	0	1	0	0	0.5	0	1	0	0	1	0	1	0	1	5	5	0	0	0
0	1732	1	0	0	37	20110907	1	1	0	1	0	1	0	0	0.5	0	1	0	0	1	1	0	0	0	0	2	0	0	3
0	1733	1	0	1	60	20110907	0	1	0	1	0	1	0	0	0.5	0	1	0	0	1	0	0	0	0	0	3	0	0	0
0	1734	0	1	0	50	20110908	0	1	0	0	0	1	0	0	0.5	0	1	0	0	1	1	0	0	0	0	0	0	0	0
0	1735	1	0	0	47	20110908	1	1	0	1	0	1	0	0	0.5	0	1	0	0	1	1	0	0	0	0	5	0	0	0
0	1736	1	0	0	40	20110908	0	1	0	1	0	2	0	0	0.5	0	1	0	0	1	1	0	1	0	0	5	0	0	0
0	1737	1	0	0	54	20110916	0	1	0	0	0	1	0	0	0.5	0	1	0	0	0	0	0	0	0	0	1	0	0	0
1	1738	1	0	0	53	20110922	1	1	1	0	0	1	0	0	0.5	0	0	1	1	1	0	1	1	0	0	4	1	3	23
0	1739	1	0	0	52	20110922	0	1	0	0	1	0	0	0	0.5	0	0	1	1	1	0	0	0	0	0	4	0	0	0
0	1740	1	0	1	55	20110923	1	1	1	0	0	1	0	0	0.5	0	1	0	0	1	1	0	0	0	0	1	0	0	34
0	1741	1	0	1	73	20110926	0	1	0	0	0	2	0	0	0.5	0	1	0	0	0	0	0	0	0	0	3	0	0	0
0	1742	1	0	0	50	20110926	0	1	0	0	0	1	0	0	0.5	0	1	0	0	0	0	0	0	0	0	4	0	0	0
0	1743	1	0	0	39	20110930	0	1	0	0	0	1	0	0	0.5	0	1	0	0	1	0	0	1	0	0	5	0	0	0
0	1744	1	0	0	51	20111006	1	1	0	0	0	1	0	0	0.5	1	0	1	2	1	1	0	1	0	0	4	0	0	0
0	1745	1	0	0	50	20111010	0	1	0	1	1	0	0	0	0.5	0	1	0	0	1	1	0	1	0	0	2	0	0	0
0	1746	1	0	1	64	20111011	1	1	0	0	0	2	0	0	0.5	0	1	0	0	1	1	0	0	0	0	1	0	0	0
0	1747	0	1	0	54	20111013	1	1	0	1	0	1	0	0	0.5	0	1	0	0	1	0	1	1	0	0	15	0	0	0
0	1748	1	0	0	46	20111014	1	1	0	0	0	1	0	0	0.5	0	0	1	1	1	1	1	0	1	4	4	0	0	0
0	1749	1	0	0	42	20111017	0	1	0	1	1	0	0	0	0.5	0	1	0	0	1	1	1	0	0	0	1	0	0	0
0	1750	0	1	0	46	20111017	0	1	0	0	0	1	0	0	0.5	0	1	0	0	1	0	0	0	0	0	1	0	0	0
0	1751	1	0	0	28	20111025	0	1	0	0	0	1	0	0	0.5	0	1	0	0	1	0	0	0	0	0	1	0	0	0
0	1752	1	0	0	47	20111026	1	1	0	0	1	0	0	0	0.5	0	0	1	1	1	1	1	0	0	0	1	0	0	0
0	1753	1	0	0	30	20111026	1	1	0	1	0	1	0	0	0.5	0	1	0	0	0	0	1	0	1	3	5	0	0	0
0	1754	1	0	0	37	20111027	1	1	0	0	0	2	0	0	0.5	0	1	0	0	0	0	1	0	0	0	7	0	0	0
0	1755	1	0	0	36	20111028	1	1	0	1	0	2	0	0	0.5	0	1	0	0	0	0	0	0	1	1	1	0	0	0
0	1756	1	0	0	38	20111028	0	1	0	1	0	1	0	0	0.5	0	1	0	0	1	0	1	0	0	0	0	0	0	0
0	1757	1	0	0	45	20111031	0	1	0	1	0	1	0	0	0.5	0	1	0	0	1	0	0	1	0	0	3	0	0	0
0	1758	1	0	0	46	20111031	0	1	0	1	0	1	0	0	0.5	0	1	0	0	1	1	0	0	0	0	3	0	0	0
0	1759	1	0	0	38	20111031	0	1	0	0	0	1	0	0	0.5	0	1	0	0	0	0	0	0	0	0	0	0	0	0
0	1760	1	0	1	63	20111107	0	1	0	0	1	0	0	0	0.5	0	1	0	0	1	1	0	0	0	0	2	0	0	0
0	1761	0	1	0	54	20111108	0	1	0	1	0	2	0	0	0.5	0	1	0	0	1	0	0	0	0	0	5	0	0	5
0	1762	1	0	1	56	20111109	1	1	0	1	0	2	0	0	0.5	1	0	1	2	1	0	0	0	0	0	3	0	0	0
0	1763	1	0	0	25	20111109	1	1	0	1	1	0	0	0	0.5	1	0	1	2	0	0	0	0	1	3	5	0	0	0
0	1764	1	0	1	62	20111114	1	1	0	0	0	2	0	0	0.5	0	1	0	0	1	1	0	0	0	0	1	0	0	0
0	1765	1	0	0	49	20111116	1	1	0	2	1	0	0	0	0.5	1	0	1	2	1	0	1	0	0	0	7	0	0	7
0	1766	0	1	0	47	20111117	1	1	0	1	0	1	0	0	0.5	0	1	0	0	1	1	0	0	1	1	6	0	0	0
0	1767	1	0	0	45	20111118	0	1	0	1	0	2	0	0	0.5	0	0	1	1	1	0	1	1	0	0	5	0	0	0
0	1768	1	0	0	43	20111122	1	1	0	1	0	1	0	0	0.5	0	1	0	0	1	1	0	0	0	0	0	0	0	0
0	1769	1	0	0	46	20111122	0	1	0	0	0	2	0	0	0.5	0	1	0	0	1	0	0	1	0	0	6	0	0	0
0	1770	1	0	1	56	20111124	1	1	0	0	0	1	0	1	0.5	0	1	0	0	0	1	0	0	0	0	10	0	0	0
0	1771	1	0	0	28	20111124	1	1	0	0	0	2	0	0	0.5	0	1	0	0	1	1	1	0	1	6	6	0	0	0
0	1772	1	0	0	54	20111124	1	1	0	1	0	1	0	0	0.5	0	1	0	0	1	1	0	0	1	3	3	0	0	0
0	1773	1	0	0	42	20111128	0	1	0	1	0	2	0	0	0.5	0	1	0	0	1	1	0	0	0	0	2	0	0	0
0	1774	0	1	0	49	20111129	1	1	0	0	0	2	0	0	0.5	0	1	0	0	1	1	0	1	0	0	4	0	0	0
0	1775	0	1	1	56	20111129	1	1	0	0	0	2	0	0	0.5	0	1	0	0	1	1	0	0	0	0	4	0	0	0
0	1776	1	0	0	24	20111129	0	1	0	1	0	1	0	0	0.5	0	1	0	0	1	0	1	0	0	0	0	0	0	0
0	1777	1	0	0	40	20111130	0	1	0	1	1	0	0	0	0.5	0	1	0	0	1	1	0	0	0	0	0	0	0	0
0	1778	1	0	1	61	20111130	0	1	0	0	1	0	0	0	0.5	0	1	0	0	1	1	0	0	0	0	4	0	0	0
0	1779	1	0	0	37	20111201	0	1	0	0	0	1	0	0	0.5	0	1	0	0	1	0	0	0	0	0	10	0	0	0
0	1780	1	0	0	34	20111201	1	1	0	0	0	1	0	0	0.5	0	0	1	1	1	0	0	0	0	0	5	0	0	0
0	1781	1	0	0	28	20111201	0	1	0	1	0	1	0	0	0.5	0	1	0	0	1	1	1	0	0	0	4	0	0	0
0	1782	1	0	0	53	20111202	0	0	0	0	0	2	0	0	0.5	0	1	0	0	1	0	0	0	0	0	2	0	0	0
0	1783	0	1	0	32	20111205	0	1	0	1	0	1	0	0	0.5	1	1	1	2	1	0	0	0	0	0	3	0	0	0
0	1784	1	0	1	55	20111205	0	1	0	0	0	1	0	0	0.5	0	0	1	1	0	0	0	1	0	0	2	0	0	0
0	1785	0	1	0	45	20111206	1	1	0	0	1	0	0	0	0.5	0	1	0	0	1	1	0	0	0	0	1	0	0	0
0	1786	1	0	0	48	20111207	0	1	0	0	0	2	0	0	0.5	0	1	0	0	1	0	1	1	0	0	11	0	0	0
0	1787	1	0	0	48	20111208	0	1	0	0	0	2	0	0	0.5	0	1	0	0	1	1	0	0	0	0	0	0	0	0
0	1788	1	0	0	51	20111209	1	1	0	1	0	1	0	0	0.5	1	0	1	2	1	0	1	0	0	0	1	0	0	0
0	1789	1	0	1	66	20111212	1	1	0	1	0	1	0	0	0.5	1	0	1	2	1	0	0	0	1	1	4	0	0	0
0	1790	1	0	0	44	20111213	1	1	0	0	0	1	0	0	0.5	1	0	1	2	1	0	0	0	0	0	2	0	0	0
0	1791	1	0	0	38	20111213	1	1	0	2	0	1	0	0	0.5	0	1	0	0	1	1	0	0	1	1	10	0	0	0
0	1792	1	0	0	36	20111214	0	1	0	1	0	1	0	0	0.5	0	1	0	0	1	0	1	1	0	0	14	0	0	0
0	1793	0	1	1	62	20111214	0	1	0	1	1	0	0	0	0.5	0	1	0	0	1	1	0	0	0	0	2	0	0	0
0	1794	1	0	0	51	20111215	0	1	0	0	1	0	0	0	0.5	0	0	1	1	0	0	0	0	0	0	5	0	0	0
0	1795	1	0	0	44	20111216	1	1	0	0	0	2	0	0	0.5	1	0	1	2	1	0	0	1	1	1	5	0	0	0
0	1796	1	0	0	32	20111219	1	1	0	1	0	1	0	0	0.5	0	1	0	0	0	1	0	0	1	1	5	0	0	0
0	1797	1	0	0	47	20111219	0	1	0	0	0	1	0	0	0.5	0	1	0	0	1	0	0	0	0	0	5	0	0	0
0	1798	1	0	0	48	20111220	1	1	0	0	0	1	0	0	0.5	0	0	1	1	0	0	1	0	0	0	1	0	0	0
0	1799	1	0	0	43	20111220	1	1	0	1	0	2	0	0	0.5	0	1	0	0	1	1	0	0	0	0	2	0	0	0
0	1800	1	0	1	63	20111222	1	1	0	1	0	2	0	0	0.5	0	0	1	1	1	0	1	0	0	0	7	0	0	0
0	1801	0	1	0	37	20111222	1	1	0	1	0	1	0	0	0.5	1	1	1	2	1	0	1	0	1	1	1	0	0	0
0	1802	1	0	0	33	20111222	1	1	0	0	0	1	0	0	0.5	0	1	0	0	1	1	0	0	1	5	16	0	0	0
0	1803	1	0	0	42	20111223	1	1	0	0	1	0	0	0	0.5	0	1	0	0	1	0	0	1	1	2	6	0	0	0
0	1804	1	0	0	51	20111223	1	1	0	1	0	2	0	0	0.5	0	0	1	1	1	1	0	0	1	1	1	0	0	0
0	1805	0	1	1	58	20111223	0	1	0	1	0	1	0	0	0.5	0	1	0	0	1	1	0	0	0	0	6	0	0	0
0	1806	1	0	0	41	20111226	0	1	0	1	0	1	0	0	0.5	0	1	0	0	1	1	1	0	0	0	1	0	0	0
0	1807	1	0	0	49	20111226	1	1	0	2	0	1	0	0	0.5	0	1	0	0	1	1	0	0	1	2	2	0	0	0
0	1808	1	0	0	40	20111226	1	1	0	0	0	1	0	0	0.5	1	0	1	2	1	1	0	0	1	2	3	0	0	0
0	1809	1	0	1	62	20111227	1	1	0	0	0	1	0	0	0.5	0	1	0	0	1	1	0	0	0	0	5	0	0	0
0	1810	0	1	0	38	20111228	0	1	0	0	0	1	0	0	0.5	0	1	0	0	1	0	0	0	0	0	6	0	0	0
0	1811	0	1	0	48	20111228	0	1	0	0	0	1	0	0	0.5	0	1	0	0	1	0	0	0	1	1	3	0	0	0
0	1812	0	1	0	43	20111228	0	1	0	1	0	2	0	0	0.5	0	1	0	0	0	0	0	1	0	0	10	0	0	0
0	1813	1	0	0	39	20111229	1	1	0	0	1	0	0	0	0.5	0	1	0	0	1	1	0	1	0	0	13	0	0	0
0	1814	1	0	0	45	20111229	0	1	0	1	0	1	0	0	0.5	0	1	0	0	1	0	0	1	0	0	4	0	0	0
0	1815	0	1	0	45	20120725	1	1	0	1	0	1	0	1	0	0	1	0	0	1	0	0	0	0	0	1	0	0	0
0	1816	1	0	0	29	20121031	0	1	0	1	1	0	0	0	0.01	0	1	0	0	1	0	1	1	0	0	9	0	0	0
0	1817	1	0	0	48	20120308	1	1	0	1	0	2	0	0	0.05	0	1	0	0	1	0	0	0	0	0	0	0	0	0
0	1818	1	0	0	35	20120315	1	1	0	1	0	2	0	0	0.07	0	1	0	0	1	0	0	0	0	0	0	0	0	0
0	1819	1	0	1	63	20120118	1	1	0	1	0	1	0	0	0.1	0	1	0	0	1	0	0	0	0	0	2	0	0	0
0	1820	0	1	0	43	20120130	1	1	0	1	0	1	0	0	0.1	0	1	0	0	1	1	0	0	1	2	5	0	0	0
0	1821	1	0	0	38	20120227	0	1	0	1	1	0	0	0	0.1	0	1	0	0	1	0	0	1	0	0	11	0	0	0
0	1822	1	0	0	48	20120314	1	1	0	1	0	1	0	0	0.1	0	1	0	0	0	0	0	0	0	0	6	0	0	0
0	1823	1	0	0	49	20120723	1	1	0	0	0	2	0	0	0.1	0	1	0	0	1	0	0	1	0	0	17	0	0	6
0	1824	1	0	0	52	20120907	1	1	0	1	0	2	0	2	0.1	0	1	0	0	1	0	1	1	1	1	12	0	0	0
0	1825	1	0	0	51	20120918	0	1	0	1	0	2	0	0	0.1	0	1	0	0	1	0	0	0	0	0	1	0	0	0
0	1826	1	0	1	60	20121023	0	1	0	0	0	1	0	0	0.1	0	1	0	0	1	0	0	0	0	0	3	0	0	0
0	1827	1	0	0	37	20121127	1	1	0	0	0	1	0	0	0.1	0	1	0	0	1	0	0	0	0	0	3	0	0	0
0	1828	1	0	0	43	20121210	1	1	0	0	0	1	0	0	0.1	0	1	0	0	1	0	0	1	0	0	0	0	0	0
1	1829	1	0	0	41	20120702	1	1	1	1	1	0	0	1	0.15	0	1	0	0	1	0	0	1	0	0	19	1	2	32
1	1830	0	1	0	54	20120102	1	1	1	1	1	0	0	0	0.2	1	1	1	2	1	1	0	1	0	0	9	1	1	33
0	1831	1	0	0	44	20120105	0	1	0	0	0	1	0	0	0.2	0	1	0	0	0	0	0	0	0	0	1	0	0	0
0	1832	1	0	0	31	20120110	0	1	0	0	1	0	0	0	0.2	0	1	0	0	1	0	0	0	0	0	0	0	0	0
0	1833	1	0	0	47	20120112	0	1	0	1	1	0	0	1	0.2	0	1	0	0	1	0	0	1	0	0	1	0	0	0
0	1834	1	0	0	38	20120112	0	1	0	0	0	1	0	0	0.2	0	1	0	0	1	0	0	0	0	0	1	0	0	0
0	1835	1	0	0	48	20120117	0	0	0	1	0	1	0	0	0.2	0	1	0	0	1	0	0	0	0	0	0	0	0	0
0	1836	1	0	1	63	20120202	1	1	0	1	1	0	0	0	0.2	0	1	0	0	1	0	0	1	0	0	12	0	0	0
0	1837	1	0	1	69	20120302	1	1	0	0	0	1	0	0	0.2	0	1	0	0	1	0	0	0	0	0	14	0	0	0
0	1838	1	0	0	37	20120313	1	1	0	1	0	2	0	0	0.2	0	1	0	0	1	0	0	0	0	0	10	0	0	0
0	1839	1	0	0	40	20120315	1	1	0	0	1	0	0	0	0.2	0	1	0	0	1	0	0	0	0	0	7	0	0	0
0	1840	1	0	1	64	20120316	0	1	0	0	0	2	0	0	0.2	0	1	0	0	1	0	0	0	0	0	2	0	0	0
0	1841	1	0	0	30	20120319	0	1	0	0	0	1	0	0	0.2	0	1	0	0	0	0	0	1	0	0	1	0	0	0
0	1842	1	0	0	44	20120322	1	1	0	1	1	0	0	0	0.2	0	1	0	0	1	1	0	0	0	0	11	0	0	0
0	1843	1	0	1	68	20120413	0	1	0	1	1	0	0	0	0.2	0	1	0	0	1	1	0	0	0	0	4	0	0	0
0	1844	1	0	1	55	20120413	0	1	0	1	0	1	0	0	0.2	0	1	0	0	1	0	0	0	0	0	1	0	0	0
0	1845	1	0	1	58	20120424	1	1	0	0	0	1	0	0	0.2	0	1	0	0	1	0	0	1	0	0	9	0	0	0
0	1846	1	0	0	30	20120427	0	1	0	0	0	1	0	0	0.2	0	1	0	0	1	0	1	1	0	0	12	0	0	8
0	1847	1	0	0	31	20120427	0	1	0	0	0	1	0	0	0.2	0	1	0	0	0	1	1	1	1	1	9	0	0	0
0	1848	1	0	0	38	20120504	1	1	0	1	0	1	0	0	0.2	0	1	0	0	1	0	0	0	0	0	4	0	0	0
0	1849	1	0	1	56	20120515	1	1	0	0	1	0	0	0	0.2	0	1	0	0	1	1	0	0	1	2	8	0	0	0
0	1850	1	0	0	36	20120524	0	1	0	0	1	0	0	0	0.2	0	1	0	0	1	0	0	0	0	0	6	0	0	0
0	1851	1	0	1	62	20120608	1	1	0	1	0	1	0	0	0.2	0	1	0	0	1	0	0	0	0	0	3	0	0	0
0	1852	1	0	0	41	20120618	1	1	0	1	0	2	0	0	0.2	1	0	1	2	1	0	0	1	0	0	7	0	0	0
0	1853	1	0	0	40	20120618	1	1	0	1	0	1	0	0	0.2	1	0	1	2	0	0	0	0	0	0	1	0	0	0
0	1854	1	0	0	46	20120627	0	1	0	0	0	1	0	0	0.2	0	0	1	1	1	0	1	0	0	0	5	0	0	0
0	1855	0	1	1	65	20120718	0	1	0	0	1	0	0	0	0.2	0	1	0	0	0	0	0	1	0	0	1	0	0	0
0	1856	1	0	0	54	20120726	0	1	0	1	1	0	0	0	0.2	0	1	0	0	1	0	0	0	0	0	8	0	0	0
0	1857	1	0	1	63	20120809	0	1	0	0	0	2	0	0	0.2	0	1	0	0	1	0	0	1	0	0	0	0	0	0
0	1858	0	1	0	43	20120904	0	1	0	0	1	0	0	0	0.2	0	1	0	0	1	0	0	1	0	0	7	0	0	0
0	1859	0	1	0	34	20120907	0	1	0	0	0	1	0	0	0.2	0	1	1	1	1	0	1	0	1	2	4	0	0	0
0	1860	1	0	0	53	20120926	0	1	0	0	1	0	0	0	0.2	0	1	0	0	1	1	0	0	0	0	0	0	0	0
0	1861	1	0	0	44	20121017	0	1	0	1	1	0	0	0	0.2	0	1	0	0	0	0	0	0	0	0	8	0	0	0
0	1862	1	0	0	39	20121018	0	1	0	1	0	1	0	0	0.2	0	1	0	0	1	0	0	1	0	0	2	0	0	0
0	1863	0	1	0	34	20121108	0	1	0	0	0	1	0	0	0.2	0	1	0	0	1	0	0	0	1	1	6	0	0	0
0	1864	1	0	0	36	20121114	0	1	0	0	0	1	0	0	0.2	0	1	0	0	1	0	0	1	0	0	0	0	0	0
0	1865	1	0	0	39	20121203	0	1	0	0	1	0	0	0	0.2	0	1	0	0	1	0	0	1	0	0	5	0	0	0
0	1866	1	0	1	64	20121204	0	1	0	1	0	1	0	0	0.2	0	1	0	0	0	0	0	0	0	0	0	0	0	0
0	1867	1	0	0	50	20121207	0	1	0	0	1	0	0	0	0.2	0	1	0	0	0	0	0	0	0	0	4	0	0	0
0	1868	1	0	0	47	20121211	1	1	0	1	0	1	0	0	0.2	0	0	1	1	1	0	0	1	1	5	16	0	0	0
0	1869	0	1	0	42	20121218	0	1	0	0	0	2	0	0	0.2	0	1	0	0	1	0	0	1	0	0	3	0	0	0
0	1870	1	0	0	46	20121227	0	1	0	0	0	1	0	0	0.2	0	1	0	0	1	0	0	1	0	0	0	0	0	0
0	1871	0	1	0	33	20121228	1	1	0	1	0	1	0	0	0.2	0	1	0	0	1	0	0	0	1	6	13	0	0	0
0	1872	1	0	0	49	20120807	0	1	0	1	1	0	0	0	0.25	0	1	0	0	1	1	0	0	0	0	1	0	0	0
0	1873	1	0	0	51	20120102	0	1	0	0	1	0	0	0	0.3	0	1	0	0	1	0	0	0	0	0	4	0	0	0
0	1874	1	0	1	62	20120102	1	1	0	1	0	2	0	0	0.3	0	1	0	0	1	0	1	0	0	0	1	0	0	0
0	1875	1	0	0	41	20120103	0	1	0	0	0	1	0	0	0.3	0	1	0	0	1	0	0	0	0	0	2	0	0	0
0	1876	1	0	0	41	20120105	0	1	0	1	0	1	0	0	0.3	0	1	0	0	0	0	0	0	0	0	2	0	0	0
0	1877	1	0	0	52	20120105	0	1	0	1	0	1	0	0	0.3	0	1	0	0	1	0	0	0	0	0	1	0	0	0
0	1878	1	0	0	34	20120106	0	1	0	0	1	0	0	0	0.3	0	1	0	0	1	1	0	1	0	0	3	0	0	0
0	1879	1	0	0	40	20120106	1	1	0	0	0	1	0	0	0.3	1	0	1	2	1	1	0	0	0	0	8	0	0	7
0	1880	1	0	0	49	20120111	1	1	0	0	0	1	0	0	0.3	0	1	0	0	1	0	0	0	0	0	1	0	0	0
0	1881	1	0	0	28	20120112	0	1	0	1	0	1	0	0	0.3	0	1	0	0	1	1	0	0	0	0	2	0	0	0
0	1882	1	0	0	41	20120113	0	1	0	0	0	1	0	0	0.3	0	1	0	0	1	1	0	1	0	0	4	0	0	0
0	1883	1	0	0	48	20120113	1	0	0	0	0	1	0	0	0.3	0	1	0	0	0	0	0	1	0	0	0	0	0	0
0	1884	1	0	0	51	20120117	0	1	0	0	0	1	0	0	0.3	0	1	0	0	0	0	1	0	0	0	2	0	0	0
0	1885	1	0	0	52	20120119	0	1	0	0	0	2	0	0	0.3	0	1	0	0	1	0	1	0	1	2	3	0	0	0
0	1886	1	0	0	42	20120130	0	1	0	0	0	1	0	0	0.3	0	1	0	0	1	0	0	0	0	0	7	0	0	0
0	1887	1	0	0	31	20120131	0	1	0	0	0	1	0	0	0.3	0	1	0	0	1	0	1	0	0	0	4	0	0	0
0	1888	1	0	0	41	20120131	0	1	0	1	0	1	0	0	0.3	0	1	0	0	0	0	0	0	0	0	9	0	0	0
0	1889	0	1	0	51	20120131	0	1	0	0	1	0	0	0	0.3	0	1	0	0	1	1	1	0	0	0	2	0	0	0
0	1890	0	1	0	37	20120202	0	1	0	2	0	2	0	0	0.3	0	1	0	0	0	0	0	0	1	1	1	0	0	0
0	1891	1	0	0	54	20120202	1	1	0	0	0	1	0	0	0.3	0	1	0	0	0	0	0	1	0	0	6	0	0	7
0	1892	1	0	0	34	20120202	1	1	0	1	1	0	0	0	0.3	0	0	1	1	0	1	0	0	1	4	6	0	0	0
0	1893	1	0	1	58	20120203	0	1	0	1	0	1	0	0	0.3	0	1	0	0	0	0	0	0	0	0	2	0	0	0
0	1894	1	0	0	34	20120203	0	1	0	1	0	2	0	0	0.3	0	1	0	0	1	0	0	0	0	0	3	0	0	0
0	1895	1	0	1	58	20120203	1	1	0	1	1	0	0	0	0.3	1	0	1	2	1	0	0	0	0	0	8	0	0	0
0	1896	1	0	0	40	20120206	0	1	0	1	0	1	0	0	0.3	0	1	0	0	1	0	0	0	0	0	0	0	0	0
0	1897	1	0	1	60	20120206	0	1	0	0	0	1	0	0	0.3	0	1	0	0	0	0	0	0	0	0	9	0	0	0
0	1898	1	0	0	32	20120208	1	1	0	1	0	1	0	0	0.3	0	1	0	0	1	0	0	1	0	0	3	0	0	0
0	1899	0	1	0	37	20120209	0	1	0	1	0	1	0	0	0.3	0	1	0	0	1	0	0	0	0	0	0	0	0	0
0	1900	1	0	0	49	20120210	1	1	0	0	0	2	0	0	0.3	0	1	0	0	1	0	1	0	0	0	1	0	0	0
0	1901	1	0	0	49	20120210	1	1	0	0	0	1	0	0	0.3	0	1	0	0	1	0	0	0	0	0	8	0	0	0
0	1902	1	0	0	52	20120213	0	1	0	0	0	1	0	0	0.3	0	1	0	0	0	0	0	0	0	0	12	0	0	0
0	1903	0	1	0	46	20120216	0	1	0	0	1	0	0	0	0.3	0	1	0	0	0	0	0	0	0	0	1	0	0	0
0	1904	1	0	1	58	20120217	1	1	1	0	0	1	0	0	0.3	0	0	1	1	1	0	1	1	0	0	14	0	0	43
0	1905	1	0	0	42	20120220	0	1	0	0	0	2	0	0	0.3	0	1	0	0	1	0	0	1	0	0	10	0	0	0
0	1906	1	0	0	43	20120227	0	1	0	0	0	2	0	0	0.3	0	1	0	0	0	0	0	1	0	0	17	0	0	0
0	1907	1	0	0	50	20120227	1	1	0	0	0	1	0	0	0.3	0	1	0	0	1	0	1	0	0	0	4	0	0	0
0	1908	1	0	0	33	20120229	0	1	0	2	0	1	0	0	0.3	0	1	0	0	1	0	0	0	0	0	13	0	0	0
0	1909	1	0	0	53	20120302	0	1	0	2	0	1	0	0	0.3	0	1	0	0	1	1	0	1	1	2	5	0	0	0
0	1910	1	0	0	35	20120306	0	0	0	1	0	2	0	0	0.3	0	1	0	0	1	0	0	0	0	0	0	0	0	0
0	1911	1	0	0	46	20120306	0	0	0	1	0	1	0	0	0.3	0	1	0	0	1	0	1	0	0	0	0	0	0	0
0	1912	1	0	0	45	20120308	0	0	0	0	0	2	0	0	0.3	0	1	0	0	1	0	0	1	0	0	0	0	0	0
0	1913	1	0	0	32	20120308	0	1	0	1	0	2	0	0	0.3	0	1	0	0	0	0	0	1	0	0	2	0	0	0
0	1914	1	0	1	58	20120319	1	1	0	2	0	1	0	0	0.3	0	1	0	0	1	0	0	0	0	0	6	0	0	0
0	1915	1	0	0	43	20120320	1	1	0	0	0	1	0	0	0.3	0	1	0	0	1	1	1	0	0	0	1	0	0	0
0	1916	0	1	0	40	20120322	0	1	0	0	0	2	0	0	0.3	0	1	0	0	1	1	1	1	0	0	16	0	0	0
0	1917	1	0	0	34	20120323	1	1	0	2	0	1	0	0	0.3	0	1	0	0	1	0	0	1	0	0	5	0	0	0
0	1918	0	1	0	45	20120329	0	1	0	0	1	0	0	0	0.3	0	1	0	0	1	1	0	1	1	3	9	0	0	0
0	1919	1	0	1	63	20120402	0	1	0	0	0	1	0	0	0.3	0	1	0	0	1	1	0	0	0	0	1	0	0	0
0	1920	1	0	0	44	20120403	0	1	0	0	0	2	0	0	0.3	0	0	1	1	0	0	0	0	0	0	0	0	0	0
0	1921	1	0	0	40	20120403	0	1	0	0	1	0	0	0	0.3	0	1	0	0	1	0	0	0	0	0	0	0	0	0
0	1922	1	0	0	34	20120404	0	1	0	1	0	1	0	0	0.3	0	1	0	0	1	0	0	0	0	0	4	0	0	0
0	1923	1	0	0	37	20120405	0	1	0	1	0	2	0	0	0.3	0	1	0	0	1	1	0	0	0	0	4	0	0	0
0	1924	1	0	0	52	20120405	1	1	0	0	0	1	0	0	0.3	0	1	0	0	0	0	0	0	0	0	6	0	0	0
0	1925	1	0	0	44	20120406	0	1	0	1	0	1	0	0	0.3	0	1	0	0	1	1	0	0	0	0	1	0	0	0
0	1926	1	0	0	48	20120409	0	1	0	0	0	2	0	0	0.3	0	1	0	0	1	0	0	0	0	0	5	0	0	0
0	1927	1	0	0	34	20120413	0	1	0	1	0	1	0	0	0.3	0	1	0	0	1	1	0	0	0	0	3	0	0	0
0	1928	0	1	1	60	20120417	0	1	0	1	0	1	0	1	0.3	0	1	0	0	0	0	1	0	0	0	2	0	0	0
0	1929	1	0	0	54	20120424	0	1	0	0	0	1	0	0	0.3	0	1	0	0	1	0	0	0	0	0	4	0	0	0
0	1930	0	1	0	32	20120424	0	1	0	0	0	1	0	0	0.3	0	1	0	0	1	1	0	0	0	0	1	0	0	0
0	1931	1	0	0	42	20120426	0	1	0	0	0	1	0	0	0.3	0	1	0	0	1	1	0	0	0	0	3	0	0	0
0	1932	1	0	0	50	20120427	0	1	0	0	0	1	0	0	0.3	0	1	0	0	1	0	0	0	0	0	0	0	0	0
0	1933	1	0	0	35	20120430	0	1	0	1	0	1	0	0	0.3	0	1	0	0	1	0	0	0	1	1	2	0	0	0
0	1934	0	1	0	54	20120502	1	1	0	0	0	2	0	0	0.3	0	1	0	0	1	0	0	0	0	0	2	0	0	0
1	1935	1	0	0	49	20120503	1	1	1	1	0	1	0	0	0.3	0	1	0	0	1	0	0	0	1	1	5	1	5	19
0	1936	1	0	0	51	20120504	0	1	0	0	1	0	0	0	0.3	0	1	0	0	1	1	0	0	0	0	5	0	0	0
0	1937	1	0	0	47	20120504	1	1	0	1	0	1	0	0	0.3	0	1	0	0	1	1	0	0	1	1	6	0	0	0
0	1938	1	0	0	53	20120509	1	1	0	1	0	1	0	0	0.3	0	1	0	0	1	0	0	0	0	0	5	0	0	0
0	1939	1	0	0	41	20120510	1	1	0	1	0	1	0	0	0.3	1	0	1	2	0	0	0	0	0	0	2	0	0	0
0	1940	1	0	0	35	20120511	0	1	0	1	0	1	0	0	0.3	0	1	0	0	1	1	0	0	0	0	6	0	0	0
0	1941	1	0	0	27	20120514	0	1	0	1	0	1	0	0	0.3	0	1	0	0	1	1	1	0	1	1	4	0	0	0
0	1942	1	0	1	56	20120514	1	1	0	1	0	1	0	0	0.3	0	0	1	1	1	0	0	0	0	0	3	0	0	0
0	1943	1	0	1	59	20120515	0	1	0	0	0	1	0	0	0.3	0	0	1	1	1	0	1	0	0	0	1	0	0	0
0	1944	1	0	0	41	20120523	0	1	0	0	0	2	0	0	0.3	0	1	0	0	0	0	0	0	0	0	8 pyramidal 포함 (0/1):	0	0	0
0	1945	1	0	1	57	20120524	1	1	0	0	0	1	0	0	0.3	0	1	0	0	1	0	0	0	0	0	6	0	0	0
0	1946	1	0	0	41	20120525	0	1	0	0	0	2	0	0	0.3	0	1	0	0	1	0	0	0	0	0	1	0	0	0
0	1947	1	0	0	29	20120529	0	1	0	0	1	0	0	0	0.3	0	1	0	0	1	0	0	1	0	0	13	0	0	0
0	1948	1	0	1	62	20120530	1	1	0	0	1	0	0	0	0.3	0	1	0	0	1	0	0	1	0	0	5	0	0	0
0	1949	1	0	1	62	20120530	1	1	0	1	1	0	0	0	0.3	0	1	0	0	1	1	0	1	0	0	24	0	0	0
0	1950	1	0	0	44	20120601	0	1	0	1	0	1	0	1	0.3	0	1	0	0	0	0	0	0	0	0	0	0	0	0
0	1951	1	0	0	40	20120605	1	1	0	1	0	1	0	0	0.3	0	1	0	0	1	0	1	0	0	0	3	0	0	0
0	1952	1	0	0	52	20120607	1	1	0	0	0	2	0	0	0.3	0	1	0	0	0	0	0	1	0	0	7	0	0	0
0	1953	1	0	0	40	20120611	0	1	0	0	0	2	0	0	0.3	0	1	0	0	1	0	0	1	0	0	4	0	0	0
0	1954	1	0	0	36	20120614	1	1	0	1	0	1	0	0	0.3	0	1	0	0	1	1	0	0	0	0	5	0	0	0
0	1955	1	0	1	64	20120615	0	1	0	1	1	0	0	0	0.3	0	0	1	1	0	0	0	0	0	0	2	0	0	0
0	1956	1	0	0	42	20120615	0	1	0	0	0	2	0	0	0.3	0	1	0	0	1	0	0	0	0	0	3	0	0	0
0	1957	0	1	0	51	20120618	0	1	0	1	0	2	0	0	0.3	0	1	0	0	1	0	0	0	0	0	4	0	0	0
0	1958	0	1	0	41	20120625	0	1	0	1	0	1	0	0	0.3	0	1	0	0	1	1	0	0	0	0	1	0	0	0
0	1959	0	1	0	54	20120625	1	1	0	1	0	1	0	0	0.3	0	1	0	0	1	1	0	1	1	4	6	0	0	0
0	1960	1	0	0	41	20120627	1	1	1	0	0	1	0	0	0.3	0	1	0	0	1	0	0	1	0	0	3	0	0	16
0	1961	1	0	0	45	20120702	0	1	0	1	0	1	0	0	0.3	0	1	0	0	1	0	0	0	0	0	6	0	0	0
0	1962	1	0	1	56	20120702	1	1	0	0	0	1	0	0	0.3	1	0	1	2	1	0	0	0	0	0	3	0	0	0
0	1963	1	0	0	45	20120706	0	1	0	1	0	2	0	0	0.3	0	1	0	0	0	0	1	0	0	0	1	0	0	0
0	1964	1	0	0	39	20120706	0	1	0	1	0	1	0	0	0.3	0	1	0	0	0	0	1	0	0	0	4	0	0	0
0	1965	1	0	1	56	20120709	1	1	0	0	0	2	0	0	0.3	1	0	1	2	1	0	0	0	0	0	3	0	0	0
0	1966	1	0	0	45	20120711	0	1	0	1	0	1	0	0	0.3	0	1	0	0	0	0	1	0	0	0	1	0	0	0
0	1967	1	0	1	66	20120711	0	1	0	0	1	0	0	0	0.3	0	1	0	0	0	0	0	1	0	0	1	0	0	0
0	1968	1	0	0	47	20120720	0	1	0	1	1	0	0	0	0.3	0	1	0	0	1	0	0	1	1	1	9	0	0	0
0	1969	1	0	0	54	20120725	0	1	0	0	0	2	0	0	0.3	0	0	1	1	1	1	0	0	0	0	2	0	0	0
0	1970	1	0	1	65	20120731	1	1	0	1	1	0	0	0	0.3	1	0	1	2	1	0	0	1	0	0	3	0	0	0
0	1971	1	0	1	69	20120803	1	1	0	1	0	1	0	0	0.3	0	0	1	1	1	0	0	1	0	0	7	0	0	0
0	1972	1	0	0	37	20120807	0	1	0	1	0	2	0	0	0.3	0	0	1	1	1	0	0	1	0	0	6	0	0	0
0	1973	1	0	0	44	20120810	0	1	0	0	0	1	0	0	0.3	0	1	0	0	1	0	0	1	0	0	7	0	0	0
0	1974	1	0	0	54	20120810	0	1	0	1	0	1	0	0	0.3	0	1	0	0	1	0	0	0	0	0	1	0	0	0
0	1975	1	0	0	49	20120813	0	1	0	1	0	1	0	0	0.3	0	1	0	0	1	1	0	0	0	0	3	0	0	0
0	1976	1	0	1	59	20120821	1	1	0	1	1	0	0	0	0.3	0	0	1	1	1	0	0	0	0	0	10	0	0	0
0	1977	1	0	0	36	20120821	0	1	0	0	0	1	0	0	0.3	0	1	0	0	1	0	1	1	0	0	15	0	0	0
0	1978	1	0	0	41	20120828	1	1	0	0	0	2	0	0	0.3	1	0	1	2	1	1	1	0	1	4	10	0	0	0
0	1979	1	0	0	40	20120830	0	1	0	0	0	1	0	0	0.3	0	0	1	1	1	0	0	1	0	0	9	0	0	0
0	1980	1	0	1	64	20120904	1	1	0	1	1	0	0	0	0.3	1	0	1	2	1	0	0	0	0	0	7	0	0	0
0	1981	1	0	0	52	20120905	0	1	0	0	0	1	0	0	0.3	0	0	1	1	1	0	0	1	0	0	7	0	0	0
0	1982	1	0	1	76	20120907	0	1	0	0	0	2	0	0	0.3	0	1	0	0	1	0	0	0	0	0	5	0	0	0
0	1983	1	0	0	48	20120911	0	1	0	0	0	2	0	0	0.3	0	1	0	0	1	1	0	0	1	3	8	0	0	0
0	1984	1	0	0	38	20120913	0	1	0	0	0	2	0	0	0.3	0	1	0	0	1	0	1	0	0	0	3	0	0	0
0	1985	1	0	0	37	20120914	0	1	0	0	1	0	0	0	0.3	0	1	0	0	1	0	0	0	0	0	8	0	0	0
0	1986	1	0	0	35	20120914	1	1	0	0	0	2	0	0	0.3	0	1	0	0	1	0	0	1	1	3	7	0	0	0
0	1987	1	0	0	45	20120917	0	1	0	1	1	0	0	0	0.3	0	0	1	1	1	0	1	0	0	0	7	0	0	0
0	1988	1	0	1	57	20120917	1	1	0	0	0	2	0	0	0.3	1	0	1	2	1	0	0	1	0	0	2	0	0	0
0	1989	1	0	0	46	20120917	0	1	0	1	0	1	0	0	0.3	0	0	1	1	1	0	0	0	0	0	3	0	0	0
1	1990	0	1	0	35	20120917	1	1	1	0	0	1	0	0	0.3	0	1	1	1	1	0	1	0	1	3	6	1	2	37
0	1991	1	0	1	57	20120921	1	1	0	1	1	0	0	0	0.3	0	1	0	0	1	1	1	0	0	0	11	0	0	4
0	1992	1	0	0	35	20120925	0	1	0	1	0	1	0	0	0.3	0	1	0	0	1	0	0	0	0	0	3	0	0	0
0	1993	0	1	1	62	20120925	0	1	0	1	0	2	0	1	0.3	0	1	0	0	1	0	0	0	0	0	4	0	0	0
0	1994	1	0	1	55	20120926	0	1	0	1	0	1	0	0	0.3	0	1	0	0	1	0	0	0	0	0	3	0	0	0
0	1995	1	0	0	39	20121004	1	1	0	0	0	2	0	0	0.3	0	1	0	0	1	0	0	0	0	0	6	0	0	0
0	1996	1	0	0	35	20121011	1	1	0	0	0	2	0	0	0.3	1	0	1	2	0	0	0	1	0	0	9	0	0	0
0	1997	1	0	1	59	20121012	0	1	0	1	0	2	0	0	0.3	0	1	0	0	0	0	0	0	1	1	1	0	0	0
0	1998	1	0	0	23	20121015	0	1	0	1	0	2	0	0	0.3	0	0	1	1	1	1	0	1	0	0	5	0	0	0
0	1999	1	0	0	51	20121016	1	1	0	1	1	0	0	0	0.3	0	1	0	0	1	0	0	0	1	1	4	0	0	0
[truncated: 1,005 more rows]
